# Supplementary material for: Cost-effectiveness of a quality improvement programme to reduce central line-associated bloodstream infections in intensive care units in the USA
Source: PubMed Central journal article supplement — BMJ Open. 2014 Sep 25;4(9):e006065. doi: 10.1136/bmjopen-2014-006065 (PMC4179409; doi:10.1136/bmjopen-2014-006065), 2014-09-25
Supplement: bmjopen-2014-006065.draft_revisions.pdf [file bmjopen-2014-006065.draft_revisions.pdf]

# BMJ Open

## Cost effectiveness of a quality improvement programme to reduce central line-associated bloodstream infections in intensive care units in the United States

|                                 |                                                                                                                                                                                                                                                                                                                                                                                                                                                                                                                                                       |
|---------------------------------|-------------------------------------------------------------------------------------------------------------------------------------------------------------------------------------------------------------------------------------------------------------------------------------------------------------------------------------------------------------------------------------------------------------------------------------------------------------------------------------------------------------------------------------------------------|
| Journal:                        | <i>BMJ Open</i>                                                                                                                                                                                                                                                                                                                                                                                                                                                                                                                                       |
| Manuscript ID:                  | bmjopen-2014-006065                                                                                                                                                                                                                                                                                                                                                                                                                                                                                                                                   |
| Article Type:                   | Research                                                                                                                                                                                                                                                                                                                                                                                                                                                                                                                                              |
| Date Submitted by the Author:   | 09-Jul-2014                                                                                                                                                                                                                                                                                                                                                                                                                                                                                                                                           |
| Complete List of Authors:       | Herzer, Kurt; Johns Hopkins School of Medicine, Medical Scientist Training Program<br>Niessen, Louis; University of Warwick, Liverpool School of Tropical Medicine, Centre for Applied Health Research and Delivery (CAHRD)<br>Constenla, Dagna; Johns Hopkins Bloomberg School of Public Health, International Vaccine Access Center<br>Ward, William; Johns Hopkins Bloomberg School of Public Health, Health Policy and Management<br>Pronovost, Peter; The Johns Hopkins University School of Medicine, Anesthesiology and Critical Care Medicine |
| <b>Primary Subject Heading</b>: | Intensive care                                                                                                                                                                                                                                                                                                                                                                                                                                                                                                                                        |
| Secondary Subject Heading:      | Health services research, Health policy, Infectious diseases                                                                                                                                                                                                                                                                                                                                                                                                                                                                                          |
| Keywords:                       | Health economics < HEALTH SERVICES ADMINISTRATION & MANAGEMENT, Health policy < HEALTH SERVICES ADMINISTRATION & MANAGEMENT, Health & safety < HEALTH SERVICES ADMINISTRATION & MANAGEMENT, Quality in health care < HEALTH SERVICES ADMINISTRATION & MANAGEMENT, Infection control < INFECTIOUS DISEASES, Adult intensive & critical care < INTENSIVE & CRITICAL CARE                                                                                                                                                                                |
|                                 |                                                                                                                                                                                                                                                                                                                                                                                                                                                                                                                                                       |

SCHOLARONE™  
Manuscripts

1  
2  
3 **Cost effectiveness of a quality improvement programme to reduce central line-associated**  
4 **bloodstream infections in intensive care units in the United States**  
5  
6  
7  
8

9  
0 Kurt R Herzer, Louis Niessen, Dagna O Constenla, William J Ward Jr, Peter J Pronovost  
1

2  
3  
4  
5 Medical Scientist Training Program, Johns Hopkins School of Medicine, 1830 East Monument  
6  
7 Street, Baltimore, MD 21205, USA  
8

9  
10 Kurt R Herzer  
11

12  
13 *MD-PhD student*  
14  
15  
16

17  
18 Centre for Applied Health Research and Delivery (CAHRD), Liverpool School of Tropical  
19  
20 Medicine, University of Warwick, Coventry, CV4 7AL, United Kingdom  
21  
22

23  
24  
25  
26  
27  
28  
29  
30  
31  
32  
33  
34  
35  
36  
37  
38  
39  
40  
41  
42  
43  
44  
45  
46  
47  
48  
49  
50  
51  
52  
53  
54  
55  
56  
57  
58  
59  
60  
61  
62  
63  
64  
65  
66  
67  
68  
69  
70  
71  
72  
73  
74  
75  
76  
77  
78  
79  
80  
81  
82  
83  
84  
85  
86  
87  
88  
89  
90  
91  
92  
93  
94  
95  
96  
97  
98  
99  
100

39  
40  
41  
42  
43  
44  
45  
46  
47  
48  
49  
50  
51  
52  
53  
54  
55  
56  
57  
58  
59  
60

Louis Niessen

61  
62  
63  
64  
65  
66  
67  
68  
69  
70  
71  
72  
73  
74  
75  
76  
77  
78  
79  
80  
81  
82  
83  
84  
85  
86  
87  
88  
89  
90  
91  
92  
93  
94  
95  
96  
97  
98  
99  
100

*Professor*

International Vaccine Access Center, Johns Hopkins Bloomberg School of Public Health, 855  
North Wolfe Street, Baltimore, MD 21205, USA

Dagna O Constenla

*Associate Scientist*

Department of Health Policy and Management, Johns Hopkins Bloomberg School of Public  
Health, 624 North Broadway Street, Baltimore, MD 21205, USA

William J Ward Jr

1  
2  
3 *Associate Professor*  
4  
5  
6  
7

8 Armstrong Institute for Patient Safety and Quality, Johns Hopkins Medicine, 750 East Pratt  
9 Street, Baltimore, MD 21202, USA  
0  
1

2 Peter J Pronovost  
3

4 *Professor*  
5  
6  
7

8  
9  
10  
11  
12  
13  
14  
15  
16  
17  
18  
19  
20 Correspondence to: Kurt Herzer, 1830 East Monument Street, Baltimore, MD 21205, USA;  
21  
22 [kherzer@jhmi.edu](mailto:kherzer@jhmi.edu); 443-900-2415  
23  
24

25  
26  
27 Keywords: quality improvement, cost effectiveness, nosocomial infections, health policy,  
28  
29 checklists  
0

1  
2  
3  
4  
5  
6  
7  
8  
9  
10  
11  
12  
13  
14  
15  
16  
17  
18  
19  
20  
21  
22  
23  
24  
25  
26  
27  
28  
29  
30  
31  
32  
33  
34  
35  
36  
37  
38  
39  
40  
41  
42  
43  
44  
45  
46  
47  
48  
49  
50  
51  
52  
53  
54  
55  
56  
57  
58  
59  
60  
Word Count: 3,349

## Abstract

**Objective:** To assess the cost effectiveness of a multifaceted quality improvement programme focused on reducing central line-associated bloodstream infections in intensive care units.

**Design:** Cost effectiveness analysis using a decision tree model to compare programme to non-programme intensive care units.

**Setting:** United States (US).

**Population:** Adult patients in the intensive care unit.

**Costs:** Economic costs of the programme and of central line-associated bloodstream infections were estimated from the perspective of the hospital and presented in 2013 US dollars.

**Main outcome measures:** Central line-associated bloodstream infections prevented, deaths averted due to central line-associated bloodstream infections prevented, and incremental cost effectiveness ratios. Probabilistic sensitivity analysis was performed.

**Results:** Compared to current practice, the programme is strongly dominant and reduces bloodstream infections and deaths at no additional cost. The probabilistic sensitivity analysis showed that there was an almost 80% probability that the programme reduces bloodstream infections and the infections' economic costs to hospitals. The opportunity cost of a bloodstream infection to a hospital was the most important model parameter in these analyses.

**Conclusions:** This multifaceted quality improvement programme, as it is currently implemented by hospitals on an increasingly large scale in the US, likely reduces the economic costs of central line-associated bloodstream infections for US hospitals. Awareness among hospitals about the programme's benefits should enhance implementation. The programme's implementation has the potential to substantially reduce morbidity, mortality, and economic costs associated with central line-associated bloodstream infections.

## Article summary

### Strengths and limitations of this study

- This study was conducted according to best practices in cost effectiveness analysis and demonstrates that a multifaceted quality improvement programme can reduce the economic costs of central line-associated bloodstream infections for hospitals.
- We used nationally representative data sources to increase generalisability and performed a probabilistic sensitivity analysis to quantify the uncertainty in our cost effectiveness estimates.
- Due to data limitations we were unable to assess the impact of patient heterogeneity, such as demographics and clinical characteristics, on baseline risk, treatment effect, or resource utilisation. We did not evaluate costs outside the acute hospital setting, such as rehabilitation costs or productivity losses for delays returning to work.

## INTRODUCTION

Central line-associated bloodstream infections are common, expensive to payers and patients, and potentially fatal.[1 2] Each year, nearly 80,000 Americans develop central line-associated bloodstream infections in the intensive care unit, and more than 25,000 of these patients die.[3] A single infection can cost payers as much as \$56,000, culminating in over \$2 billion in related costs per year in the United States.[4] Central line-associated bloodstream infections in intensive care unit patients have an estimated attributable mortality rate of 14 to 40%, with a prolonged length of stay of 7.5 to 25 days.[5 6]

The Keystone ICU (intensive care unit) project, first launched in Michigan in 2004 and since scaled across the United States, Spain, Peru, Pakistan, and the United Kingdom, has captured the interest and attention of patients, payers, and policymakers for its substantial, sustained, and scalable reductions in preventable nosocomial infections. Over 1,200 US hospitals are currently participating in this multifaceted quality improvement programme through *On the CUSP: Stop BSI*, a national collaborative. The programme has been evaluated through prospective cohort studies,[7-10] retrospective observational studies using claims data,[11] and both cluster nonrandomised[12] and randomised controlled trials.[13] When viewed collectively, this evidence suggests that the programme is associated with substantial reductions in both central line-associated bloodstream infections and mortality in intensive care unit patients.

In spite of commendable investment in this programme to manage the undesirable consequences of central line-associated bloodstream infections, an important question remains unanswered: compared with current practice, is this programme cost effective for US hospitals? Reporting of economic data in quality improvement studies is uncommon, and there are few formal economic evaluations of quality improvement programmes.[14-16] Similarly, because the



1  
2  
3 The target population consisted of adult (18 years or older) intensive care unit patients in  
4 accordance with studies of the Keystone ICU project and its subsequent replications.[13]  
5  
6 Because costs and benefits only accrue while the programme is implemented, the time frame and  
7 analytic horizon are fundamentally the same. We used a time horizon of five years. This analysis  
8 was performed from the hospital's perspective. Our study aims to address the following question:  
9  
10 is implementation of this quality improvement programme to decrease central line-associated  
11  
12 bloodstream infections in the intensive care unit a cost-effective approach when compared with  
13  
14 current practice in US hospitals?  
15  
16  
17  
18  
19  
20  
21  
22  
23  
24

### 25 **Quality improvement programme**

26  
27 Details of the programme and its conceptual approach have been described  
28 elsewhere.[20-22] In brief, this multifaceted programme employed clinician communication  
29 tools, teamwork, and safety culture assessment and improvement tools (known as the  
30 Comprehensive Unit-based Safety Program [CUSP]), and a five-item, evidence-based checklist  
31 for correctly inserting central venous catheters. The five components of the checklist included  
32 using basic hand hygiene, exercising full barrier precautions, cleaning the skin with  
33 chlorhexidine, avoiding the femoral site when possible, and removing any unnecessary catheters.  
34  
35 A model for translating evidence into practice identified and mitigated local barriers to  
36 implementation of the checklist.[22]  
37  
38  
39  
40  
41  
42  
43  
44  
45  
46  
47

48 Quarterly infection rates measured at the intensive care unit level were used to monitor  
49 progress toward the goal of reducing central line-associated bloodstream infections. The  
50 remainder of this paper uses the phrase "bloodstream infection" to refer to central line-associated  
51 bloodstream infection.  
52  
53  
54  
55  
56  
57  
58  
59  
60



## Model inputs

Table 1 shows the key parameters used in the decision tree model, such as probabilities and cost inputs as well as the effectiveness of the programme, which are described in detail in the following sections.

**Table 1 | Parameters used in the decision tree model**

| Parameter                                                   | Distribution                                     | Source |
|-------------------------------------------------------------|--------------------------------------------------|--------|
| Probability of bloodstream infection*                       | Beta: 0.052 (SD 0.0074)                          | 18,25  |
| Death attributable to bloodstream infection                 | Beta: 0.15 (SD 0.056)                            | 3,6    |
| Incidence rate ratio of programme versus non-programme ICUs | Lognormal based on normal mean 0.19 (SD 0.13)    | 13     |
| <b>Total cost (\$):</b>                                     |                                                  |        |
| Bloodstream infection (per patient)†                        | Lognormal based on normal mean 18,793 (SD 5,533) | 39     |
| Programme (per patient)†                                    | Lognormal based on normal mean 540 (SD 120)      | 29     |

ICU = intensive care unit

\*Conditional probability of a bloodstream infection given exposure to a central venous catheter, assumes standard (non-antimicrobial) catheter.

†Discounted costs presented

### Risk of bloodstream infection and death

Estimates of the risk of bloodstream infection given exposure to a central venous catheter varied from 3.0% to as much as 16.0%. [23 24] We used a probability estimate of 5.2% for a standard catheter, derived from a meta analysis of 13 randomised controlled trials from a previous economic evaluation. [18 25] Estimates of the attributable mortality of bloodstream infections ranged from 14 to 40%. [5 6 26 27] We used a point estimate of 15%.

### Costs

Estimates of payer costs attributable to bloodstream infections varied widely, from as little as \$6,000 to over \$56,000. [4 6 18 28] The reasons for this variation can be attributed to the

1  
2  
3 small sample sizes of studies, challenges allocating inpatient costs, perspectives used, the types  
4 of cost categories included, and the methodology used for estimation.[29] Existing studies have  
5 largely focused on financial costs (or hospital charges or payer costs) rather than opportunity  
6 costs and so they may incorrectly estimate the economic cost of bloodstream infections to  
7 hospitals. We considered the economic cost of bloodstream infections in terms of the increased  
8 length of stay and variable costs associated with that occurrence.[30] Given that a significant  
9 amount of hospital costs are fixed in the short run, the economic viability of quality improvement  
10 programmes that reduce bloodstream infections rests on two things: deploying the bed-days freed  
11 by shorter lengths of stay for new admissions and reducing utilization of medications and  
12 supplies. The value of the new admissions, (the potential incremental net revenue opportunity  
13 per prevented infection) represents the economic cost of infection and accordingly, the potential  
14 economic cost avoidance resulting from infection prevention.[31] Using this approach, we  
15 estimated that the discounted cost of a bloodstream infection was \$18,793 (see the appendix for  
16 details of this calculation).

17  
18 Start-up costs and recurring costs associated with the quality improvement programme  
19 were assigned using an activity-based micro-costing of the programme performed in six hospitals  
20 in Michigan.[29] We assumed that start-up costs occurred in the first year of implementation and  
21 did not discount them. Capital items, such as bloodstream infection line carts, were annualised  
22 assuming a five-year useful life and 3% discount rate. We included the opportunity costs of key  
23 personnel whose time was committed to the programme even though a hospital may not incur  
24 any financial costs related to personnel who are already on staff. We estimated this cost by  
25 multiplying each staff person's percentage effort committed to the programme by an estimate of  
26 that position's annual compensation. We used the Society of Critical Care Medicine's annual  
27  
28  
29  
30  
31  
32  
33  
34  
35  
36  
37  
38  
39  
40  
41  
42  
43  
44  
45  
46  
47  
48  
49  
50  
51  
52  
53  
54  
55  
56  
57  
58  
59  
60

compensation estimates from 2009 for critical care physicians, nurses, pharmacists, and respiratory therapists.[32] The salary for infection control preventionists was based on the Bureau of Labor Statistics's 2011 Occupational Employment Statistics and we added 30% benefits. All compensation figures were adjusted to 2013 US dollars using the Consumer Price Index for medical care services. Table 2 presents a detailed itemisation of the start-up costs and recurring costs of the programme. Start-up costs were approximately \$80,000 and recurring costs were approximately \$192,000 per hospital per year. Personnel costs were the largest contributor, comprising 95% of start-up costs and 89% of recurring costs.

**Table 2 | Itemisation of programme costs (per hospital)**

| Cost category                                                      | Start-up costs | Recurring costs* |
|--------------------------------------------------------------------|----------------|------------------|
| Personnel (\$)                                                     |                |                  |
| Critical care physicians (2 on average per hospital)               | 26,004         | 71,953           |
| Nurses (8 on average per hospital)                                 | 44,406         | 75,306           |
| Respiratory therapists                                             | 4,605          | 7,923            |
| Infection control preventionists                                   | 1,981          | 7,855            |
| Pharmacists                                                        | 2,725          | 7,962            |
| Education and Training (\$)                                        |                |                  |
| Education and training expenses                                    | 3,579          |                  |
| Capital Items (\$)                                                 |                |                  |
| BSI line cart/central line insertion cart (annual equivalent cost) | 426            | 426              |
| Materials (\$)                                                     |                |                  |
| Chlorohexidine                                                     |                | 2,378            |
| Oral care kits                                                     |                | 6,933            |
| Sterile central line dressing kits                                 |                | 11,555           |
| <b>Total (\$)</b>                                                  | <b>83,725</b>  | <b>192,292</b>   |

BSI = bloodstream infection

\*Recurring costs occur each year that the intervention is in place; as such, this total represents the annual recurring cost (not discounted as presented here).

We estimated a per patient cost of the programme by deriving an average number of intensive care unit patients per hospital who had central venous catheters (the patients most

1  
2  
3 likely to benefit from the programme's prevention efforts) based on published estimates and the  
4 American Hospital Association's Annual Survey of Hospitals, yielding \$540 per patient (see the  
5 appendix for details of this calculation).[33 34]  
6  
7

8  
9 All costs were adjusted to 2013 US dollars. Recurring costs were discounted by 3%  
0 annually. In separate sensitivity analyses, we examined the effect of not discounting costs and of  
1 discounting costs by 5%.  
2  
3  
4  
5  
6  
7

## 8 9 Effectiveness

20  
21 We based our estimate of the programme's effectiveness on a cluster randomised  
22 controlled trial that found an 81% reduction in bloodstream infection rates comparing  
23 programme intensive care units to control intensive care units.[13] This effectiveness parameter  
24 was measured at the intensive care unit level but in our model we assumed that it applied to  
25 individual patients (considering all intensive care unit patients together). This ecological  
26 assumption is necessary because there are no patient level effectiveness estimates available from  
27 the Keystone ICU project. Its uncertainty range captures the heterogenic reality among intensive  
28 care unit patients that the intervention benefit is not uniform. The base case probability of a  
29 bloodstream infection in the programme arm of the decision tree is adjusted by multiplying by  
30 the incidence rate ratio (0.19) from the trial. We assumed that by the end of the first year of  
31 implementation, programme intensive care units achieve this reduction. The original intensive  
32 care units that implemented the programme maintained the reduction for the subsequent 10 years  
33 (Sam Watson, written communication, August 18, 2013). We assumed this to be true for the  
34 five-year period used in this evaluation.[35]  
35  
36  
37  
38  
39  
40  
41  
42  
43  
44  
45  
46  
47  
48  
49  
50  
51  
52  
53  
54  
55  
56  
57  
58  
59  
60

1  
2  
3 The number of annual intensive care unit admissions requiring catheters, the probability  
4 of infection, and the attributable mortality parameters were assumed not to change during the  
5 five-year period.  
6  
7  
8  
9

### 10 11 12 **Outcome measures**

13 The outcomes of interest were bloodstream infections prevented and deaths averted due  
14 to bloodstream infections prevented. We calculated the number of bloodstream infections  
15 prevented by determining the difference in the number of bloodstream infections between  
16 programme and non-programme intensive care units. Deaths averted were calculated similarly.  
17 We did not discount bloodstream infections or deaths in the base case analysis to avoid making  
18 the ethically challenging assumption that infections or deaths prevented in the future are worth  
19 less than they are in the present. We explored the effect of discounting bloodstream infections  
20 and deaths by 3% in a sensitivity analysis.  
21  
22  
23  
24  
25  
26  
27  
28  
29  
30  
31  
32  
33

34 We calculated incremental cost effectiveness ratios as the additional cost divided by the  
35 additional health benefit comparing the programme to current practice.  
36  
37  
38  
39

### 40 41 **Probabilistic sensitivity analyses**

42 We conducted a probabilistic sensitivity analysis to account for uncertainty in the  
43 model's input parameters. We used Monte Carlo simulation to perform 10,000 iterations of the  
44 model, simultaneously sampling each parameter from an underlying distribution that reflects the  
45 degree of uncertainty in the parameter estimate. Table 1 presents the uncertainty ranges applied  
46 to key model parameters. All analyses were performed using Microsoft Excel (Microsoft  
47 Corporation; Redmond, WA) with @Risk (Palisade Corporation; Ithaca, NY).  
48  
49  
50  
51  
52  
53  
54  
55  
56  
57  
58  
59  
60

## RESULTS

The quality improvement programme reduces bloodstream infections and deaths at no additional cost in the base case analysis and represents a dominant strategy when compared with current practice. Table 3 compares programme and non-programme intensive care unit costs and outcomes for bloodstream infections prevented and deaths prevented.

**Table 3 | Comparison of costs and outcomes between programme and non-programme intensive care units (ICUs)**

|                                                     | Mean                                  | Median   | 2.5 <sup>th</sup> – 97.5 <sup>th</sup> Percentile |
|-----------------------------------------------------|---------------------------------------|----------|---------------------------------------------------|
| <b>Non-programme ICU</b>                            |                                       |          |                                                   |
| Bloodstream infections                              | 52                                    | 52       | 39 – 66                                           |
| Deaths                                              | 8                                     | 8        | 2 – 14                                            |
| Costs (S)*                                          | 987,000                               | 937,000  | 488,000 – 1,760,000                               |
| <b>Programme ICU</b>                                |                                       |          |                                                   |
| Bloodstream infections                              | 10                                    | 9        | 3 – 29                                            |
| Deaths                                              | 2                                     | 1        | 0 – 5                                             |
| Costs (\$)*                                         | 738,000                               | 710,000  | 453,000 – 1,190,000                               |
| <b>Benefit of programme<sup>†</sup></b>             |                                       |          |                                                   |
| Bloodstream infections prevented                    | 42                                    | 42       | 23 – 58                                           |
| Deaths prevented                                    | 6                                     | 6        | 2 – 12                                            |
| Net costs (\$)                                      | -249,000                              | -221,000 | -976,000 – 300,000                                |
| <b>Incremental cost effectiveness ratio (Prob.)</b> |                                       |          |                                                   |
| Cost per infection prevented                        | Strongly dominant (0.80) <sup>‡</sup> |          |                                                   |
| Cost per death prevented                            | Strongly dominant (0.80) <sup>‡</sup> |          |                                                   |

Mean, median, 2.5% and 97.5% centile estimates for outputs from probabilistic sensitivity analysis of 10,000 model runs representing uncertainty in epidemiologic and economic parameters are reported. All mean, median, and percentile values are expressed per 1,000 patients to make the scale easier to interpret. Values have been rounded to 3 significant digits at most.

\*Costs are not presented separately for each outcome (bloodstream infection and death) because no additional cost was assumed to occur for death; discounted at 3%.

<sup>†</sup>Benefit of programme determined by subtracting programme ICU estimates from non-programme ICU estimates within the model

<sup>‡</sup>Probability that the programme is more effective and less costly than current practice

1  
2  
3  
4  
5  
6  
7  
8  
9  
10  
11  
12  
13  
14  
15  
16  
17  
18  
19  
20  
21  
22  
23  
24  
25  
26  
27  
28  
29  
30  
31  
32  
33  
34  
35  
36  
37  
38  
39  
40  
41  
42  
43  
44  
45  
46  
47  
48  
49  
50  
51  
52  
53  
54  
55  
56  
57  
58  
59  
60

Figure 2 and online supplementary Figure S3 show the cost effectiveness planes comparing the joint density of incremental costs and incremental effects for 10,000 model iterations. Incremental refers to the difference in costs or effects between programme and non-programme intensive care units. The scatterplot illustrates the uncertainty surrounding the estimates of expected incremental cost and expected incremental effect (bloodstream infections prevented or deaths prevented) associated with the quality improvement programme compared to current practice.

Figure 2 shows that the mean point estimate for the difference in costs and effects between the programme and current practice is -\$249,000 with 42 infections prevented per 1,000 patients. The location of the incremental cost-effect pairs indicates that there is limited uncertainty regarding the effectiveness of the programme, yet there is uncertainty regarding the number of infections prevented. For costs, the location and spread of points indicate uncertainty in the existence and magnitude of economic cost savings. In Figure S3, the mean point estimate for the difference in costs and effects between the programme and current practice is -\$249,000 with 6 deaths prevented per 1,000 patients. There is similar uncertainty in the magnitude of deaths prevented and the existence and magnitude of cost savings. For both bloodstream infections prevented and deaths prevented, about 80% of the incremental cost-effect pairs fall below the horizontal axis, indicating that the programme is incrementally less costly and more effective than current practice (base case). The remaining 20% of points fall above the horizontal axis, indicating that the programme is incrementally more costly and more effective. The 95% confidence ellipses are calculated assuming a bivariate normal distribution and display the uncertainty surrounding incremental costs and effects. The ellipses cross the horizontal axis, indicating less than 95% confidence that the intervention is dominant.

1  
2  
3 Online supplementary figures S4 and S5 display tornado diagrams of the results of the  
4 probabilistic sensitivity analysis. The opportunity cost of bloodstream infections exerted the  
5 largest influence on the cost effectiveness of the programme for preventing bloodstream  
6 infections and deaths. As such, hospitals implementing the programme should know the  
7 opportunity costs they face due to bloodstream infections. The opportunity cost is calculated as  
8 the potential incremental net revenue opportunity per prevented infection. We provide an  
9 example of how to perform this calculation in the appendix. Discounting bloodstream infections  
10 or deaths at 3% in addition to costs, does not change the interpretation of our results. Similarly,  
11 discounting costs at 0% or 5% does not change the interpretation of our findings (see  
12 supplementary Table D).  
13  
14  
15  
16  
17  
18  
19  
20  
21  
22  
23  
24  
25  
26  
27  
28

## 29 **DISCUSSION**

30  
31 This study represents the first formal cost effectiveness analysis of a nationally  
32 implemented quality improvement programme (the Keystone ICU project) in the US to decrease  
33 bloodstream infections in critically ill patients. One of the few large scale quality improvement  
34 projects to demonstrate long term sustainability, this programme has the potential to reduce  
35 bloodstream infections and deaths at no additional cost to US hospitals.  
36  
37  
38  
39  
40  
41  
42  
43

### 44 **Comparison with other studies**

45  
46 Previous studies highlight both the importance and difficulty of developing a business  
47 case for quality improvement. A business case exists if healthcare organisations investing in an  
48 intervention reap a return on their investment.[36] Many prevention initiatives have suffered  
49 from a lack of evidence supporting a positive return on investment for hospitals and payers.[37]  
50  
51  
52  
53  
54  
55  
56  
57  
58  
59  
60  
61  
62  
63  
64  
65  
66  
67  
68  
69  
70  
71  
72  
73  
74  
75  
76  
77  
78  
79  
80  
81  
82  
83  
84  
85  
86  
87  
88  
89  
90  
91  
92  
93  
94  
95  
96  
97  
98  
99  
100  
101  
102  
103  
104  
105  
106  
107  
108  
109  
110  
111  
112  
113  
114  
115  
116  
117  
118  
119  
120  
121  
122  
123  
124  
125  
126  
127  
128  
129  
130  
131  
132  
133  
134  
135  
136  
137  
138  
139  
140  
141  
142  
143  
144  
145  
146  
147  
148  
149  
150  
151  
152  
153  
154  
155  
156  
157  
158  
159  
160  
161  
162  
163  
164  
165  
166  
167  
168  
169  
170  
171  
172  
173  
174  
175  
176  
177  
178  
179  
180  
181  
182  
183  
184  
185  
186  
187  
188  
189  
190  
191  
192  
193  
194  
195  
196  
197  
198  
199  
200  
201  
202  
203  
204  
205  
206  
207  
208  
209  
210  
211  
212  
213  
214  
215  
216  
217  
218  
219  
220  
221  
222  
223  
224  
225  
226  
227  
228  
229  
230  
231  
232  
233  
234  
235  
236  
237  
238  
239  
240  
241  
242  
243  
244  
245  
246  
247  
248  
249  
250  
251  
252  
253  
254  
255  
256  
257  
258  
259  
260  
261  
262  
263  
264  
265  
266  
267  
268  
269  
270  
271  
272  
273  
274  
275  
276  
277  
278  
279  
280  
281  
282  
283  
284  
285  
286  
287  
288  
289  
290  
291  
292  
293  
294  
295  
296  
297  
298  
299  
300  
301  
302  
303  
304  
305  
306  
307  
308  
309  
310  
311  
312  
313  
314  
315  
316  
317  
318  
319  
320  
321  
322  
323  
324  
325  
326  
327  
328  
329  
330  
331  
332  
333  
334  
335  
336  
337  
338  
339  
340  
341  
342  
343  
344  
345  
346  
347  
348  
349  
350  
351  
352  
353  
354  
355  
356  
357  
358  
359  
360  
361  
362  
363  
364  
365  
366  
367  
368  
369  
370  
371  
372  
373  
374  
375  
376  
377  
378  
379  
380  
381  
382  
383  
384  
385  
386  
387  
388  
389  
390  
391  
392  
393  
394  
395  
396  
397  
398  
399  
400  
401  
402  
403  
404  
405  
406  
407  
408  
409  
410  
411  
412  
413  
414  
415  
416  
417  
418  
419  
420  
421  
422  
423  
424  
425  
426  
427  
428  
429  
430  
431  
432  
433  
434  
435  
436  
437  
438  
439  
440  
441  
442  
443  
444  
445  
446  
447  
448  
449  
450  
451  
452  
453  
454  
455  
456  
457  
458  
459  
460  
461  
462  
463  
464  
465  
466  
467  
468  
469  
470  
471  
472  
473  
474  
475  
476  
477  
478  
479  
480  
481  
482  
483  
484  
485  
486  
487  
488  
489  
490  
491  
492  
493  
494  
495  
496  
497  
498  
499  
500  
501  
502  
503  
504  
505  
506  
507  
508  
509  
510  
511  
512  
513  
514  
515  
516  
517  
518  
519  
520  
521  
522  
523  
524  
525  
526  
527  
528  
529  
530  
531  
532  
533  
534  
535  
536  
537  
538  
539  
540  
541  
542  
543  
544  
545  
546  
547  
548  
549  
550  
551  
552  
553  
554  
555  
556  
557  
558  
559  
560  
561  
562  
563  
564  
565  
566  
567  
568  
569  
570  
571  
572  
573  
574  
575  
576  
577  
578  
579  
580  
581  
582  
583  
584  
585  
586  
587  
588  
589  
590  
591  
592  
593  
594  
595  
596  
597  
598  
599  
600  
601  
602  
603  
604  
605  
606  
607  
608  
609  
610  
611  
612  
613  
614  
615  
616  
617  
618  
619  
620  
621  
622  
623  
624  
625  
626  
627  
628  
629  
630  
631  
632  
633  
634  
635  
636  
637  
638  
639  
640  
641  
642  
643  
644  
645  
646  
647  
648  
649  
650  
651  
652  
653  
654  
655  
656  
657  
658  
659  
660  
661  
662  
663  
664  
665  
666  
667  
668  
669  
670  
671  
672  
673  
674  
675  
676  
677  
678  
679  
680  
681  
682  
683  
684  
685  
686  
687  
688  
689  
690  
691  
692  
693  
694  
695  
696  
697  
698  
699  
700  
701  
702  
703  
704  
705  
706  
707  
708  
709  
710  
711  
712  
713  
714  
715  
716  
717  
718  
719  
720  
721  
722  
723  
724  
725  
726  
727  
728  
729  
730  
731  
732  
733  
734  
735  
736  
737  
738  
739  
740  
741  
742  
743  
744  
745  
746  
747  
748  
749  
750  
751  
752  
753  
754  
755  
756  
757  
758  
759  
760  
761  
762  
763  
764  
765  
766  
767  
768  
769  
770  
771  
772  
773  
774  
775  
776  
777  
778  
779  
780  
781  
782  
783  
784  
785  
786  
787  
788  
789  
790  
791  
792  
793  
794  
795  
796  
797  
798  
799  
800  
801  
802  
803  
804  
805  
806  
807  
808  
809  
810  
811  
812  
813  
814  
815  
816  
817  
818  
819  
820  
821  
822  
823  
824  
825  
826  
827  
828  
829  
830  
831  
832  
833  
834  
835  
836  
837  
838  
839  
840  
841  
842  
843  
844  
845  
846  
847  
848  
849  
850  
851  
852  
853  
854  
855  
856  
857  
858  
859  
860  
861  
862  
863  
864  
865  
866  
867  
868  
869  
870  
871  
872  
873  
874  
875  
876  
877  
878  
879  
880  
881  
882  
883  
884  
885  
886  
887  
888  
889  
890  
891  
892  
893  
894  
895  
896  
897  
898  
899  
900  
901  
902  
903  
904  
905  
906  
907  
908  
909  
910  
911  
912  
913  
914  
915  
916  
917  
918  
919  
920  
921  
922  
923  
924  
925  
926  
927  
928  
929  
930  
931  
932  
933  
934  
935  
936  
937  
938  
939  
940  
941  
942  
943  
944  
945  
946  
947  
948  
949  
950  
951  
952  
953  
954  
955  
956  
957  
958  
959  
960  
961  
962  
963  
964  
965  
966  
967  
968  
969  
970  
971  
972  
973  
974  
975  
976  
977  
978  
979  
980  
981  
982  
983  
984  
985  
986  
987  
988  
989  
990  
991  
992  
993  
994  
995  
996  
997  
998  
999  
1000



1  
2  
3 programmes while payers accrue the subsequent cost savings. A financial analysis of a  
4 replication of the Keystone ICU project in one tertiary hospital in Hawaii demonstrated that  
5 reducing bloodstream infections actually resulted in lower profit margins, thus creating a  
6  
7  
8  
9  
0  
1  
2  
3  
4  
5  
6  
7  
8  
9  
20  
21  
22  
23  
24  
25  
26  
27  
28  
29  
0  
3  
4  
5  
6  
7  
8  
9  
40  
41  
42  
43  
44  
45  
46  
47  
48  
49  
50  
51  
52

perverse incentive to provide a lower quality of care.[38] A different study calculated that, for every bloodstream infection prevented, the programme costs \$5,404,[29] and suggested that it is cost saving when compared to the cost of an infection (which ranges from \$6,000 to over \$56,000[4 6 39-41]). However, both studies used inaccurate cost analyses that focused on the financial rather than the economic costs of bloodstream infections. These studies also did not account for uncertainty in the cost or effect estimates.

Our evaluation offers several improvements to these existing studies. First, whenever possible we used nationally representative data to determine provider salary and compensation costs, so as to increase the ability to generalise our findings. Second, we performed a probabilistic sensitivity analysis to quantify the uncertainty in our cost effectiveness estimates. Third, we considered the opportunity costs of bloodstream infections rather than financial costs. Our estimate of the cost of a bloodstream infection is based on the foregone hospital revenue that results whenever an infection occurs. From the perspective of the hospital, reducing the cost of bloodstream infections is tantamount to reducing this foregone revenue by redeploying intensive care unit beds for new admissions. Finally, we extended the evaluation to consider deaths prevented as an additional outcome because of its interest to clinicians and patients.

### 53 54 55 56 57 58 59 60 61

#### **Limitations of the study**

This evaluation has several limitations. First, the impact of patient heterogeneity, such as demographics and clinical characteristics on baseline risk, treatment effect, or resource

1  
2  
3 utilisation was not fully explored.[42] This evaluation sought instead to represent an average  
4  
5 intensive care unit experience, in part because the data needed to explore subgroups are not  
6  
7 available, but more importantly because the intervention applies to patients irrespective of these  
8  
9 differences. It would be impractical—and possibly unethical—to only use this programme in  
0  
1 subgroups of patients for whom greater benefit is expected. The programme is based on  
2  
3 evidence-based practices for inserting central venous catheters—practices that should apply  
4  
5 equally to all patients. Second, we did not evaluate costs outside the hospital setting, such as  
6  
7 rehabilitation costs or productivity losses for delays returning to work incurred by patients  
8  
9 suffering bloodstream infections. However, doing so would further support the cost effectiveness  
20  
21 of the programme. We chose to examine costs from the perspective of the hospital because  
22  
23 hospitals bear the greatest burden of nosocomial infection costs in the prospective payer system  
24  
25 and demonstrating a business case is important for the dissemination of effective quality  
26  
27 improvement programmes. Finally, this evaluation did not explore the use of antimicrobial  
28  
29 catheters as a comparator because systematic reviews have come to differing conclusions about  
0  
1 the extent of their effectiveness in preventing bloodstream infections, and many of the trials have  
2  
3 been small and of a low quality.[43 44] In addition, the choice facing hospital decision makers is  
4  
5 not necessarily a mutually exclusive choice between the Keystone ICU project or the use of  
6  
7 antimicrobial catheters. The results of Keystone ICU project already reflect the use of various  
8  
9 types of catheters because the programme itself did not specify catheter type. The parameter  
40  
41 estimate for effectiveness of the programme used in this evaluation was derived from a cluster  
42  
43 randomised controlled trial. In this setting it can be expected that the utilisation of antimicrobial  
44  
45 catheters should be balanced between the intervention and control arms of the trial (though this  
46  
47 was not explicitly measured), and the effectiveness estimate is attributable to the quality  
48  
49  
50  
51  
52  
53  
54  
55  
56  
57  
58  
59  
60

1  
2  
3 improvement programme itself. The Keystone ICU project quality improvement programme is  
4 also a complex social intervention. Comparing it directly to technology or a device understates  
5 its broader effects, which may include reductions in sepsis and ventilator-associated pneumonia  
6 or reduced staff turnover resulting from an improved safety culture.[21] Data for these effects are  
7 limited in comparison to the data available for bloodstream infections, but recent evidence  
8 suggests that the Keystone ICU project significantly reduced rates of ventilator associated  
9 pneumonia in Michigan ICUs.[9] Inclusion of these additional beneficial effects for the same set  
0 of costs would further support the cost effectiveness of the programme.  
1  
2  
3  
4  
5  
6  
7  
8  
9  
20  
21  
22

### 23 **Conclusions and implications of study findings**

24  
25 These findings have important implications for health care. Broad implementation of the  
26 Keystone ICU project in the US healthcare system could substantially reduce the morbidity and  
27 mortality associated with bloodstream infections and their economic costs to hospitals. Although  
28 the Centers for Disease Control and Prevention has demonstrated that significant reductions in  
29 bloodstream infections are indeed being realised for intensive care patients in the US,[45] over  
0 800 medium and large hospitals continue to have high bloodstream infection rates.[46] Further  
1 dissemination of cost effective quality improvement programmes is needed. Although our  
2 analysis adopted a hospital perspective, payers also stand to benefit from the programme and can  
3 support dissemination efforts. Hospitals and payers should partner to reform the incentive  
4 structure facing hospitals in order to better support patient safety and quality. Payer support, such  
5 as covering or funding some intervention costs and imposing financial penalties on hospitals  
6 when patients develop bloodstream infections, could encourage uptake and dissemination of the  
7 programme. Future evaluations of this quality improvement programme in non-US settings can  
8  
9  
40  
41  
42  
43  
44  
45  
46  
47  
48  
49  
50  
51  
52  
53  
54  
55  
56  
57  
58  
59  
6

1  
2  
3 incorporate country specific costs or extend the evaluation to consider additional outcomes, such  
4  
5 as cases of ventilator-associated pneumonia prevented.  
6  
7

8 To conclude, this multifaceted quality improvement programme, currently being  
9  
0 implemented by thousands of hospitals in the US, likely reduces unnecessary morbidity,  
1  
2 mortality, and economic costs associated with central line-associated bloodstream infections.  
3  
4

5  
6  
7  
8  
9  
20  
21  
22  
23  
24  
25  
26  
27  
28  
29  
0  
3  
2  
3  
3  
5  
6  
3  
8  
9  
40  
41  
42  
43  
44  
45  
46  
47  
48  
49  
50  
51  
52  
53  
54  
55  
56  
57  
58  
59  
6

For peer review only

1  
2  
3 **Acknowledgements:** We thank Susan M. Turley for her assistance in editing the manuscript.  
4  
5  
6

7  
8 **Contributors:** KRH is the guarantor and had full access to all of the data in the study and takes  
9 responsibility for the integrity of the data and the accuracy of the data analysis. All the authors  
0 were involved in preparing this manuscript. KRH was responsible for the overall study design,  
1 data analysis, and interpretation of data, and wrote the initial draft of the manuscript. All other  
2 authors contributed to the study design, analysis and interpretation of data, and critical revision  
3 of the manuscript. LN, DOC, WJW, and PJP also provided supervision.  
4  
5  
6  
7  
8  
9  
20  
21  
22  
23

24 The study guarantor affirms that the manuscript is an honest, accurate, and transparent account of  
25 the study being reported; that no important aspects of the study have been omitted; and that any  
26 discrepancies from the study as planned (and, if relevant, registered) have been explained.  
27  
28  
29  
0

1 **Funding:** This study was conducted as part of KRH's doctoral training at the Johns Hopkins  
2 Bloomberg School of Public Health. KRH is supported by the Harry S. Truman Scholarship  
3 Foundation and by a training grant from the National Institutes of Health under award number  
4 T32 GM007309. The content is solely the responsibility of the authors and does not necessarily  
5 represent the official views of the National Institutes of Health. All of the researchers were  
6 independent of the sponsors, and neither sponsor had any influence over the study design;  
7 collection, analysis, or interpretation of the data; writing of the manuscript; or decision to submit  
8 it for publication.  
9  
40  
41  
42  
43  
44  
45  
46  
47  
48  
49  
50  
51  
52  
53  
54  
55  
56  
57  
58  
59  
6

1  
2  
3 **Role of the Sponsors:** The Truman Scholarship Foundation and the National Institutes of  
4 Health had played no direct role in any aspect of this study. The researchers were independent of  
5 the sponsors and neither sponsor had any influence over the study design, collection, analysis or  
6 interpretation of the data, writing of the manuscript, or decision to submit it for publication.  
7  
8  
9  
0  
1

2  
3  
4  
5 **Competing interests:** All authors have completed the Unified Competing Interest form at  
6 [www.icmje.org/coi\\_disclosure.pdf](http://www.icmje.org/coi_disclosure.pdf) (available on request from the corresponding author) and  
7 declare that they had (1) No financial support for the submitted work. (2) PJP reports: receiving  
8 grant or contract support from the Agency for Healthcare Research and Quality, the Gordon and  
9 Betty Moore Foundation (research related to patient safety and quality of care), the National  
20 Institutes of Health (acute lung injury research), and the American Medical Association Inc.  
21 (improve blood pressure control); honoraria from various healthcare organizations for speaking  
22 on patient safety and quality (the Leigh Bureau manages most of these engagements); and book  
23 royalties from the Penguin Group for his book *Safe Patients, Smart Hospitals*. Dr. Pronovost is a  
24 paid strategic advisor to the Gordon and Betty Moore Foundation; receives stock and fees to  
25 serve as a director for Cantel Medical; and is a founder of *Patient Doctor Technologies*, a startup  
26 company that seeks to enhance the partnership between patients and clinicians with an  
27 application called Doctella; (3) No spouses, partners, or children with relationships with  
28 commercial entities that might have an interest in the submitted work and (4) No non-financial  
29 interests that may be relevant to the submitted work.  
30  
31  
32  
33  
34  
35  
36  
37  
38  
39  
40  
41  
42  
43  
44  
45  
46  
47  
48  
49  
50  
51  
52

53 **Ethics approval:** Not required.  
54  
55  
56  
57  
58  
59  
60



## Figure legends

Figure 1 | Decision tree model. Decision tree model depicting programme versus no programme and its effects on outcomes in intensive care unit (ICU) patients. “Bloodstream infections” refers to central line-associated bloodstream infection.

Figure 2 | Cost effectiveness plane for bloodstream infections prevented with 95% confidence ellipses. Values on both axes have been multiplied by 1,000 to yield incremental costs and effects expressed per 1,000 patients to aid interpretation. Incremental refers to the difference in costs or effects between programme and non-programme intensive care units. Cost values in US dollars. Boxes in the plot region display the percentage of the distribution of incremental cost-effectiveness ratios falling above or below \$0.



## References

1. Mermel LA. Prevention of intravascular catheter-related infections. *Ann Intern Med* 2000;132(5):391-402.
2. Burke JP. Infection control - a problem for patient safety. *N Engl J Med* 2003;348(7):651-6. doi: 10.1056/NEJMhpr020557.
3. Klevens RM, Edwards JR, Richards CL, Jr., *et al.* Estimating health care-associated infections and deaths in U.S. hospitals, 2002. *Public Health Rep* 2007;122(2):160-6.
4. O'Grady NP, Alexander M, Dellinger EP, *et al.* Guidelines for the prevention of intravascular catheter-related infections. *Infect Control Hosp Epidemiol* 2002;23(12):759-69. doi: 10.1086/502007.
5. Digiovine B, Chenoweth C, Watts C, *et al.* The attributable mortality and costs of primary nosocomial bloodstream infections in the intensive care unit. *Am J Respir Crit Care Med* 1999;160(3):976-81. doi: 10.1164/ajrccm.160.3.9808145.
6. Pittet D, Tarara D, Wenzel RP. Nosocomial bloodstream infection in critically ill patients. Excess length of stay, extra costs, and attributable mortality. *JAMA* 1994;271(20):1598-601.
7. Pronovost P, Needham D, Berenholtz S, *et al.* An intervention to decrease catheter-related bloodstream infections in the ICU. *N Engl J Med* 2006;355(26):2725-32. doi: 10.1056/NEJMoa061115.
8. Berenholtz SM, Pronovost PJ, Lipsett PA, *et al.* Eliminating catheter-related bloodstream infections in the intensive care unit. *Crit Care Med* 2004;32(10):2014-20. doi: 10.1097/01.ccm.0000142399.70913.2f.

- 1  
2  
3  
4 9. Berenholtz SM, Pham JC, Thompson DA, *et al.* Collaborative cohort study of an intervention  
5  
6 to reduce ventilator-associated pneumonia in the intensive care unit. *Infect Control Hosp*  
7  
8 *Epidemiol* 2011;32(4):305-14. doi: 10.1086/658938.  
9
10. Lin DM, Weeks K, Bauer L, *et al.* Eradicating central line-associated bloodstream infections  
11  
12 statewide: the Hawaii experience. *Am J Med Qual* 2012;27(2):124-9. doi:  
13  
14 10.1177/1062860611414299.  
15
11. Lipitz-Snyderman A, Steinwachs D, Needham DM, *et al.* Impact of a statewide intensive  
16  
17 care unit quality improvement initiative on hospital mortality and length of stay:  
18  
19 retrospective comparative analysis. *BMJ* 2011;342:d219. doi: 10.1136/bmj.d219.  
20  
21  
22  
23
12. Bion J, Richardson A, Hibbert P, *et al.* 'Matching Michigan': a 2-year stepped interventional  
24  
25 programme to minimise central venous catheter-blood stream infections in intensive care  
26  
27 units in England. *BMJ Qual Saf* 2013;22(2):110-23. doi: 10.1136/bmjqs-2012-001325.  
28  
29  
30
13. Marsteller JA, Sexton JB, Hsu YJ, *et al.* A multicenter, phased, cluster-randomized  
31  
32 controlled trial to reduce central line-associated bloodstream infections in intensive care  
33  
34 units. *Crit Care Med* 2012;40(11):2933-9. doi: 10.1097/CCM.0b013e31825fd4d8.  
35  
36  
37
14. Niessen LW, Grijseels EW, Rutten FF. The evidence-based approach in health policy and  
38  
39 health care delivery. *Soc Sci Med* 2000;51(6):859-69.  
40  
41  
42
15. Grimshaw JM, Thomas RE, MacLennan G, *et al.* Effectiveness and efficiency of guideline  
43  
44 dissemination and implementation strategies. *Health Technol Assess* 2004;8(6):iii-iv, 1-  
45  
46  
47  
48 72.  
49
16. Hoomans T, Evers SM, Ament AJ, *et al.* The methodological quality of economic  
50  
51  
52  
53  
54  
55  
56  
57  
58  
59  
60 evaluations of guideline implementation into clinical practice: a systematic review of

- 1  
2  
3 empiric studies. *Value Health* 2007;10(4):305-16. doi: 10.1111/j.1524-  
4  
5 4733.2007.00175.x.  
6  
7  
8 17. Graves N, Harbarth S, Beyersmann J, *et al.* Estimating the cost of health care-associated  
9  
0 infections: mind your p's and q's. *Clin Infect Dis* 2010;50(7):1017-21. doi:  
1  
2 10.1086/651110.  
3  
4  
5 18. Veenstra DL, Saint S, Sullivan SD. Cost-effectiveness of antiseptic-impregnated central  
6  
7 venous catheters for the prevention of catheter-related bloodstream infection. *JAMA*  
8  
9 1999;282(6):554-60.  
20  
21  
22 19. Halton KA, Cook DA, Whitby M, *et al.* Cost effectiveness of antimicrobial catheters in the  
23  
24 intensive care unit: addressing uncertainty in the decision. *Crit Care* 2009;13(2):R35.  
25  
26 doi: 10.1186/cc7744.  
27  
28  
29 20. Pronovost P, Weast B, Rosenstein B, *et al.* Implementing and validating a comprehensive  
0  
1 unit-based safety program. *J Patient Saf* 2005;1(1):33-39.  
2  
3  
4 21. Pronovost PJ, Berenholtz SM, Goeschel C, *et al.* Improving patient safety in intensive care  
5  
6 units in Michigan. *J Crit Care* 2008;23(2):207-21. doi: 10.1016/j.jcrc.2007.09.002.  
7  
8  
9 22. Pronovost PJ, Berenholtz SM, Needham DM. Translating evidence into practice: a model for  
40  
41 large scale knowledge translation. *BMJ* 2008;337:a1714. doi: 10.1136/bmj.a1714.  
42  
43  
44 23. Fletcher S. Catheter-related bloodstream infection. *Contin Educ Anaesth Crit Care Pain*  
45  
46 2005;5(2):49-51. doi: 10.1093/bjaceaccp/mki011.  
47  
48  
49 24. Brun-Buisson C. New technologies and infection control practices to prevent intravascular  
50  
51 catheter-related infections. *Am J Respir Crit Care Med* 2001;164(9):1557-8. doi:  
52  
53 10.1164/ajrccm.164.9.2109051.  
54  
55  
56  
57  
58  
59  
6

- 1  
2  
3  
4  
5  
6  
7  
8  
9  
0  
1  
2  
3  
4  
5  
6  
7  
8  
9  
20  
21  
22  
23  
24  
25  
26  
27  
28  
29  
0  
3  
2  
3  
3  
5  
6  
7  
8  
9  
40  
41  
42  
43  
44  
45  
46  
47  
48  
49  
50  
51  
52  
53  
54  
55  
56  
57  
58  
59  
6
25. Veenstra DL, Saint S, Saha S, *et al.* Efficacy of antiseptic-impregnated central venous catheters in preventing catheter-related bloodstream infection: a meta-analysis. *JAMA* 1999;281(3):261-7.
26. Martin MA, Pfaller MA, Wenzel RP. Coagulase-negative staphylococcal bacteremia. Mortality and hospital stay. *Ann Intern Med* 1989;110(1):9-16.
27. Smith RL, Meixler SM, Simberkoff MS. Excess mortality in critically ill patients with nosocomial bloodstream infections. *Chest* 1991;100(1):164-7.
28. Arnow PM, Quimosing EM, Beach M. Consequences of intravascular catheter sepsis. *Clin Infect Dis* 1993;16(6):778-84.
29. Waters HR, Korn R, Jr., Colantuoni E, *et al.* The business case for quality: economic analysis of the Michigan Keystone Patient Safety Program in ICUs. *Am J Med Qual* 2011;26(5):333-9. doi: 10.1177/1062860611410685.
30. Graves N, Weinhold D, Tong E, *et al.* Effect of healthcare-acquired infection on length of hospital stay and cost. *Infect Control Hosp Epidemiol* 2007;28(3):280-92. doi: 10.1086/512642.
31. Graves N. Economics and preventing hospital-acquired infection. *Emerg Infect Dis* 2004;10(4):561-6. doi: 10.3201/eid1004.020754.
32. Society of Critical Care Medicine. *Compensation of Critical Care Professionals*: Society of Critical Care Medicine, 2009.
33. Wunsch H, Angus DC, Harrison DA, *et al.* Variation in critical care services across North America and Western Europe. *Crit Care Med* 2008;36(10):2787-93, e1-9. doi: 10.1097/CCM.0b013e318186aec8.

- 1  
2  
3  
4  
5  
6  
7  
8  
9  
0  
1  
2  
3  
4  
5  
6  
7  
8  
9  
20  
21  
22  
23  
24  
25  
26  
27  
28  
29  
0  
3  
2  
3  
3  
5  
6  
7  
8  
9  
40  
41  
42  
43  
44  
45  
46  
47  
48  
49  
50  
51  
52  
53  
54  
55  
56  
57  
58  
59  
6
34. American Hospital Association. *AHA Hospital Statistics. 2013 ed*: American Hospital Association, 2012.
35. Pronovost PJ, Goeschel CA, Colantuoni E, *et al*. Sustaining reductions in catheter related bloodstream infections in Michigan intensive care units: observational study. *BMJ* 2010;340:c309. doi: 10.1136/bmj.c309.
36. Leatherman S, Berwick D, Iles D, *et al*. The business case for quality: case studies and an analysis. *Health Aff (Millwood)* 2003;22(2):17-30.
37. Galvin RS, Delbanco S, Milstein A, *et al*. Has the leapfrog group had an impact on the health care market? *Health Aff (Millwood)* 2005;24(1):228-33. doi: 10.1377/hlthaff.24.1.228.
38. Hsu E, Lin D, Evans SJ, *et al*. Doing well by doing good: assessing the cost savings of an intervention to reduce central line-associated bloodstream infections in a Hawaii hospital. *Am J Med Qual* 2014;29(1):13-9. doi: 10.1177/1062860613486173.
39. Warren DK, Quadir WW, Hollenbeak CS, *et al*. Attributable cost of catheter-associated bloodstream infections among intensive care patients in a nonteaching hospital. *Crit Care Med* 2006;34(8):2084-9. doi: 10.1097/01.CCM.0000227648.15804.2D.
40. Halton K, Graves N. Economic evaluation and catheter-related bloodstream infections. *Emerg Infect Dis* 2007;13(6):815-23. doi: 10.3201/eid1306.070048.
41. Dimick JB, Pronovost PJ, Heitmiller RF, *et al*. Intensive care unit physician staffing is associated with decreased length of stay, hospital cost, and complications after esophageal resection. *Crit Care Med* 2001;29(4):753-8.
42. Grutters JP, Sculpher M, Briggs AH, *et al*. Acknowledging patient heterogeneity in economic evaluation : a systematic literature review. *Pharmacoeconomics* 2013;31(2):111-23. doi: 10.1007/s40273-012-0015-4.

- 1  
2  
3 43. Niel-Weise BS, Stijnen T, van den Broek PJ. Anti-infective-treated central venous catheters:  
4  
5 a systematic review of randomized controlled trials. *Intensive Care Med*  
6  
7 2007;33(12):2058-68. doi: 10.1007/s00134-007-0897-3.  
8  
9  
0  
1 44. Hockenhull JC, Dwan K, Boland A, *et al.* The clinical effectiveness and cost-effectiveness of  
2  
3 central venous catheters treated with anti-infective agents in preventing bloodstream  
4  
5 infections: a systematic review and economic evaluation. *Health Technol Assess*  
6  
7 2008;12(12):iii-iv, xi-xii, 1-154.  
8  
9  
20 45. Center for Disease Control and Prevention. *National and State Healthcare Association*  
21  
22 *Infections Progress Report*. Atlanta, 2014.  
23  
24  
25 46. Wise ME, Scott RD, 2nd, Baggs JM, *et al.* National estimates of central line-associated  
26  
27 bloodstream infections in critical care patients. *Infect Control Hosp Epidemiol*  
28  
29 2013;34(6):547-54. doi: 10.1086/670629.  
0  
1  
2  
3  
4  
5  
6  
7  
8  
9  
40  
41  
42  
43  
44  
45  
46  
47  
48  
49  
50  
51  
52  
53  
54  
55  
56  
57  
58  
59  
6

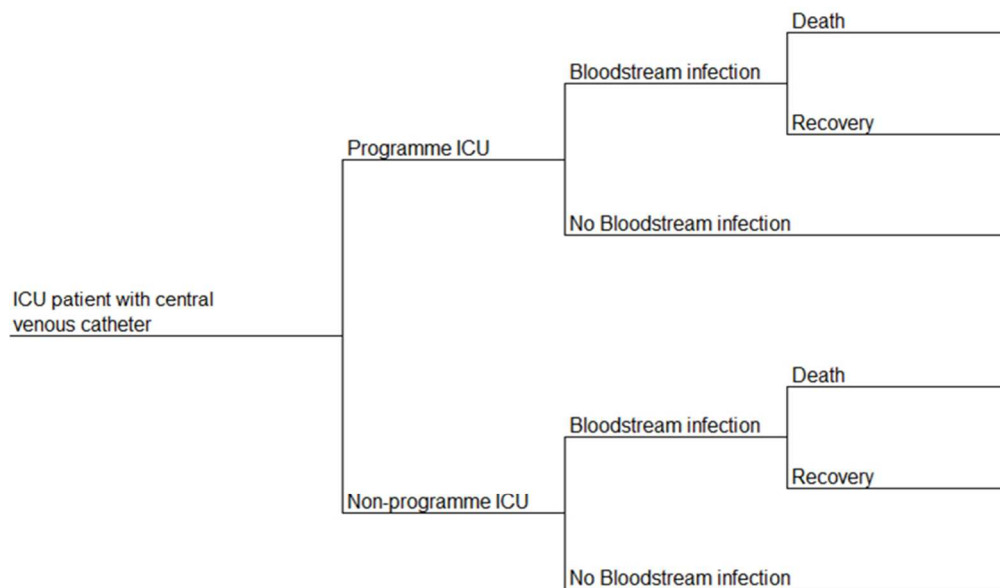

Figure 1 | Decision tree model depicting programme versus no programme and its effects on outcomes in intensive care unit (ICU) patients. "Bloodstream infections" refers to central line-associated bloodstream infection.

233x136mm (86 x 86 DPI)

Review only

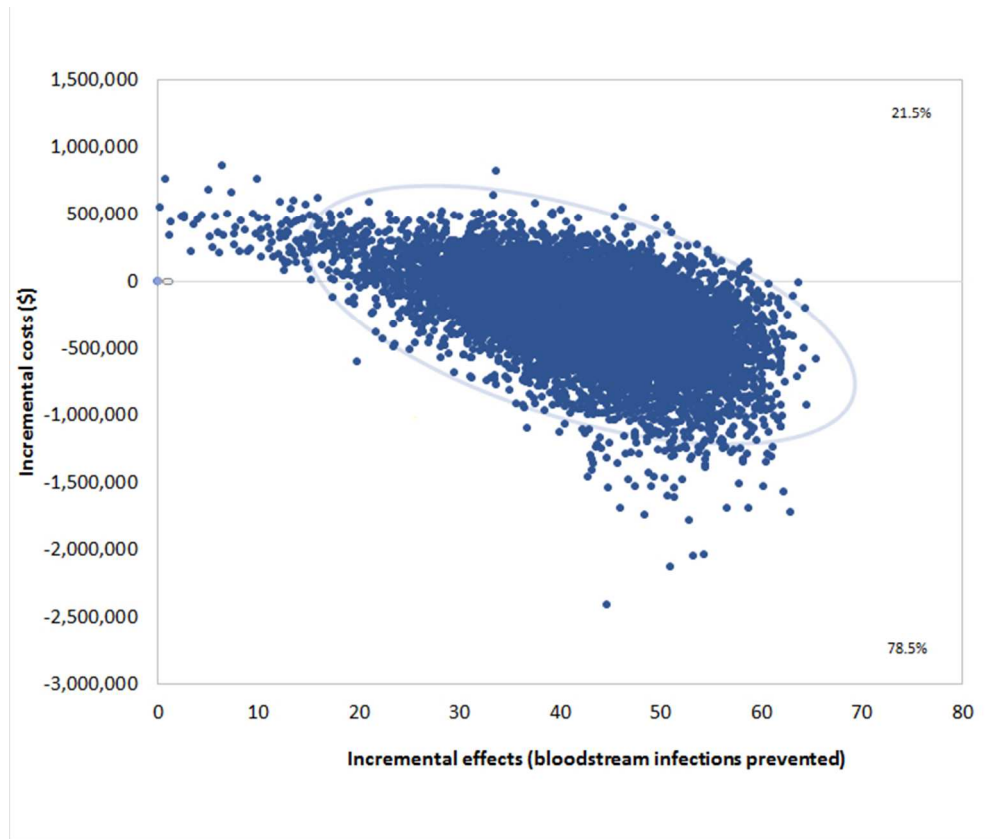

Figure 2 | Cost effectiveness plane for bloodstream infections prevented with 95% confidence ellipses. Values on both axes have been multiplied by 1,000 to yield incremental costs and effects expressed per 1,000 patients to aid interpretation. Incremental refers to the difference in costs or effects between programme and non-programme intensive care units. Cost values in US dollars. Boxes in the plot region display the percentage of the distribution of incremental cost-effectiveness ratios falling above or below \$0.

196x163mm (96 x 96 DPI)

only



## Web only appendices and tables

### Calculation of the economic cost of a bloodstream infection

As described in the main text, determining the economic cost of a bloodstream infection requires estimating the opportunity costs and variable costs associated with infection.[1] In this analysis, we do not consider the variable costs (e.g., medications and supplies) because they contribute less to the total economic cost than do the opportunity costs. In addition, the probabilistic sensitivity analysis accounts for the variability in the economic cost over a wide range.

The follow steps were taken to estimate the opportunity cost of bloodstream infection. Based on a recent meta analysis, the average attributable excess hospital length of stay for bloodstream infections is 10.4 days.[2] Dividing by the average length of stay for all discharges in acute care hospitals in the United States yields the potential incremental case throughput. Multiplying this potential case throughput per infection prevented by the national average net revenue per equivalent discharge results in a point estimate of \$19,617 (Table A). Using an economic interpretation, this represents the opportunity cost of lost revenue for a single infection. The results of the probabilistic analysis incorporating uncertainty in several of the parameters are displayed in Table 2. We then calculated the 5-year discounted cost of a bloodstream infection, which is the value used in the decision tree model described in the main text.

**Table A. Calculation of economic (opportunity) cost of a bloodstream infection**

|                                                                                                                                                                 | Value  | Calculation      | Uncertainty                                                                      | Source                   |
|-----------------------------------------------------------------------------------------------------------------------------------------------------------------|--------|------------------|----------------------------------------------------------------------------------|--------------------------|
| Average length of stay—all discharges (days)                                                                                                                    | 4.8    | A                |                                                                                  | CDC—NHDS                 |
| Excess total average length of stay attributable to bloodstream infection, i.e., the potential reduction in total length of stay per prevented infection (days) | 10.4   | B                | 6.9 to 15.2                                                                      | Zimlichman               |
| Potential incremental case throughput                                                                                                                           | 2.17   | $C = B/A$        |                                                                                  |                          |
| Median net revenue per equivalent discharge (\$)                                                                                                                | 9,054  | D                | 7,896 to 10,327 (25 <sup>th</sup> and 75 <sup>th</sup> percentile, respectively) | Cleverley and Associates |
| Potential incremental net revenue opportunity per prevented infection, i.e., economic opportunity cost per infection (\$)                                       | 19,617 | $E = C \times D$ |                                                                                  |                          |

**Table B. Results of probabilistic analysis**

|                    |        |
|--------------------|--------|
| Mean               | 19,951 |
| Standard Deviation | 5,978  |

Abbreviations: CDC=Centers for Disease Control and Prevention, NHDS=National Hospital Discharge Survey

## Approach for estimating an average per patient cost of the quality improvement programme

Given that the Keystone ICU project is implemented at the ICU level—and its costs have been estimated at the intensive care unit level—but the decision tree model is implemented at a patient level, a per patient cost of the programme must be determined. Ultimately, this depends on the cost of the programme to a hospital and the number of intensive care unit patients receiving central venous catheters in that hospital (patients who represent the population that stands to benefit from the bloodstream infection prevention effort). It can be argued that all intensive care unit patients in a hospital stand to benefit (regardless of whether they receive a central venous catheter or not) because of the culture change components of the programme, but the approach used here is more conservative.

We estimated a per patient cost of the programme by first deriving a national annual cohort of intensive care unit patients exposed to central venous catheters. To do this, we multiplied 4.85 million estimated annual intensive care unit admissions in the US by an estimate of the proportion of patients admitted to an intensive care unit who receive a central venous catheter,[3] yielding 1.8 million patients who had catheters. We then divided the estimate of 1.8 million patients by the number of hospitals that reported having adult intensive care units in the American Hospital Association Annual Survey of Hospitals.[4] This provided an average number of “exposed” patients per hospital (Table 3). Finally, we divided total costs of the programme per hospital by the number of patients per hospital to yield an average cost for the programme per patient.

**Table C. Calculation of the average number of ICU patients with CVCs**

|                                                                       | <b>Base case</b> | <b>Low value<sup>†</sup></b> | <b>High value<sup>†</sup></b> |
|-----------------------------------------------------------------------|------------------|------------------------------|-------------------------------|
| Number of annual ICU admissions in US                                 | 4,850,000*       | 4,000,000                    | 5,700,000                     |
| <b>X</b> % of ICU admissions receiving CVCs                           | 38%              | 17%                          | 48%                           |
| <b>= Number of ICU patients receiving CVCs</b>                        | <b>1,843,000</b> |                              |                               |
| Number of US hospitals with adult ICUs                                | 4,355            |                              |                               |
| <b>Average number of ICU patients with CVCs per hospital per year</b> | <b>423</b>       |                              |                               |

\*Midpoint between the lowest and highest values identified in the literature

<sup>†</sup>The low value and the high value were used in the probabilistic model to capture the uncertainty in the calculation.

Abbreviation: ICU—intensive care unit, CVC—central venous catheter

Based on this calculation there is an average of 423 intensive care unit patients with central venous catheters per hospital per year in the United States (the average does not distinguish between small hospitals or large hospitals). Multiplying this by 5 to reflect the 5-year period used in this cost effectiveness analysis yields 2,115 patients. Diving this by the discounted cost of the quality improvement programme for a single hospital over 5 years (\$990,340) results in a per patient cost of the programme of \$468. For the main analysis presented in the paper, we implemented these calculations using Monte Carlo simulation to capture the uncertainty in the

1  
2  
3 base case parameter values. Doing so results in different estimates than the basic arithmetic used  
4 here. As such, we calculated that the mean per patient cost of the programme was \$540 with a  
5 standard deviation of \$120 and we applied a distribution that was lognormal based on normal  
6 mean.  
7

8  
9 This approach has several limitations. First, deriving a patient cost estimate of the programme  
0 was limited by a lack of appropriate individual-based national data on central line utilisation  
1 among intensive care unit patients. We consulted experts to inquire about less apparent sources  
2 of data to aid in the estimation of this parameter but consensus emerged that we would need to  
3 make several assumptions to derive this estimate. These assumptions were based on published  
4 data in the critical care literature and reputable national surveys.[4 5] To address the uncertainty  
5 in our estimate we tested a large standard deviation for the parameter in the probabilistic  
6 sensitivity analysis. The estimate is intended to reflect an average. It is likely that hospitals with  
7 more intensive care unit beds benefit from economies of scale when implementing the  
8 programme, providing a lower programme cost per patient.  
9  
20  
21  
22  
23  
24  
25  
26  
27  
28  
29  
0  
3  
2  
3  
3  
5  
6  
3  
8  
9  
40  
41  
42  
43  
44  
45  
46  
47  
48  
49  
50  
51  
52  
53  
54  
55  
56  
57  
58  
59  
6

1  
2  
3  
4  
5  
6  
7  
8  
9  
0  
1  
2  
3  
4  
5  
6  
7  
8  
9  
20  
21  
22  
23  
24  
25  
26  
27  
28  
29  
0  
3  
2  
3  
3  
5  
6  
3  
8  
9  
40  
41  
42  
43  
44  
45  
46  
47  
48  
49

**Table D. Full numerical results from all analyses**

| Model                                          | Incremental cost effectiveness ratio |         |                  |                   |                |                |
|------------------------------------------------|--------------------------------------|---------|------------------|-------------------|----------------|----------------|
|                                                | Mean                                 | Median  | 2.5th Percentile | 97.5th Percentile | Prob. Negative | Prob. Positive |
| <b>Main Analyses</b>                           |                                      |         |                  |                   |                |                |
| Bloodstream infections prevented               | -4,401                               | -5,204  | -20,169          | 10,758            | 0.79           | 0.21           |
| Deaths prevented                               | -36,724                              | -34,149 | -215,592         | 90,695            | 0.79           | 0.21           |
| <b>Sensitivity Analyses</b>                    |                                      |         |                  |                   |                |                |
| Bloodstream infections discounted              | -3,866                               | -5,442  | -20,912          | 10,921            | 0.79           | 0.21           |
| Deaths discounted                              | -38,191                              | -36,784 | -220,378         | 92,979            | 0.79           | 0.21           |
| 0% discounting of costs, infections prevented  | -5,019                               | -5,578  | -21,467          | 10,923            | 0.79           | 0.21           |
| 0% discounting of costs, deaths prevented      | -40,289                              | -36,855 | -216,212         | 93,041            | 0.79           | 0.21           |
| 5% discounting of costs, infections prevented* | -4,503                               | -4,821  | -19,512          | 10,268            | 0.78           | 0.22           |
| 5% discounting of costs, deaths prevented*     | -32,925                              | -32,605 | -196,368         | 80,484            | 0.79           | 0.21           |

\*The average of the 5-year stream of discounted costs was used.

## References

1. Graves N, Halton K, Lairson D. Economics and preventing hospital-acquired infection: broadening the perspective. *Infect Control Hosp Epidemiol* 2007;28(2):178-84. doi: 10.1086/510787.
2. Zimlichman E, Henderson D, Tamir O, *et al.* Health care-associated infections: a meta-analysis of costs and financial impact on the US health care system. *JAMA Intern Med* 2013;173(22):2039-46. doi: 10.1001/jamainternmed.2013.9763.
3. Warren DK, Quadir WW, Hollenbeak CS, *et al.* Attributable cost of catheter-associated bloodstream infections among intensive care patients in a nonteaching hospital. *Crit Care Med* 2006;34(8):2084-9. doi: 10.1097/01.CCM.0000227648.15804.2D.
4. American Hospital Association. *AHA Hospital Statistics. 2013 ed*: American Hospital Association, 2012.
5. Wunsch H, Angus DC, Harrison DA, *et al.* Comparison of medical admissions to intensive care units in the United States and United Kingdom. *Am J Respir Crit Care Med* 2011;183(12):1666-73. doi: 10.1164/rccm.201012-1961OC.

## Web only figures

Figure S3 | Cost effectiveness plane for deaths averted due to bloodstream infections prevented

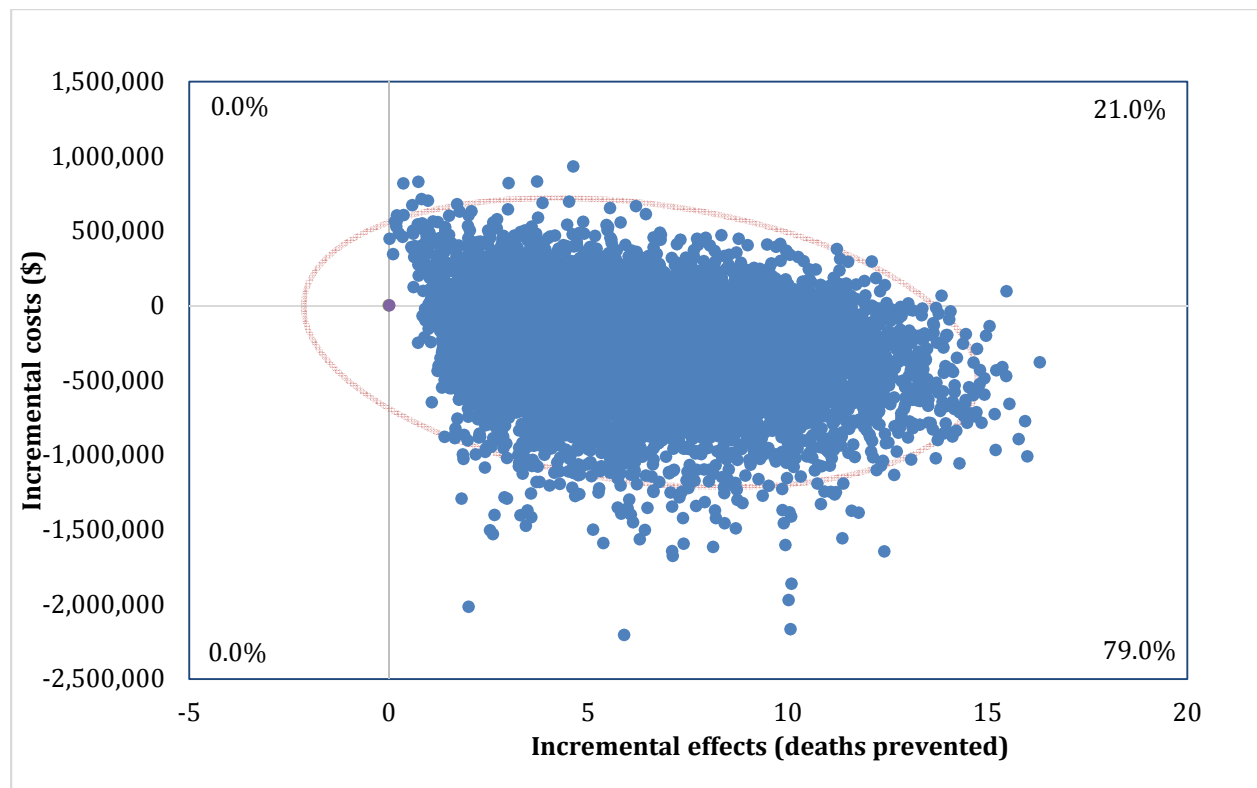

Cost effectiveness plane for deaths averted due to bloodstream infections prevented with 95% confidence ellipses. Values on both axes have been multiplied by 1,000 to yield incremental costs and effects expressed per 1,000 patients to aid interpretation. Incremental refers to the difference in costs or effects between programme and non-programme intensive care units. Cost values in US dollars. Boxes in the plot region display the percentage of the distribution of incremental cost effectiveness ratios falling in each quadrant.

Figure S4 | Tornado diagram for bloodstream infections prevented

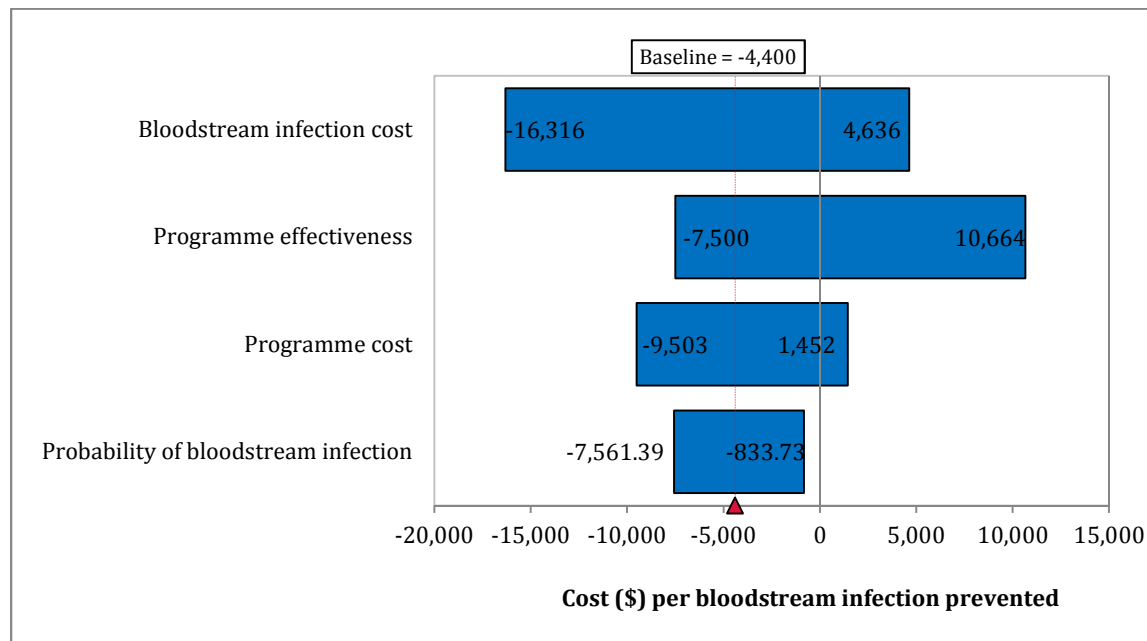

Tornado diagram of model inputs ranked by effect on the mean cost per bloodstream infection prevented. Each parameter was simultaneously sampled 10,000 times from an underlying distribution that reflects uncertainty in the parameter estimate. Cost values are in US dollars.

Figure S5 | Tornado diagram for deaths averted due to bloodstream infections prevented

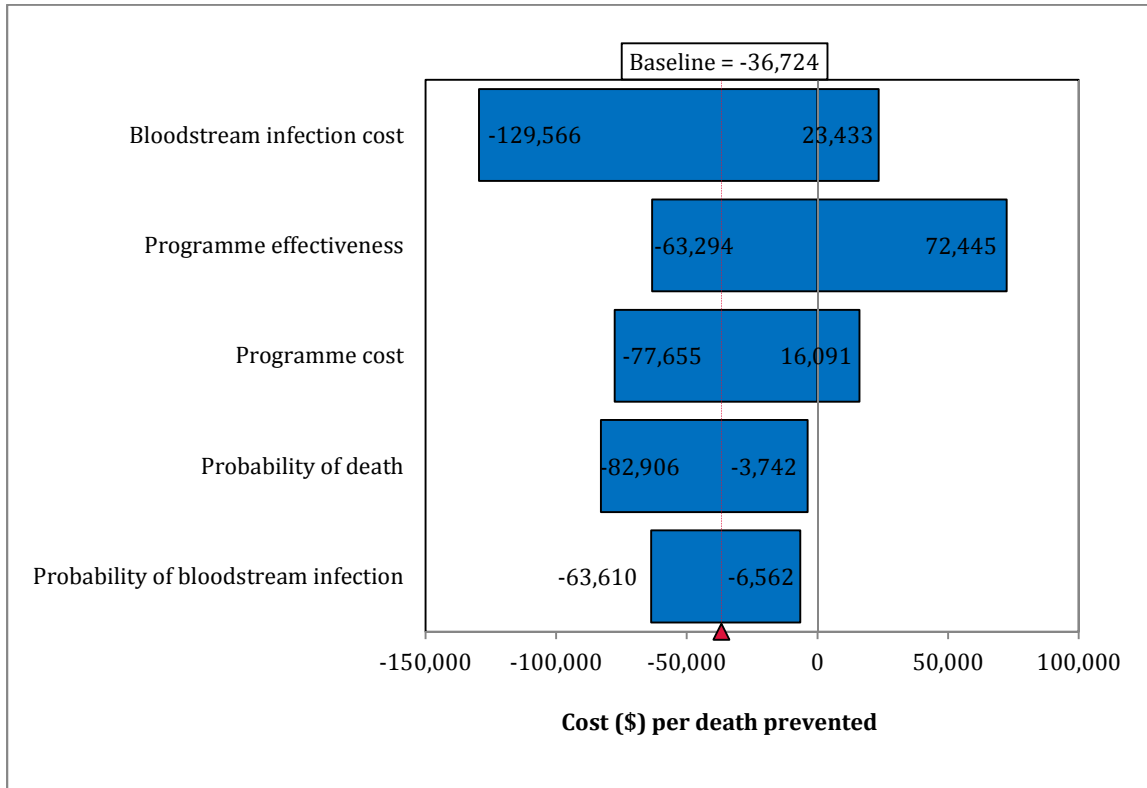

Tornado diagram of model inputs ranked by effect on the mean cost per death prevented. Each parameter was simultaneously sampled 10,000 times from an underlying distribution that reflects uncertainty in the parameter estimate. Cost values are in US dollars.



Table

Table 1 | CHEERS checklist—Items to include when reporting economic evaluations of health interventions Nos. refer to pages

| Section/item                                           | Item No | Recommendation                                                                                                                                                                                                                                                                                                                                        | Reported on page No/line No |
|--------------------------------------------------------|---------|-------------------------------------------------------------------------------------------------------------------------------------------------------------------------------------------------------------------------------------------------------------------------------------------------------------------------------------------------------|-----------------------------|
| <b>Title and abstract</b>                              |         |                                                                                                                                                                                                                                                                                                                                                       |                             |
| Title                                                  | 1       | Identify the study as an economic evaluation or use more specific terms such as “cost-effectiveness analysis”, and describe the interventions compared.                                                                                                                                                                                               | 1                           |
| Abstract                                               | 2       | Provide a structured summary of objectives, perspective, setting, methods (including study design and inputs), results (including base case and uncertainty analyses), and conclusions.                                                                                                                                                               | 3                           |
| <b>Introduction</b>                                    |         |                                                                                                                                                                                                                                                                                                                                                       |                             |
| Background and objectives                              | 3       | Provide an explicit statement of the broader context for the study.                                                                                                                                                                                                                                                                                   | 5–6                         |
|                                                        |         | Present the study question and its relevance for health policy or practice decisions.                                                                                                                                                                                                                                                                 | 5–6                         |
| <b>Methods</b>                                         |         |                                                                                                                                                                                                                                                                                                                                                       |                             |
| Target population and subgroups                        | 4       | Describe characteristics of the base case population and subgroups analysed, including why they were chosen.                                                                                                                                                                                                                                          | 7                           |
| Setting and location                                   | 5       | State relevant aspects of the system(s) in which the decision(s) need(s) to be made.                                                                                                                                                                                                                                                                  | 7                           |
| Study perspective                                      | 6       | Describe the perspective of the study and relate this to the costs being evaluated.                                                                                                                                                                                                                                                                   | 7                           |
| Comparators                                            | 7       | Describe the interventions or strategies being compared and state why they were chosen.                                                                                                                                                                                                                                                               | 6                           |
| Time horizon                                           | 8       | State the time horizon(s) over which costs and consequences are being evaluated and say why appropriate.                                                                                                                                                                                                                                              | 7                           |
| Discount rate                                          | 9       | Report the choice of discount rate(s) used for costs and outcomes and say why appropriate.                                                                                                                                                                                                                                                            | 11, 12                      |
| Choice of health outcomes                              | 10      | Describe what outcomes were used as the measure(s) of benefit in the evaluation and their relevance for the type of analysis performed.                                                                                                                                                                                                               | 12                          |
| Measurement of effectiveness                           | 11a     | <i>Single study-based estimates:</i> Describe fully the design features of the single effectiveness study and why the single study was a sufficient source of clinical effectiveness data.                                                                                                                                                            | 11                          |
|                                                        | 11b     | <i>Synthesis-based estimates:</i> Describe fully the methods used for identification of included studies and synthesis of clinical effectiveness data.                                                                                                                                                                                                |                             |
| Measurement and valuation of preference based outcomes | 12      | If applicable, describe the population and methods used to elicit preferences for outcomes.                                                                                                                                                                                                                                                           | NA                          |
| Estimating resources and costs                         | 13a     | <i>Single study-based economic evaluation:</i> Describe approaches used to estimate resource use associated with the alternative interventions. Describe primary or secondary research methods for valuing each resource item in terms of its unit cost. Describe any adjustments made to approximate to opportunity costs.                           |                             |
|                                                        | 13b     | <i>Model-based economic evaluation:</i> Describe approaches and data sources used to estimate resource use associated with model health states. Describe primary or secondary research methods for valuing each resource item in terms of its unit cost. Describe any adjustments made to approximate to opportunity costs.                           | 8–11                        |
| Currency, price date, and conversion                   | 14      | Report the dates of the estimated resource quantities and unit costs. Describe methods for adjusting estimated unit costs to the year of reported costs if necessary. Describe methods for converting costs into a common currency base and the exchange rate.                                                                                        | 11                          |
| Choice of model                                        | 15      | Describe and give reasons for the specific type of decision-analytical model used. Providing a figure to show model structure is strongly recommended.                                                                                                                                                                                                | 6; Fig                      |
| Assumptions                                            | 16      | Describe all structural or other assumptions underpinning the decision-analytical model.                                                                                                                                                                                                                                                              | 6                           |
| Analytical methods                                     | 17      | Describe all analytical methods supporting the evaluation. This could include methods for dealing with skewed, missing, or censored data; extrapolation methods; methods for pooling data; approaches to validate or make adjustments (such as half cycle corrections) to a model; and methods for handling population heterogeneity and uncertainty. | 12                          |
| <b>Results</b>                                         |         |                                                                                                                                                                                                                                                                                                                                                       |                             |
| Study parameters                                       | 18      | Report the values, ranges, references, and, if used, probability distributions for all parameters. Report reasons or sources for distributions used to represent uncertainty where appropriate. Providing a table to show the input values is strongly recommended.                                                                                   | 8                           |
| Incremental costs and outcomes                         | 19      | For each intervention, report mean values for the main categories of estimated costs and outcomes of interest, as well as mean differences between the comparator groups. If applicable, report incremental cost-effectiveness ratios.                                                                                                                | 13–15                       |
| Characterising uncertainty                             | 20a     | <i>Single study-based economic evaluation:</i> Describe the effects of sampling uncertainty for the estimated incremental cost and incremental effectiveness parameters, together with the impact of methodological assumptions (such as discount rate, study perspective).                                                                           |                             |

(continued)

| Section/Item                                                                                                     | Item No | Recommendation                                                                                                                                                                                                                                                             | Reported on page No/line No |
|------------------------------------------------------------------------------------------------------------------|---------|----------------------------------------------------------------------------------------------------------------------------------------------------------------------------------------------------------------------------------------------------------------------------|-----------------------------|
|                                                                                                                  | 20b     | <i>Model-based economic evaluation</i> : Describe the effects on the results of uncertainty for all input parameters, and uncertainty related to the structure of the model and assumptions.                                                                               | 13–15                       |
| Characterising heterogeneity                                                                                     | 21      | If applicable, report differences in costs, outcomes, or cost-effectiveness that can be explained by variations between subgroups of patients with different baseline characteristics or other observed variability in effects that are not reducible by more information. | NA                          |
| <b>Discussion</b>                                                                                                |         |                                                                                                                                                                                                                                                                            |                             |
| Study findings, limitations, generalisability, and current knowledge                                             | 22      | Summarise key study findings and describe how they support the conclusions reached. Discuss limitations and the generalisability of the findings and how the findings fit with current knowledge.                                                                          | 15–19                       |
| <b>Other</b>                                                                                                     |         |                                                                                                                                                                                                                                                                            |                             |
| Source of funding                                                                                                | 23      | Describe how the study was funded and the role of the funder in the identification, design, conduct, and reporting of the analysis. Describe other non-monetary sources of support.                                                                                        | 20                          |
| Conflicts of interest                                                                                            | 24      | Describe any potential for conflict of interest of study contributors in accordance with journal policy. In the absence of a journal policy, we recommend authors comply with International Committee of Medical Journal Editors recommendations.                          | 21                          |
| For consistency, the CHEERS statement checklist format is based on the format of the CONSORT statement checklist |         |                                                                                                                                                                                                                                                                            |                             |

# BMJ Open

## Cost effectiveness of a quality improvement programme to reduce central line-associated bloodstream infections in intensive care units in the United States

|                                 |                                                                                                                                                                                                                                                                                                                                                                                                                                                                                                                                                       |
|---------------------------------|-------------------------------------------------------------------------------------------------------------------------------------------------------------------------------------------------------------------------------------------------------------------------------------------------------------------------------------------------------------------------------------------------------------------------------------------------------------------------------------------------------------------------------------------------------|
| Journal:                        | <i>BMJ Open</i>                                                                                                                                                                                                                                                                                                                                                                                                                                                                                                                                       |
| Manuscript ID:                  | bmjopen-2014-006065.R1                                                                                                                                                                                                                                                                                                                                                                                                                                                                                                                                |
| Article Type:                   | Research                                                                                                                                                                                                                                                                                                                                                                                                                                                                                                                                              |
| Date Submitted by the Author:   | 15-Aug-2014                                                                                                                                                                                                                                                                                                                                                                                                                                                                                                                                           |
| Complete List of Authors:       | Herzer, Kurt; Johns Hopkins School of Medicine, Medical Scientist Training Program<br>Niessen, Louis; University of Warwick, Liverpool School of Tropical Medicine, Centre for Applied Health Research and Delivery (CAHRD)<br>Constenla, Dagna; Johns Hopkins Bloomberg School of Public Health, International Vaccine Access Center<br>Ward, William; Johns Hopkins Bloomberg School of Public Health, Health Policy and Management<br>Pronovost, Peter; The Johns Hopkins University School of Medicine, Anesthesiology and Critical Care Medicine |
| <b>Primary Subject Heading</b>: | Intensive care                                                                                                                                                                                                                                                                                                                                                                                                                                                                                                                                        |
| Secondary Subject Heading:      | Health economics, Health services research, Health policy, Intensive care, Infectious diseases                                                                                                                                                                                                                                                                                                                                                                                                                                                        |
| Keywords:                       | Health economics < HEALTH SERVICES ADMINISTRATION & MANAGEMENT, Health policy < HEALTH SERVICES ADMINISTRATION & MANAGEMENT, Health & safety < HEALTH SERVICES ADMINISTRATION & MANAGEMENT, Quality in health care < HEALTH SERVICES ADMINISTRATION & MANAGEMENT, Infection control < INFECTIOUS DISEASES, Adult intensive & critical care < INTENSIVE & CRITICAL CARE                                                                                                                                                                                |

SCHOLARONE™  
Manuscripts

1  
2  
3 **Cost effectiveness of a quality improvement programme to reduce central line-associated**  
4  
5 **bloodstream infections in intensive care units in the United States**  
6  
7  
8

9  
0 Kurt R Herzer, Louis Niessen, Dagna O Constenla, William J Ward Jr, Peter J Pronovost  
1

2  
3  
4  
5 Medical Scientist Training Program, Johns Hopkins School of Medicine, 1830 East Monument  
6  
7 Street, Baltimore, MD 21205, USA  
8

9  
10 Kurt R Herzer  
11

12  
13 *MD-PhD student*  
14  
15  
16

17 Centre for Applied Health Research and Delivery (CAHRD), Liverpool School of Tropical  
18  
19 Medicine, University of Warwick, Coventry, CV4 7AL, United Kingdom  
20

21  
22 Louis Niessen  
23

24  
25 *Professor*  
26  
27  
28

29 International Vaccine Access Center, Johns Hopkins Bloomberg School of Public Health, 855  
30  
31 North Wolfe Street, Baltimore, MD 21205, USA  
32  
33

34  
35 Dagna O Constenla  
36

37  
38 *Associate Scientist*  
39  
40  
41

42 Department of Health Policy and Management, Johns Hopkins Bloomberg School of Public  
43  
44 Health, 624 North Broadway Street, Baltimore, MD 21205, USA  
45  
46

47  
48 William J Ward Jr  
49  
50  
51  
52  
53  
54  
55  
56  
57  
58  
59  
60

1  
2  
3 *Associate Professor*  
4  
5  
6  
7

8 Armstrong Institute for Patient Safety and Quality, Johns Hopkins Medicine, 750 East Pratt  
9 Street, Baltimore, MD 21202, USA  
0  
1

2 Peter J Pronovost  
3

4 *Professor*  
5  
6  
7

8  
9  
10 Correspondence to: Kurt Herzer, 1830 East Monument Street, Baltimore, MD 21205, USA;  
11  
12 [kherzer@jhmi.edu](mailto:kherzer@jhmi.edu); 443-900-2415  
13  
14

15  
16  
17 Keywords: quality improvement, cost effectiveness, nosocomial infections, health policy,  
18  
19 checklists  
20  
21

22  
23  
24  
25  
26  
27  
28  
29  
30  
31  
32  
33  
34  
35  
36  
37  
38  
39  
40  
41  
42  
43  
44  
45  
46  
47  
48  
49  
50  
51  
52  
53  
54  
55  
56  
57  
58  
59  
60  
Word Count: 3,424

## Abstract

**Objective:** To assess the cost effectiveness of a multifaceted quality improvement programme focused on reducing central line-associated bloodstream infections in intensive care units.

**Design:** Cost effectiveness analysis using a decision tree model to compare programme to non-programme intensive care units.

**Setting:** United States (US).

**Population:** Adult patients in the intensive care unit.

**Costs:** Economic costs of the programme and of central line-associated bloodstream infections were estimated from the perspective of the hospital and presented in 2013 US dollars.

**Main outcome measures:** Central line-associated bloodstream infections prevented, deaths averted due to central line-associated bloodstream infections prevented, and incremental cost effectiveness ratios. Probabilistic sensitivity analysis was performed.

**Results:** Compared to current practice, the programme is strongly dominant and reduces bloodstream infections and deaths at no additional cost. The probabilistic sensitivity analysis showed that there was an almost 80% probability that the programme reduces bloodstream infections and the infections' economic costs to hospitals. The opportunity cost of a bloodstream infection to a hospital was the most important model parameter in these analyses.

**Conclusions:** This multifaceted quality improvement programme, as it is currently implemented by hospitals on an increasingly large scale in the US, likely reduces the economic costs of central line-associated bloodstream infections for US hospitals. Awareness among hospitals about the programme's benefits should enhance implementation. The programme's implementation has the potential to substantially reduce morbidity, mortality, and economic costs associated with central line-associated bloodstream infections.

## Article summary

### Strengths and limitations of this study

- This study was conducted according to best practices in cost effectiveness analysis and demonstrates that a multifaceted quality improvement programme can reduce the economic costs of central line-associated bloodstream infections for hospitals.
- We used nationally representative data sources to increase generalisability and performed a probabilistic sensitivity analysis to quantify the uncertainty in our cost effectiveness estimates.
- Due to data limitations we were unable to assess the impact of patient heterogeneity, such as demographics and clinical characteristics, on baseline risk, treatment effect, or resource utilisation. We did not evaluate costs outside the acute hospital setting, such as rehabilitation costs or productivity losses for delays returning to work.

## INTRODUCTION

Central line-associated bloodstream infections (CLABSI) are common, expensive to payers and patients, and potentially fatal.[1 2] Each year, nearly 80,000 Americans develop CLABSIs in the intensive care unit (ICU), and more than 25,000 of these patients die.[3] A single infection can cost payers as much as \$56,000, culminating in over \$2 billion in related costs per year in the United States.[4] CLABSIs in ICU patients have an estimated attributable mortality rate of 14 to 40%, with a prolonged length of stay of 7.5 to 25 days.[5 6]

The Keystone ICU project, first launched in Michigan in 2004 and since scaled across the United States, Spain, Peru, Pakistan, and the United Kingdom, has captured the interest and attention of patients, payers, and policymakers for its substantial, sustained, and scalable reductions in preventable nosocomial infections. Over 1,200 US hospitals are currently participating in this multifaceted quality improvement programme through *On the CUSP: Stop BSI*, a national collaborative, and many others are likely using checklists and infection prevention programmes in their ICUs as standard practice. The programme has been evaluated through prospective cohort studies,[7-10] retrospective observational studies using claims data,[11] and both cluster nonrandomised[12] and randomised controlled trials.[13] When viewed collectively, this evidence suggests that the programme is associated with substantial reductions in both CLABSIs and mortality in ICU patients.

In spite of commendable investment in this programme to manage the undesirable consequences of CLABSIs, an important question remains unanswered: compared with current practice, is this programme cost effective for US hospitals? Reporting of economic data in quality improvement studies is uncommon, and there are few formal cost effectiveness analyses of quality improvement programmes.[14-16] Similarly, because the estimated gross costs of



1  
2  
3 CLABSIs to the healthcare system are very high, the conclusion that expanding infection control  
4 efforts will be cost saving (relative to the costs incurred by expanded efforts) is accepted without  
5 rigorous analysis.[17] This paper examines the cost changes and effectiveness of the Keystone  
6 ICU project from the perspective of the hospital using nationally representative data sources  
7 from the United States.  
8  
9

## 10 11 12 13 14 15 16 17 18 19 20 21 22 23 24 25 26 27 28 29 30 31 32 33 34 35 36 37 38 39 40 41 42 43 44 45 46 47 48 49 50 51 52 53 54 55 56 57 58 59 60

**METHODS**

### Overview of the analysis

We developed a decision tree model to address the choice faced at an individual hospital about implementing the programme (Figure 1). The use of a decision tree approach is justified by the short-term progression of CLABSIs. The model assumes that patients do not experience other adverse effects of catheterisation, such as catheter colonisation leading to local infection, hypersensitivity reactions, or mechanical complications such as pneumothorax. The Keystone ICU project instead focused on infectious complications, because they are more common, more costly, and often fatal.[18] Consistent with other economic evaluations of CLABSIs in the ICU setting, we assumed that the consequences of infection are independent of age, patient disease severity, and the causative organism.[18 19] These assumptions are congruent with the programme itself, which does not discriminate between subgroups of patients based on these factors.

The comparator was current practice as the most realistic alternative faced by organisations seeking to implement the programme. Current practice encompasses on-going or existing activities that might influence the risk of infection amongst patients, such as the use of anti-infective central venous catheters.

1  
2  
3 The target population consisted of adult (18 years or older) ICU patients in accordance  
4 with studies of the Keystone ICU project and its subsequent replications.[13] Because costs and  
5 benefits only accrue while the programme is implemented, the time frame and analytic horizon  
6 are fundamentally the same. We used a time horizon of five years. This analysis was performed  
7 from the hospital's perspective. Our study aims to address the following question: is  
8 implementation of this quality improvement programme to decrease CLABSIs in the ICU a cost-  
9 effective approach when compared with current practice in US hospitals?  
10  
11  
12  
13  
14  
15  
16  
17  
18  
19  
20  
21  
22

### 23 **Quality improvement programme**

24 Details of the programme and its conceptual approach have been described  
25 elsewhere.[20-22] In brief, this multifaceted programme employed clinician communication  
26 tools, teamwork, and safety culture assessment and improvement tools (known as the  
27 Comprehensive Unit-based Safety Program [CUSP]), and a five-item, evidence-based checklist  
28 for correctly inserting central venous catheters. The five components of the checklist included  
29 using basic hand hygiene, exercising full barrier precautions, cleaning the skin with  
30 chlorhexidine, avoiding the femoral site when possible, and removing any unnecessary catheters.  
31 A model for translating evidence into practice identified and mitigated local barriers to  
32 implementation of the checklist.[22] Quarterly infection rates measured at the ICU level were  
33 used to monitor progress toward the goal of reducing CLABSIs.  
34  
35  
36  
37  
38  
39  
40  
41  
42  
43  
44  
45  
46  
47  
48  
49  
50

### 51 **Model inputs**

52  
53  
54  
55  
56  
57  
58  
59  
60

Table 1 shows the key parameters used in the decision tree model, such as probabilities and cost inputs as well as the effectiveness of the programme, which are described in detail in the following sections.

**Table 1 | Parameters used in the decision tree model**

| Parameter                                                   | Distribution                                     | Source |
|-------------------------------------------------------------|--------------------------------------------------|--------|
| Probability of CLABSI*                                      | Beta: 0.052 (SD 0.0074)                          | 18,25  |
| Death attributable to CLABSI                                | Beta: 0.15 (SD 0.056)                            | 6      |
| Incidence rate ratio of programme versus non-programme ICUs | Lognormal based on normal mean 0.19 (SD 0.13)    | 13     |
| <b>Total cost (\$):</b>                                     |                                                  |        |
| CLABSI (per patient)†                                       | Lognormal based on normal mean 18,793 (SD 5,533) | 33     |
| Programme (per patient)†                                    | Lognormal based on normal mean 540 (SD 120)      | 29     |

CLABSI = central-line associated bloodstream infection, ICU = intensive care unit

\*Conditional probability of a CLABSI given exposure to a central venous catheter, assumes standard (non-antimicrobial) catheter.

†Discounted costs presented

### Risk of CLABSI and death

Estimates of the risk of CLABSI given exposure to a central venous catheter varied from 3.0% to as much as 16.0%. [23 24] We used a probability estimate of 5.2% for a standard catheter, derived from a meta analysis of 13 randomised controlled trials from a previous economic evaluation. [18 25] Estimates of the attributable mortality of CLABSI ranged from 14 to 40%. [5 6 26 27] We used a point estimate of 15%.

### Costs

Estimates of payer costs attributable to CLABSI varied widely, from as little as \$6,000 to over \$56,000. [4 6 18 28] The reasons for this variation can be attributed to the small sample

1  
2  
3 sizes of studies, challenges allocating inpatient costs, perspectives used, the types of cost  
4  
5 categories included, and the methodology used for estimation.[29] Existing studies have largely  
6  
7 focused on financial costs (or hospital charges or payer costs) rather than opportunity costs and  
8  
9 so they may incorrectly estimate the economic cost of CLABSIs to hospitals. We considered the  
0  
1 economic cost of CLABSIs in terms of the increased length of stay and variable costs associated  
2  
3 with that occurrence.[30] Given that a significant amount of hospital costs are fixed in the short  
4  
5 run, the economic viability of quality improvement programmes that reduce CLABSIs rests on  
6  
7 two things: deploying the bed-days freed by shorter lengths of stay for new admissions and  
8  
9 reducing utilization of medications and supplies. The value of the new admissions, (the potential  
0  
1 incremental net revenue opportunity per prevented infection) represents the economic cost of  
2  
3 infection and accordingly, the potential economic cost avoidance resulting from infection  
4  
5 prevention.[31] Using this approach, we estimated that the discounted cost of a CLABSI was  
6  
7 \$18,793 (see appendix Tables A and B for details of this calculation).

8  
9 Start-up costs and recurring costs associated with the quality improvement programme  
0  
1 were assigned using an activity-based micro-costing of the programme performed in six hospitals  
2  
3 in Michigan.[29] We assumed that start-up costs occurred in the first year of implementation and  
4  
5 did not discount them. Capital items, such as bloodstream infection line carts, were annualised  
6  
7 assuming a five-year useful life and 3% discount rate. We included the opportunity costs of key  
8  
9 personnel whose time was committed to the programme even though a hospital may not incur  
0  
1 any financial costs related to personnel who are already on staff. We estimated this cost by  
2  
3 multiplying each staff person's percentage effort committed to the programme by an estimate of  
4  
5 that position's annual compensation. We used the Society of Critical Care Medicine's annual  
6  
7 compensation estimates from 2009 for critical care physicians, nurses, pharmacists, and  
8  
9

respiratory therapists.[32] The salary for infection control preventionists was based on the Bureau of Labor Statistics's 2011 Occupational Employment Statistics and we added 30% benefits. Table 2 presents a detailed itemisation of the start-up costs and recurring costs of the programme. Start-up costs were approximately \$80,000 and recurring costs were approximately \$192,000 per hospital per year. Personnel costs were the largest contributor, comprising 95% of start-up costs and 89% of recurring costs.

**Table 2 | Itemisation of programme costs (per hospital)**

| Cost category                                                         | Start-up costs | Recurring costs* |
|-----------------------------------------------------------------------|----------------|------------------|
| Personnel (\$)                                                        |                |                  |
| Critical care physicians (2 on average per hospital)                  | 26,004         | 71,953           |
| Nurses (8 on average per hospital)                                    | 44,406         | 75,306           |
| Respiratory therapists                                                | 4,605          | 7,923            |
| Infection control preventionists                                      | 1,981          | 7,855            |
| Pharmacists                                                           | 2,725          | 7,962            |
| Education and Training (\$)                                           |                |                  |
| Education and training expenses                                       | 3,579          |                  |
| Capital Items (\$)                                                    |                |                  |
| CLABSI line cart/central line insertion cart (annual equivalent cost) | 426            | 426              |
| Materials (\$)                                                        |                |                  |
| Chlorohexidine                                                        |                | 2,378            |
| Oral care kits                                                        |                | 6,933            |
| Sterile central line dressing kits                                    |                | 11,555           |
| <b>Total (\$)</b>                                                     | <b>83,725</b>  | <b>192,292</b>   |

CLABSI = central line-associated bloodstream infection

\*Recurring costs occur each year that the intervention is in place; as such, this total represents the annual recurring cost (not discounted as presented here).

We estimated a per patient cost of the programme by deriving an average number of ICU patients per hospital who had central venous catheters (the patients most likely to benefit from the programme's prevention efforts). To calculate this, we first derived a national annual cohort of ICU patients exposed to central venous catheters by multiplying the total annual ICU

1  
2  
3 admissions in the US by an estimate of the proportion of patients admitted to an ICU that receive  
4 central venous catheters.[33] We then divided this group of ICU admissions with central venous  
5 catheters by the number of hospitals that reported having adult ICUs in the American Hospital  
6 Association Annual Survey of Hospitals,[34] yielding an average number of “exposed” patients  
7 per hospital. Finally, we divided the total costs of the programme per hospital by the number of  
8 patients per hospital to yield an average cost for the programme per patient of \$540 (standard  
9 deviation, 120). Appendix Table C contains additional details of this calculation, including the  
10 uncertainty ranges incorporated into the estimate.  
11  
12

13 All costs were adjusted to 2013 US dollars using the Consumer Price Index for medical  
14 care services. Recurring costs were discounted by 3% annually. In separate sensitivity analyses,  
15 we examined the effect of not discounting costs and of discounting costs by 5%.  
16  
17  
18  
19

## 20 Effectiveness

21 We based our estimate of the programme’s effectiveness on a cluster randomised  
22 controlled trial that found an 81% reduction in CLABSI rates comparing programme ICUs to  
23 control ICUs (incidence rate ratio, 0.19; 95% confidence interval, 0.06–0.57).[13] We used the  
24 confidence interval of this point estimate, a measure of uncertainty in the programme’s  
25 effectiveness, to derive a standard deviation of the estimate for probabilistic sensitivity analysis.  
26 This effectiveness parameter was measured at the ICU level but in our model we assumed that it  
27 applied to individual patients. This ecological assumption was necessary because there are no  
28 patient level effectiveness estimates available from the Keystone ICU project. The standard  
29 deviation of the estimate captures the heterogenic reality that the intervention benefit is not  
30 uniform among ICU patients.  
31  
32  
33  
34  
35  
36  
37  
38  
39  
40  
41  
42  
43  
44  
45  
46  
47  
48  
49  
50  
51  
52  
53  
54  
55  
56  
57  
58  
59  
60



model's input parameters. We used Monte Carlo simulation to perform 10,000 iterations of the model, simultaneously sampling each parameter from an underlying distribution that reflects the degree of uncertainty in the parameter estimate. Uncertainty in parameter estimates was obtained from the confidence intervals or standard deviations published with the point estimates. Table 1 presents the modelled distributions, point estimates, and standard deviations for the key model parameters. All analyses were performed using Microsoft Excel (Microsoft Corporation; Redmond, WA) with @Risk (Palisade Corporation; Ithaca, NY).

## RESULTS

Table 3 compares programme and non-programme ICU costs and outcomes for CLABSIs prevented and deaths averted. The quality improvement programme prevents 42 CLABSIs per 1,000 patients and averts 6 deaths per 1,000 patients at no additional cost in the base case analysis, representing a dominant strategy when compared with current practice.

**Table 3 | Comparison of costs and outcomes between programme and non-programme intensive care units (ICUs)**

|                                              | Mean     | Median   | 2.5 <sup>th</sup> – 97.5 <sup>th</sup> Percentile |
|----------------------------------------------|----------|----------|---------------------------------------------------|
| Non-programme ICU                            |          |          |                                                   |
| CLABSIs                                      | 52       | 52       | 39 – 66                                           |
| Deaths                                       | 8        | 8        | 2 – 14                                            |
| Costs (S)*                                   | 987,000  | 937,000  | 488,000 – 1,760,000                               |
| Programme ICU                                |          |          |                                                   |
| CLABSIs                                      | 10       | 9        | 3 – 29                                            |
| Deaths                                       | 2        | 1        | 0 – 5                                             |
| Costs (\$)*                                  | 738,000  | 710,000  | 453,000 – 1,190,000                               |
| Benefit of programme <sup>†</sup>            |          |          |                                                   |
| CLABSIs prevented                            | 42       | 42       | 23 – 58                                           |
| Deaths averted                               | 6        | 6        | 2 – 12                                            |
| Net costs (\$)                               | -249,000 | -221,000 | -976,000 – 300,000                                |
| Incremental cost effectiveness ratio (Prob.) |          |          |                                                   |



|                           |                                       |
|---------------------------|---------------------------------------|
| Cost per CLABSI prevented | Strongly dominant (0.80) <sup>‡</sup> |
| Cost per death prevented  | Strongly dominant (0.80) <sup>‡</sup> |

CLABSI = central line-associated bloodstream infection

Mean, median, 2.5% and 97.5% centile estimates for outputs from probabilistic sensitivity analysis of 10,000 model runs representing uncertainty in epidemiologic and economic parameters are reported. All mean, median, and percentile values are expressed per 1,000 patients to make the scale easier to interpret. Values have been rounded to 3 significant digits at most.

\*Costs are not presented separately for each outcome (CLABSI and death) because no additional cost was assumed to occur for death; discounted at 3%.

†Benefit of programme determined by subtracting programme ICU estimates from non-programme ICU estimates within the model

‡Probability that the programme is more effective and less costly than current practice

Figure 2 and online supplementary Figure S1 show the cost effectiveness planes comparing the joint density of incremental costs and incremental effects for 10,000 model iterations. Incremental refers to the difference in costs or effects between programme and non-programme ICUs. The X-axis represents the incremental level of effectiveness of an outcome and the Y-axis represents the additional total cost of achieving this outcome. Each data point in the scatterplot represents an estimated incremental cost effectiveness ratio for the outcome; as such, the scatterplot illustrates the distribution of incremental cost effectiveness ratios over a sample population. Points falling to the right of the Y-axis demonstrate that the programme is effective for preventing CLABSIs and averting deaths. Points falling above the X-axis represent the additional costs of the programme and points falling below the X-axis represent the economic cost savings from the programme. In Figure 2, because 80% of the points fall below the X-axis, there is an 80% probability that the programme reduces bloodstream infections and the infections' economic costs to hospitals compared with current practice. Figure 2 also demonstrates the presence of few extreme values (outlier incremental cost effectiveness ratios) in the model, indicating little uncertainty in the estimates of the quality improvement programme's cost effectiveness compared to current practice. Outliers add variability and uncertainty to the overall

1  
2  
3 cost effectiveness results and the existence of few such outliers in the cost effectiveness plane  
4  
5 supports the robustness of the programme as a dominant strategy.  
6  
7

8 Online supplementary figures S2 and S3 display tornado diagrams of the results of the  
9  
10 probabilistic sensitivity analysis. The opportunity cost of CLABSIs exerted the largest influence  
11  
12 on the cost effectiveness of the programme for preventing CLABSIs and deaths. As such,  
13  
14 hospitals implementing the programme should know the opportunity costs they face due to  
15  
16 CLABSIs. The opportunity cost is calculated as the potential incremental net revenue  
17  
18 opportunity per prevented CLABSI. We provide an example of how to perform this calculation  
19  
20 in the appendix. Discounting CLABSIs or deaths at 3% in addition to costs, does not change the  
21  
22 interpretation of our results. Similarly, discounting costs at 0% or 5% does not change the  
23  
24 interpretation of our results. Similarly, discounting costs at 0% or 5% does not change the  
25  
26 interpretation of our findings (see appendix Table D).  
27  
28  
29  
30

## 31 **DISCUSSION**

32 This study represents the first formal cost effectiveness analysis of a nationally  
33  
34 implemented quality improvement programme (the Keystone ICU project) in the US to decrease  
35  
36 CLABSIs in critically ill patients. One of the few large scale quality improvement projects to  
37  
38 demonstrate long term sustainability, this programme has the potential to reduce CLABSIs and  
39  
40 deaths at no additional cost to US hospitals.  
41  
42  
43  
44  
45

### 46 **Comparison with other studies**

47 Previous studies highlight both the importance and difficulty of developing a business  
48  
49 case for quality improvement. A business case exists if healthcare organisations investing in an  
50  
51 intervention reap a return on their investment.[37] Many prevention initiatives have suffered  
52  
53 from a lack of evidence supporting a positive return on investment for hospitals and payers.[38]  
54  
55  
56  
57  
58  
59  
60

1  
2  
3 Incentive misalignment results in hospitals incurring costs to implement quality improvement  
4 programmes while payers accrue the subsequent cost savings. A financial analysis of a  
5 replication of the Keystone ICU project in one tertiary hospital in Hawaii demonstrated that  
6 reducing CLABSIs actually resulted in lower profit margins, thus creating a perverse incentive to  
7 provide a lower quality of care.[39] A different study calculated that, for every CLABSI  
8 prevented, the programme costs \$5,404,[29] and suggested that it is cost saving when compared  
9 to the cost of an infection (which ranges from \$6,000 to over \$56,000[4 6 33 40 41]). However,  
10 both studies used inaccurate cost analyses that focused on the financial rather than the economic  
11 costs of CLABSIs. These studies also did not account for uncertainty in the cost or effect  
12 estimates.  
13

14 Our evaluation offers several improvements to these existing studies. First, whenever  
15 possible we used nationally representative data to determine provider salary and compensation  
16 costs, so as to increase the ability to generalise our findings. Second, we performed a  
17 probabilistic sensitivity analysis to quantify the uncertainty in our cost effectiveness estimates.  
18 Third, we considered the opportunity costs of CLABSIs rather than financial costs. Our estimate  
19 of the cost of a CLABSI is based on the foregone hospital revenue that results whenever an  
20 infection occurs. From the perspective of the hospital, reducing the cost of CLABSIs is  
21 tantamount to reducing this foregone revenue by redeploying ICU beds for new admissions.  
22 Finally, we extended the evaluation to consider deaths prevented as an additional outcome  
23 because of its interest to clinicians and patients.  
24

### 25 **Limitations of the study**

26  
27  
28  
29  
30  
31  
32  
33  
34  
35  
36  
37  
38  
39  
40  
41  
42  
43  
44  
45  
46  
47  
48  
49  
50  
51  
52  
53  
54  
55  
56  
57  
58  
59  
60

1  
2  
3  
4  
5  
6  
7  
8  
9  
0  
1  
2  
3  
4  
5  
6  
7  
8  
9  
20  
21  
22  
23  
24  
25  
26  
27  
28  
29  
0  
3  
2  
3  
3  
5  
6  
7  
8  
9  
40  
41  
42  
43  
44  
45  
46  
47  
48  
49  
50  
51  
52  
53  
54  
55  
56  
57  
58  
59  
6

This evaluation has several limitations. First, the impact of patient heterogeneity, such as demographics and clinical characteristics on baseline risk, treatment effect, or resource utilisation was not fully explored.[42] This evaluation sought instead to represent an average ICU experience, in part because the data needed to explore subgroups are not available, but more importantly because the intervention applies to patients irrespective of these differences. It would be impractical—and possibly unethical—to only use this programme in subgroups of patients for whom greater benefit is expected. The programme is based on evidence-based practices for inserting central venous catheters—practices that should apply equally to all patients. Second, we did not evaluate costs outside the acute hospital setting, such as rehabilitation costs or productivity losses for delays returning to work incurred by patients suffering CLABSIs. However, doing so would further support the cost effectiveness of the programme. We chose to examine costs from the perspective of the hospital because hospitals bear the greatest burden of nosocomial infection costs in the prospective payer system and demonstrating a business case is important for the dissemination of effective quality improvement programmes. Finally, this evaluation did not explore the use of antimicrobial catheters as an comparator because systematic reviews have come to differing conclusions about the extent of their effectiveness in preventing CLABSIs, and many of the trials have been small and of a low quality.[43 44] In addition, the choice facing hospital decision makers is not necessarily a mutually exclusive choice between the Keystone ICU project or the use of antimicrobial catheters. The results of Keystone ICU project already reflect the use of various types of catheters because the programme itself did not specify catheter type. The parameter estimate for effectiveness of the programme used in this evaluation was derived from a cluster randomised controlled trial. In this setting it can be expected that the utilisation of antimicrobial catheters should be balanced between the

1  
2  
3 intervention and control arms of the trial (though this was not explicitly measured), and the  
4 effectiveness estimate is attributable to the quality improvement programme itself. The  
5  
6  
7  
8  
9  
10  
11  
12  
13  
14  
15  
16  
17  
18  
19  
20  
21  
22  
23  
24  
25  
26  
27  
28  
29  
30  
31  
32  
33  
34  
35  
36  
37  
38  
39  
40  
41  
42  
43  
44  
45  
46  
47  
48  
49  
50  
51  
52  
53  
54  
55  
56  
57  
58  
59  
60

intervention and control arms of the trial (though this was not explicitly measured), and the effectiveness estimate is attributable to the quality improvement programme itself. The Keystone ICU project quality improvement programme is also a complex social intervention. Comparing it directly to technology or a device understates its broader effects, which may include reductions in sepsis and ventilator-associated pneumonia or reduced staff turnover resulting from an improved safety culture.[21] Data for these effects are limited in comparison to the data available for CLABSIs, but recent evidence suggests that the Keystone ICU project significantly reduced rates of ventilator associated pneumonia in Michigan ICUs.[9] Inclusion of these additional beneficial effects for the same set of costs would further support the cost effectiveness of the programme.

### Conclusions and implications of study findings

These findings have important implications for health care. Broad implementation of the Keystone ICU project in the US healthcare system could substantially reduce the morbidity and mortality associated with CLABSIs and their economic costs to hospitals. Although the Centers for Disease Control and Prevention has demonstrated that significant reductions in CLABSIs are indeed being realised for intensive care patients in the US,[45] 800 medium and large hospitals continue to have high CLABSIs rates.[46] Further dissemination of cost effective quality improvement programmes is needed. Although our analysis adopted a hospital perspective, payers also stand to benefit from the programme and can support dissemination efforts. Hospitals and payers should partner to reform the incentive structure facing hospitals in order to better support patient safety and quality. Payer support, such as covering or funding some intervention costs and imposing financial penalties on hospitals when patients develop CLABSIs, could encourage uptake and dissemination of the programme. Future evaluations of this quality

1  
2  
3 improvement programme in non-US settings can incorporate country specific costs or extend the  
4  
5 evaluation to consider additional outcomes, such as cases of ventilator-associated pneumonia  
6  
7 prevented. As more data and evidence emerges regarding the long-term costs and outcomes for  
8  
9 patients with CLABSI and other healthcare associated infections,[47] future economic  
0  
1 evaluations can incorporate this information to gauge the cost effectiveness of prevention and  
2  
3 quality improvement efforts.  
4  
5

6  
7  
8 To conclude, this multifaceted quality improvement programme, currently being  
9  
10 implemented by thousands of hospitals in the US, likely reduces unnecessary morbidity,  
11  
12 mortality, and economic costs associated with CLABSIs.  
13  
14  
15  
16  
17  
18  
19  
20  
21  
22  
23  
24  
25  
26  
27  
28  
29  
30  
31  
32  
33  
34  
35  
36  
37  
38  
39  
40  
41  
42  
43  
44  
45  
46  
47  
48  
49  
50  
51  
52  
53  
54  
55  
56  
57  
58  
59  
60

1  
2  
3 **Acknowledgements:** We thank Susan M. Turley for her assistance in editing the manuscript.  
4  
5  
6

7  
8 **Contributors:** KRH is the guarantor and had full access to all of the data in the study and takes  
9 responsibility for the integrity of the data and the accuracy of the data analysis. All the authors  
0 were involved in preparing this manuscript. KRH was responsible for the overall study design,  
1 data analysis, and interpretation of data, and wrote the initial draft of the manuscript. All other  
2 authors contributed to the study design, analysis and interpretation of data, and critical revision  
3 of the manuscript. LN, DOC, WJW, and PJP also provided supervision.  
4  
5  
6  
7  
8  
9  
20  
21  
22  
23

24 The study guarantor affirms that the manuscript is an honest, accurate, and transparent account of  
25 the study being reported; that no important aspects of the study have been omitted; and that any  
26 discrepancies from the study as planned (and, if relevant, registered) have been explained.  
27  
28  
29  
0

1 **Funding:** This study was conducted as part of KRH's doctoral training at the Johns Hopkins  
2 Bloomberg School of Public Health. KRH is supported by the Harry S. Truman Scholarship  
3 Foundation and by a training grant from the National Institutes of Health under award number  
4 T32 GM007309. The content is solely the responsibility of the authors and does not necessarily  
5 represent the official views of the National Institutes of Health. All of the researchers were  
6 independent of the sponsors, and neither sponsor had any influence over the study design;  
7 collection, analysis, or interpretation of the data; writing of the manuscript; or decision to submit  
8 it for publication.  
9  
40  
41  
42  
43  
44  
45  
46  
47  
48  
49  
50  
51  
52  
53  
54  
55  
56  
57  
58  
59  
6

1  
2  
3 **Role of the Sponsors:** The Truman Scholarship Foundation and the National Institutes of  
4 Health had played no direct role in any aspect of this study. The researchers were independent of  
5 the sponsors and neither sponsor had any influence over the study design, collection, analysis or  
6 interpretation of the data, writing of the manuscript, or decision to submit it for publication.  
7  
8  
9  
0  
1

2  
3  
4  
5 **Competing interests:** All authors have completed the Unified Competing Interest form at  
6 [www.icmje.org/coi\\_disclosure.pdf](http://www.icmje.org/coi_disclosure.pdf) (available on request from the corresponding author) and  
7 declare that they had (1) No financial support for the submitted work. (2) PJP reports: receiving  
8 grant or contract support from the Agency for Healthcare Research and Quality, the Gordon and  
9 Betty Moore Foundation (research related to patient safety and quality of care), the National  
20 Institutes of Health (acute lung injury research), and the American Medical Association Inc.  
21 (improve blood pressure control); honoraria from various healthcare organizations for speaking  
22 on patient safety and quality (the Leigh Bureau manages most of these engagements); and book  
23 royalties from the Penguin Group for his book *Safe Patients, Smart Hospitals*. Dr. Pronovost is a  
24 paid strategic advisor to the Gordon and Betty Moore Foundation; receives stock and fees to  
25 serve as a director for Cantel Medical; and is a founder of *Patient Doctor Technologies*, a startup  
26 company that seeks to enhance the partnership between patients and clinicians with an  
27 application called Doctella; (3) No spouses, partners, or children with relationships with  
28 commercial entities that might have an interest in the submitted work and (4) No non-financial  
29 interests that may be relevant to the submitted work.  
30  
31  
32  
33  
34  
35  
36  
37  
38  
39  
40  
41  
42  
43  
44  
45  
46  
47  
48  
49  
50  
51  
52

53 **Ethics approval:** Not required.  
54  
55  
56  
57  
58  
59  
60





## Figure legends

Figure 1 | Decision tree model. Decision tree model depicting programme versus no programme and its effects on outcomes in intensive care unit (ICU) patients. “Bloodstream infections” refers to central line-associated bloodstream infection.

Figure 2 | Cost effectiveness plane for central line-associated bloodstream infections prevented with 95% confidence ellipses. Values on both axes have been multiplied by 1,000 to yield incremental costs and effects expressed per 1,000 patients to aid interpretation. Incremental refers to the difference in costs or effects between programme and non-programme intensive care units. Cost values in US dollars. Boxes in the plot region display the percentage of the distribution of incremental cost-effectiveness ratios falling above or below \$0. The 95% confidence ellipses overlaid on the figure are calculated assuming a bivariate normal distribution and display the uncertainty in the incremental costs effectiveness ratios.

## References

1. Mermel LA. Prevention of intravascular catheter-related infections. *Ann Intern Med* 2000;132(5):391-402.
2. Burke JP. Infection control - a problem for patient safety. *N Engl J Med* 2003;348(7):651-6. doi: 10.1056/NEJMhpr020557.
3. Klevens RM, Edwards JR, Richards CL, Jr., *et al.* Estimating health care-associated infections and deaths in U.S. hospitals, 2002. *Public Health Rep* 2007;122(2):160-6.
4. O'Grady NP, Alexander M, Dellinger EP, *et al.* Guidelines for the prevention of intravascular catheter-related infections. *Infect Control Hosp Epidemiol* 2002;23(12):759-69. doi: 10.1086/502007.
5. Digiovine B, Chenoweth C, Watts C, *et al.* The attributable mortality and costs of primary nosocomial bloodstream infections in the intensive care unit. *Am J Respir Crit Care Med* 1999;160(3):976-81. doi: 10.1164/ajrccm.160.3.9808145.
6. Pittet D, Tarara D, Wenzel RP. Nosocomial bloodstream infection in critically ill patients. Excess length of stay, extra costs, and attributable mortality. *JAMA* 1994;271(20):1598-601.
7. Pronovost P, Needham D, Berenholtz S, *et al.* An intervention to decrease catheter-related bloodstream infections in the ICU. *N Engl J Med* 2006;355(26):2725-32. doi: 10.1056/NEJMoa061115.
8. Berenholtz SM, Pronovost PJ, Lipsett PA, *et al.* Eliminating catheter-related bloodstream infections in the intensive care unit. *Crit Care Med* 2004;32(10):2014-20. doi: 10.1097/01.ccm.0000142399.70913.2f.



- 1  
2  
3 empiric studies. *Value Health* 2007;10(4):305-16. doi: 10.1111/j.1524-  
4  
5 4733.2007.00175.x.  
6  
7  
8 17. Graves N, Harbarth S, Beyersmann J, *et al.* Estimating the cost of health care-associated  
9 infections: mind your p's and q's. *Clin Infect Dis* 2010;50(7):1017-21. doi:  
0 10.1086/651110.  
1  
2  
3  
4  
5 18. Veenstra DL, Saint S, Sullivan SD. Cost-effectiveness of antiseptic-impregnated central  
6 venous catheters for the prevention of catheter-related bloodstream infection. *JAMA*  
7 1999;282(6):554-60.  
8  
9  
0 19. Halton KA, Cook DA, Whitby M, *et al.* Cost effectiveness of antimicrobial catheters in the  
1 intensive care unit: addressing uncertainty in the decision. *Crit Care* 2009;13(2):R35.  
2 doi: 10.1186/cc7744.  
3  
4  
5  
6 20. Needham DM, Scales DC, Laupacis A, *et al.* A systematic review of the Charlson  
7 comorbidity index using Canadian administrative databases: a perspective on risk  
8 adjustment in critical care research. *J Crit Care* 2005;20(1):12-9.  
9  
0  
1  
2  
3  
4  
5  
6  
7 21. Pronovost PJ, Berenholtz SM, Goeschel C, *et al.* Improving patient safety in intensive care  
8 units in Michigan. *J Crit Care* 2008;23(2):207-21. doi: 10.1016/j.jcrc.2007.09.002.  
9  
0  
1  
2  
3  
4  
5  
6  
7 22. Pronovost PJ, Berenholtz SM, Needham DM. Translating evidence into practice: a model for  
8 large scale knowledge translation. *BMJ* 2008;337:a1714. doi: 10.1136/bmj.a1714.  
9  
0  
1  
2  
3  
4  
5  
6  
7 23. Fletcher S. Catheter-related bloodstream infection. *Contin Educ Anaesth Crit Care Pain*  
8 2005;5(2):49-51. doi: 10.1093/bjaceaccp/mki011.  
9  
0  
1  
2  
3  
4  
5  
6  
7 24. Brun-Buisson C. New technologies and infection control practices to prevent intravascular  
8 catheter-related infections. *Am J Respir Crit Care Med* 2001;164(9):1557-8. doi:  
9 10.1164/ajrccm.164.9.2109051.  
0  
1  
2  
3  
4  
5  
6  
7  
8  
9  
0  
1  
2  
3  
4  
5  
6  
7  
8  
9  
0  
1  
2  
3  
4  
5  
6  
7  
8  
9  
0

- 1  
2  
3  
4  
5  
6  
7  
8  
9  
0  
1  
2  
3  
4  
5  
6  
7  
8  
9  
20  
21  
22  
23  
24  
25  
26  
27  
28  
29  
0  
3  
2  
3  
3  
5  
6  
7  
8  
9  
40  
41  
42  
43  
44  
45  
46  
47  
48  
49  
50  
51  
52  
53  
54  
55  
56  
57  
58  
59  
6
25. Veenstra DL, Saint S, Saha S, *et al.* Efficacy of antiseptic-impregnated central venous catheters in preventing catheter-related bloodstream infection: a meta-analysis. *JAMA* 1999;281(3):261-7.
26. Martin MA, Pfaller MA, Wenzel RP. Coagulase-negative staphylococcal bacteremia. Mortality and hospital stay. *Ann Intern Med* 1989;110(1):9-16.
27. Smith RL, Meixler SM, Simberkoff MS. Excess mortality in critically ill patients with nosocomial bloodstream infections. *Chest* 1991;100(1):164-7.
28. Arnow PM, Quimosing EM, Beach M. Consequences of intravascular catheter sepsis. *Clin Infect Dis* 1993;16(6):778-84.
29. Waters HR, Korn R, Jr., Colantuoni E, *et al.* The business case for quality: economic analysis of the Michigan Keystone Patient Safety Program in ICUs. *Am J Med Qual* 2011;26(5):333-9. doi: 10.1177/1062860611410685.
30. Graves N, Weinhold D, Tong E, *et al.* Effect of healthcare-acquired infection on length of hospital stay and cost. *Infect Control Hosp Epidemiol* 2007;28(3):280-92. doi: 10.1086/512642.
31. Graves N. Economics and preventing hospital-acquired infection. *Emerg Infect Dis* 2004;10(4):561-6. doi: 10.3201/eid1004.020754.
32. Society of Critical Care Medicine. *Compensation of Critical Care Professionals*: Society of Critical Care Medicine, 2009.
33. Warren DK, Quadir WW, Hollenbeak CS, *et al.* Attributable cost of catheter-associated bloodstream infections among intensive care patients in a nonteaching hospital. *Crit Care Med* 2006;34(8):2084-9. doi: 10.1097/01.CCM.0000227648.15804.2D.

- 1  
2  
3  
4  
5  
6  
7  
8  
9  
10  
11  
12  
13  
14  
15  
16  
17  
18  
19  
20  
21  
22  
23  
24  
25  
26  
27  
28  
29  
30  
31  
32  
33  
34  
35  
36  
37  
38  
39  
40  
41  
42  
43  
44  
45  
46  
47  
48  
49  
50  
51  
52  
53  
54  
55  
56  
57  
58  
59  
60
34. American Hospital Association. *AHA Hospital Statistics. 2013 ed*: American Hospital Association, 2012.
  35. Wunsch H, Angus DC, Harrison DA, *et al*. Variation in critical care services across North America and Western Europe. *Crit Care Med* 2008;36(10):2787-93, e1-9. doi: 10.1097/CCM.0b013e318186aec8.
  36. Pronovost PJ, Goeschel CA, Colantuoni E, *et al*. Sustaining reductions in catheter related bloodstream infections in Michigan intensive care units: observational study. *BMJ* 2010;340:c309. doi: 10.1136/bmj.c309.
  37. Leatherman S, Berwick D, Iles D, *et al*. The business case for quality: case studies and an analysis. *Health Aff (Millwood)* 2003;22(2):17-30.
  38. Galvin RS, Delbanco S, Milstein A, *et al*. Has the leapfrog group had an impact on the health care market? *Health Aff (Millwood)* 2005;24(1):228-33. doi: 10.1377/hlthaff.24.1.228.
  39. Hsu E, Lin D, Evans SJ, *et al*. Doing well by doing good: assessing the cost savings of an intervention to reduce central line-associated bloodstream infections in a Hawaii hospital. *Am J Med Qual* 2014;29(1):13-9. doi: 10.1177/1062860613486173.
  40. Halton K, Graves N. Economic evaluation and catheter-related bloodstream infections. *Emerg Infect Dis* 2007;13(6):815-23. doi: 10.3201/eid1306.070048.
  41. Dimick JB, Pronovost PJ, Heitmiller RF, *et al*. Intensive care unit physician staffing is associated with decreased length of stay, hospital cost, and complications after esophageal resection. *Crit Care Med* 2001;29(4):753-8.
  42. Grutters JP, Sculpher M, Briggs AH, *et al*. Acknowledging patient heterogeneity in economic evaluation : a systematic literature review. *Pharmacoeconomics* 2013;31(2):111-23. doi: 10.1007/s40273-012-0015-4.

- 1  
2  
3  
4  
5  
6  
7  
8  
9  
0  
1  
2  
3  
4  
5  
6  
7  
8  
9  
20  
21  
22  
23  
24  
25  
26  
27  
28  
29  
0  
3  
2  
3  
3  
5  
6  
7  
8  
9  
40  
41  
42  
43  
44  
45  
46  
47  
48  
49  
50  
51  
52  
53  
54  
55  
56  
57  
58  
59  
6
43. Niel-Weise BS, Stijnen T, van den Broek PJ. Anti-infective-treated central venous catheters: a systematic review of randomized controlled trials. *Intensive Care Med* 2007;33(12):2058-68. doi: 10.1007/s00134-007-0897-3.
44. Hockenhull JC, Dwan K, Boland A, *et al.* The clinical effectiveness and cost-effectiveness of central venous catheters treated with anti-infective agents in preventing bloodstream infections: a systematic review and economic evaluation. *Health Technol Assess* 2008;12(12):iii-iv, xi-xii, 1-154.
45. Center for Disease Control and Prevention. *National and State Healthcare Association Infections Progress Report*. Atlanta, 2014.
46. Wise ME, Scott RD, 2nd, Baggs JM, *et al.* National estimates of central line-associated bloodstream infections in critical care patients. *Infect Control Hosp Epidemiol* 2013;34(6):547-54. doi: 10.1086/670629.
47. Dick A, Liu H, Zwanziger J, *et al.* Long-term survival and healthcare utilization outcomes attributable to sepsis and pneumonia. *BMC Health Serv Res* 2012;12:432. doi: 10.1186/1472-6963-12-432.



1  
2  
3  
4  
5  
6  
7  
8  
9  
0  
1  
2  
3  
4  
5  
6  
7  
8  
9  
20  
21  
22  
23  
24  
25  
26  
27  
28  
29  
0  
3  
2  
3  
3  
5  
6  
3  
8  
9  
40  
41  
42  
43  
44  
45  
46  
47  
48  
49  
50  
51  
52  
53  
54  
55  
56  
57  
58  
59  
6

For peer review only

1  
2  
3 **Cost effectiveness of a quality improvement programme to reduce central line-associated**  
4 **bloodstream infections in intensive care units in the United States**  
5  
6  
7  
8

9  
0 Kurt R Herzer, Louis Niessen, Dagna O Constenla, William J Ward Jr, Peter J Pronovost  
1

2  
3  
4  
5 Medical Scientist Training Program, Johns Hopkins School of Medicine, 1830 East Monument  
6  
7 Street, Baltimore, MD 21205, USA  
8

9  
10 Kurt R Herzer  
11

12  
13 *MD-PhD student*  
14  
15  
16

17 Centre for Applied Health Research and Delivery (CAHRD), Liverpool School of Tropical  
18  
19 Medicine, University of Warwick, Coventry, CV4 7AL, United Kingdom  
20

21  
22 Louis Niessen  
23

24  
25 *Professor*  
26  
27  
28

29 International Vaccine Access Center, Johns Hopkins Bloomberg School of Public Health, 855  
30  
31 North Wolfe Street, Baltimore, MD 21205, USA  
32  
33

34  
35 Dagna O Constenla  
36

37  
38 *Associate Scientist*  
39  
40  
41

42 Department of Health Policy and Management, Johns Hopkins Bloomberg School of Public  
43  
44 Health, 624 North Broadway Street, Baltimore, MD 21205, USA  
45  
46

47  
48 William J Ward Jr  
49  
50  
51  
52  
53  
54  
55  
56  
57  
58  
59  
60

1  
2  
3 *Associate Professor*  
4  
5  
6  
7

8 Armstrong Institute for Patient Safety and Quality, Johns Hopkins Medicine, 750 East Pratt  
9 Street, Baltimore, MD 21202, USA  
0

1 Peter J Pronovost  
2

3 *Professor*  
4  
5  
6  
7  
8  
9

20 Correspondence to: Kurt Herzer, 1830 East Monument Street, Baltimore, MD 21205, USA;  
21 [kherzer@jhmi.edu](mailto:kherzer@jhmi.edu); 443-900-2415  
22  
23  
24

25  
26  
27 Keywords: quality improvement, cost effectiveness, nosocomial infections, health policy,  
28 checklists  
29  
0

3  
2  
3  
3  
5 | Word Count: 3,424  
6  
7  
8  
9  
40  
41  
42  
43  
44  
45  
46  
47  
48  
49  
50  
51  
52  
53  
54  
55  
56  
57  
58  
59  
6

## Abstract

**Objective:** To assess the cost effectiveness of a multifaceted quality improvement programme focused on reducing central line-associated bloodstream infections in intensive care units.

**Design:** Cost effectiveness analysis using a decision tree model to compare programme to non-programme intensive care units.

**Setting:** United States (US).

**Population:** Adult patients in the intensive care unit.

**Costs:** Economic costs of the programme and of central line-associated bloodstream infections were estimated from the perspective of the hospital and presented in 2013 US dollars.

**Main outcome measures:** Central line-associated bloodstream infections prevented, deaths averted due to central line-associated bloodstream infections prevented, and incremental cost effectiveness ratios. Probabilistic sensitivity analysis was performed.

**Results:** Compared to current practice, the programme is strongly dominant and reduces bloodstream infections and deaths at no additional cost. The probabilistic sensitivity analysis showed that there was an almost 80% probability that the programme reduces bloodstream infections and the infections' economic costs to hospitals. The opportunity cost of a bloodstream infection to a hospital was the most important model parameter in these analyses.

**Conclusions:** This multifaceted quality improvement programme, as it is currently implemented by hospitals on an increasingly large scale in the US, likely reduces the economic costs of central line-associated bloodstream infections for US hospitals. Awareness among hospitals about the programme's benefits should enhance implementation. The programme's implementation has the potential to substantially reduce morbidity, mortality, and economic costs associated with central line-associated bloodstream infections.

## Article summary

### Strengths and limitations of this study

- This study was conducted according to best practices in cost effectiveness analysis and demonstrates that a multifaceted quality improvement programme can reduce the economic costs of central line-associated bloodstream infections for hospitals.
- We used nationally representative data sources to increase generalisability and performed a probabilistic sensitivity analysis to quantify the uncertainty in our cost effectiveness estimates.
- Due to data limitations we were unable to assess the impact of patient heterogeneity, such as demographics and clinical characteristics, on baseline risk, treatment effect, or resource utilisation. We did not evaluate costs outside the acute hospital setting, such as rehabilitation costs or productivity losses for delays returning to work.

## INTRODUCTION

Central line-associated bloodstream infections (CLABSI) are common, expensive to payers and patients, and potentially fatal.[1 2] Each year, nearly 80,000 Americans develop CLABSIs in the intensive care unit (ICU), and more than 25,000 of these patients die.[3] A single infection can cost payers as much as \$56,000, culminating in over \$2 billion in related costs per year in the United States.[4] CLABSIs in ICU patients have an estimated attributable mortality rate of 14 to 40%, with a prolonged length of stay of 7.5 to 25 days.[5 6]

The Keystone ICU project, first launched in Michigan in 2004 and since scaled across the United States, Spain, Peru, Pakistan, and the United Kingdom, has captured the interest and attention of patients, payers, and policymakers for its substantial, sustained, and scalable reductions in preventable nosocomial infections. Over 1,200 US hospitals are currently participating in this multifaceted quality improvement programme through *On the CUSP: Stop BSI*, a national collaborative, and many others are likely using checklists and infection prevention programmes in their ICUs as standard practice. The programme has been evaluated through prospective cohort studies,[7-10] retrospective observational studies using claims data,[11] and both cluster nonrandomised[12] and randomised controlled trials.[13] When viewed collectively, this evidence suggests that the programme is associated with substantial reductions in both CLABSIs and mortality in ICU patients.

In spite of commendable investment in this programme to manage the undesirable consequences of CLABSIs, an important question remains unanswered: compared with current practice, is this programme cost effective for US hospitals? Reporting of economic data in quality improvement studies is uncommon, and there are few formal cost effectiveness analyses of quality improvement programmes.[14-16] Similarly, because the estimated gross costs of

1  
2  
3 | CLABSIs to the healthcare system are very high, the conclusion that expanding infection control  
4  
5  
6 efforts will be cost saving (relative to the costs incurred by expanded efforts) is accepted without  
7  
8 rigorous analysis.[17] This paper examines the cost changes and effectiveness of the Keystone  
9  
0 ICU project from the perspective of the hospital using nationally representative data sources  
1  
2 from the United States.

## 3 4 5 6 7 8 **METHODS**

### 9 10 11 12 13 14 15 16 17 18 19 **Overview of the analysis**

20  
21  
22 We developed a decision tree model to address the choice faced at an individual hospital  
23  
24 about implementing the programme (Figure 1). The use of a decision tree approach is justified  
25  
26 by the short-term progression of CLABSIs. The model assumes that patients do not experience  
27  
28 other adverse effects of catheterisation, such as catheter colonisation leading to local infection,  
29  
0 hypersensitivity reactions, or mechanical complications such as pneumothorax. The Keystone  
1  
2 ICU project instead focused on infectious complications, because they are more common, more  
3  
4 costly, and often fatal.[18] Consistent with other economic evaluations of CLABSIs in the ICU  
5  
6 setting, we assumed that the consequences of infection are independent of age, patient disease  
7  
8 severity, and the causative organism.[18 19] These assumptions are congruent with the  
9  
0 programme itself, which does not discriminate between subgroups of patients based on these  
1  
2 factors.

3  
4  
5  
6  
7  
8  
9  
10  
11  
12  
13  
14  
15  
16  
17  
18  
19  
20  
21  
22  
23  
24  
25  
26  
27  
28  
29  
30  
31  
32  
33  
34  
35  
36  
37  
38  
39  
40  
41  
42  
43  
44  
45  
46  
47  
48  
49  
50  
51  
52  
53  
54  
55  
56  
57  
58  
59  
60  
61  
62  
63  
64  
65  
66  
67  
68  
69  
70  
71  
72  
73  
74  
75  
76  
77  
78  
79  
80  
81  
82  
83  
84  
85  
86  
87  
88  
89  
90  
91  
92  
93  
94  
95  
96  
97  
98  
99  
100  
101  
102  
103  
104  
105  
106  
107  
108  
109  
110  
111  
112  
113  
114  
115  
116  
117  
118  
119  
120  
121  
122  
123  
124  
125  
126  
127  
128  
129  
130  
131  
132  
133  
134  
135  
136  
137  
138  
139  
140  
141  
142  
143  
144  
145  
146  
147  
148  
149  
150  
151  
152  
153  
154  
155  
156  
157  
158  
159  
160  
161  
162  
163  
164  
165  
166  
167  
168  
169  
170  
171  
172  
173  
174  
175  
176  
177  
178  
179  
180  
181  
182  
183  
184  
185  
186  
187  
188  
189  
190  
191  
192  
193  
194  
195  
196  
197  
198  
199  
200  
201  
202  
203  
204  
205  
206  
207  
208  
209  
210  
211  
212  
213  
214  
215  
216  
217  
218  
219  
220  
221  
222  
223  
224  
225  
226  
227  
228  
229  
230  
231  
232  
233  
234  
235  
236  
237  
238  
239  
240  
241  
242  
243  
244  
245  
246  
247  
248  
249  
250  
251  
252  
253  
254  
255  
256  
257  
258  
259  
260  
261  
262  
263  
264  
265  
266  
267  
268  
269  
270  
271  
272  
273  
274  
275  
276  
277  
278  
279  
280  
281  
282  
283  
284  
285  
286  
287  
288  
289  
290  
291  
292  
293  
294  
295  
296  
297  
298  
299  
300  
301  
302  
303  
304  
305  
306  
307  
308  
309  
310  
311  
312  
313  
314  
315  
316  
317  
318  
319  
320  
321  
322  
323  
324  
325  
326  
327  
328  
329  
330  
331  
332  
333  
334  
335  
336  
337  
338  
339  
340  
341  
342  
343  
344  
345  
346  
347  
348  
349  
350  
351  
352  
353  
354  
355  
356  
357  
358  
359  
360  
361  
362  
363  
364  
365  
366  
367  
368  
369  
370  
371  
372  
373  
374  
375  
376  
377  
378  
379  
380  
381  
382  
383  
384  
385  
386  
387  
388  
389  
390  
391  
392  
393  
394  
395  
396  
397  
398  
399  
400  
401  
402  
403  
404  
405  
406  
407  
408  
409  
410  
411  
412  
413  
414  
415  
416  
417  
418  
419  
420  
421  
422  
423  
424  
425  
426  
427  
428  
429  
430  
431  
432  
433  
434  
435  
436  
437  
438  
439  
440  
441  
442  
443  
444  
445  
446  
447  
448  
449  
450  
451  
452  
453  
454  
455  
456  
457  
458  
459  
460  
461  
462  
463  
464  
465  
466  
467  
468  
469  
470  
471  
472  
473  
474  
475  
476  
477  
478  
479  
480  
481  
482  
483  
484  
485  
486  
487  
488  
489  
490  
491  
492  
493  
494  
495  
496  
497  
498  
499  
500  
501  
502  
503  
504  
505  
506  
507  
508  
509  
510  
511  
512  
513  
514  
515  
516  
517  
518  
519  
520  
521  
522  
523  
524  
525  
526  
527  
528  
529  
530  
531  
532  
533  
534  
535  
536  
537  
538  
539  
540  
541  
542  
543  
544  
545  
546  
547  
548  
549  
550  
551  
552  
553  
554  
555  
556  
557  
558  
559  
560  
561  
562  
563  
564  
565  
566  
567  
568  
569  
570  
571  
572  
573  
574  
575  
576  
577  
578  
579  
580  
581  
582  
583  
584  
585  
586  
587  
588  
589  
590  
591  
592  
593  
594  
595  
596  
597  
598  
599  
600  
601  
602  
603  
604  
605  
606  
607  
608  
609  
610  
611  
612  
613  
614  
615  
616  
617  
618  
619  
620  
621  
622  
623  
624  
625  
626  
627  
628  
629  
630  
631  
632  
633  
634  
635  
636  
637  
638  
639  
640  
641  
642  
643  
644  
645  
646  
647  
648  
649  
650  
651  
652  
653  
654  
655  
656  
657  
658  
659  
660  
661  
662  
663  
664  
665  
666  
667  
668  
669  
670  
671  
672  
673  
674  
675  
676  
677  
678  
679  
680  
681  
682  
683  
684  
685  
686  
687  
688  
689  
690  
691  
692  
693  
694  
695  
696  
697  
698  
699  
700  
701  
702  
703  
704  
705  
706  
707  
708  
709  
710  
711  
712  
713  
714  
715  
716  
717  
718  
719  
720  
721  
722  
723  
724  
725  
726  
727  
728  
729  
730  
731  
732  
733  
734  
735  
736  
737  
738  
739  
740  
741  
742  
743  
744  
745  
746  
747  
748  
749  
750  
751  
752  
753  
754  
755  
756  
757  
758  
759  
760  
761  
762  
763  
764  
765  
766  
767  
768  
769  
770  
771  
772  
773  
774  
775  
776  
777  
778  
779  
780  
781  
782  
783  
784  
785  
786  
787  
788  
789  
790  
791  
792  
793  
794  
795  
796  
797  
798  
799  
800  
801  
802  
803  
804  
805  
806  
807  
808  
809  
810  
811  
812  
813  
814  
815  
816  
817  
818  
819  
820  
821  
822  
823  
824  
825  
826  
827  
828  
829  
830  
831  
832  
833  
834  
835  
836  
837  
838  
839  
840  
841  
842  
843  
844  
845  
846  
847  
848  
849  
850  
851  
852  
853  
854  
855  
856  
857  
858  
859  
860  
861  
862  
863  
864  
865  
866  
867  
868  
869  
870  
871  
872  
873  
874  
875  
876  
877  
878  
879  
880  
881  
882  
883  
884  
885  
886  
887  
888  
889  
890  
891  
892  
893  
894  
895  
896  
897  
898  
899  
900  
901  
902  
903  
904  
905  
906  
907  
908  
909  
910  
911  
912  
913  
914  
915  
916  
917  
918  
919  
920  
921  
922  
923  
924  
925  
926  
927  
928  
929  
930  
931  
932  
933  
934  
935  
936  
937  
938  
939  
940  
941  
942  
943  
944  
945  
946  
947  
948  
949  
950  
951  
952  
953  
954  
955  
956  
957  
958  
959  
960  
961  
962  
963  
964  
965  
966  
967  
968  
969  
970  
971  
972  
973  
974  
975  
976  
977  
978  
979  
980  
981  
982  
983  
984  
985  
986  
987  
988  
989  
990  
991  
992  
993  
994  
995  
996  
997  
998  
999  
1000

1  
2  
3 The target population consisted of adult (18 years or older) ICU patients in accordance  
4 with studies of the Keystone ICU project and its subsequent replications.[13] Because costs and  
5 benefits only accrue while the programme is implemented, the time frame and analytic horizon  
6 are fundamentally the same. We used a time horizon of five years. This analysis was performed  
7 from the hospital's perspective. Our study aims to address the following question: is  
8 implementation of this quality improvement programme to decrease CLABSIs in the ICU a cost-  
9 effective approach when compared with current practice in US hospitals?  
10  
11  
12  
13  
14  
15  
16  
17  
18  
19  
20  
21  
22

### 23 **Quality improvement programme**

24 Details of the programme and its conceptual approach have been described  
25 elsewhere.[20-22] In brief, this multifaceted programme employed clinician communication  
26 tools, teamwork, and safety culture assessment and improvement tools (known as the  
27 Comprehensive Unit-based Safety Program [CUSP]), and a five-item, evidence-based checklist  
28 for correctly inserting central venous catheters. The five components of the checklist included  
29 using basic hand hygiene, exercising full barrier precautions, cleaning the skin with  
30 chlorhexidine, avoiding the femoral site when possible, and removing any unnecessary catheters.  
31 A model for translating evidence into practice identified and mitigated local barriers to  
32 implementation of the checklist.[22] Quarterly infection rates measured at the ICU level were  
33 used to monitor progress toward the goal of reducing CLABSIs. ~~The remainder of this paper uses  
34 the phrase "bloodstream infection" to refer to central-line-associated bloodstream infection.~~  
35  
36  
37  
38  
39  
40  
41  
42  
43  
44  
45  
46  
47  
48  
49  
50  
51  
52

### 53 **Model inputs**

54  
55  
56  
57  
58  
59  
60



Table 1 shows the key parameters used in the decision tree model, such as probabilities and cost inputs as well as the effectiveness of the programme, which are described in detail in the following sections.

**Table 1 | Parameters used in the decision tree model**

| Parameter                                                   | Distribution                                     | Source |
|-------------------------------------------------------------|--------------------------------------------------|--------|
| Probability of <u>CLABSI</u> *                              | Beta: 0.052 (SD 0.0074)                          | 18,25  |
| Death attributable to <u>CLABSI</u>                         | Beta: 0.15 (SD 0.056)                            | 6      |
| Incidence rate ratio of programme versus non-programme ICUs | Lognormal based on normal mean 0.19 (SD 0.13)    | 13     |
| <b>Total cost (\$):</b>                                     |                                                  |        |
| <u>CLABSI</u> (per patient)†                                | Lognormal based on normal mean 18,793 (SD 5,533) | 33     |
| Programme (per patient)†                                    | Lognormal based on normal mean 540 (SD 120)      | 29     |

CLABSI = central-line associated bloodstream infection, ICU = intensive care unit

\*Conditional probability of a CLABSI given exposure to a central venous catheter, assumes standard (non-antimicrobial) catheter.

†Discounted costs presented

### Risk of CLABSI and death

Estimates of the risk of CLABSI given exposure to a central venous catheter varied from 3.0% to as much as 16.0%. [23 24] We used a probability estimate of 5.2% for a standard catheter, derived from a meta analysis of 13 randomised controlled trials from a previous economic evaluation. [18 25] Estimates of the attributable mortality of CLABSI ranged from 14 to 40%. [5 6 26 27] We used a point estimate of 15%.

### Costs

Estimates of payer costs attributable to CLABSI varied widely, from as little as \$6,000 to over \$56,000. [4 6 18 28] The reasons for this variation can be attributed to the small sample

1  
2  
3 sizes of studies, challenges allocating inpatient costs, perspectives used, the types of cost  
4  
5 categories included, and the methodology used for estimation.[29] Existing studies have largely  
6  
7 focused on financial costs (or hospital charges or payer costs) rather than opportunity costs and  
8  
9 so they may incorrectly estimate the economic cost of CLABSIs to hospitals. We considered the  
10  
11 economic cost of CLABSIs in terms of the increased length of stay and variable costs associated  
12  
13 with that occurrence.[30] Given that a significant amount of hospital costs are fixed in the short  
14  
15 run, the economic viability of quality improvement programmes that reduce CLABSIs rests on  
16  
17 two things: deploying the bed-days freed by shorter lengths of stay for new admissions and  
18  
19 reducing utilization of medications and supplies. The value of the new admissions, (the potential  
20  
21 incremental net revenue opportunity per prevented infection) represents the economic cost of  
22  
23 infection and accordingly, the potential economic cost avoidance resulting from infection  
24  
25 prevention.[31] Using this approach, we estimated that the discounted cost of a CLABSI was  
26  
27 \$18,793 (see ~~the~~ appendix Tables A and B for details of this calculation).  
28  
29  
30  
31  
32  
33

34  
35 Start-up costs and recurring costs associated with the quality improvement programme  
36  
37 were assigned using an activity-based micro-costing of the programme performed in six hospitals  
38  
39 in Michigan.[29] We assumed that start-up costs occurred in the first year of implementation and  
40  
41 did not discount them. Capital items, such as bloodstream infection line carts, were annualised  
42  
43 assuming a five-year useful life and 3% discount rate. We included the opportunity costs of key  
44  
45 personnel whose time was committed to the programme even though a hospital may not incur  
46  
47 any financial costs related to personnel who are already on staff. We estimated this cost by  
48  
49 multiplying each staff person's percentage effort committed to the programme by an estimate of  
50  
51 that position's annual compensation. We used the Society of Critical Care Medicine's annual  
52  
53 compensation estimates from 2009 for critical care physicians, nurses, pharmacists, and  
54  
55  
56  
57  
58  
59  
60

respiratory therapists.[32] The salary for infection control preventionists was based on the Bureau of Labor Statistics's 2011 Occupational Employment Statistics and we added 30% benefits. ~~All compensation figures were adjusted to 2013 US dollars using the Consumer Price Index for medical care services.~~ Table 2 presents a detailed itemisation of the start-up costs and recurring costs of the programme. Start-up costs were approximately \$80,000 and recurring costs were approximately \$192,000 per hospital per year. Personnel costs were the largest contributor, comprising 95% of start-up costs and 89% of recurring costs.

**Table 2 | Itemisation of programme costs (per hospital)**

| Cost category                                                                    | Start-up costs | Recurring costs* |
|----------------------------------------------------------------------------------|----------------|------------------|
| Personnel (\$)                                                                   |                |                  |
| Critical care physicians (2 on average per hospital)                             | 26,004         | 71,953           |
| Nurses (8 on average per hospital)                                               | 44,406         | 75,306           |
| Respiratory therapists                                                           | 4,605          | 7,923            |
| Infection control preventionists                                                 | 1,981          | 7,855            |
| Pharmacists                                                                      | 2,725          | 7,962            |
| Education and Training (\$)                                                      |                |                  |
| Education and training expenses                                                  | 3,579          |                  |
| Capital Items (\$)                                                               |                |                  |
| <del>CLABSI</del> line cart/central line insertion cart (annual equivalent cost) | 426            | 426              |
| Materials (\$)                                                                   |                |                  |
| Chlorohexidine                                                                   |                | 2,378            |
| Oral care kits                                                                   |                | 6,933            |
| Sterile central line dressing kits                                               |                | 11,555           |
| Total (\$)                                                                       | 83,725         | 192,292          |

~~CLABSI~~ = central line-associated bloodstream infection

\*Recurring costs occur each year that the intervention is in place; as such, this total represents the annual recurring cost (not discounted as presented here).

We estimated a per patient cost of the programme by deriving an average number of ICU patients per hospital who had central venous catheters (the patients most likely to benefit from the programme's prevention efforts). To calculate this, we first derived a national annual cohort

1  
2  
3 of ICU patients exposed to central venous catheters by multiplying the total annual ICU  
4 admissions in the US by an estimate of the proportion of patients admitted to an ICU that receive  
5 central venous catheters.[33] We then divided this group of ICU admissions with central venous  
6 catheters by the number of hospitals that reported having adult ICUs in the American Hospital  
7 Association Annual Survey of Hospitals,[34] yielding an average number of “exposed” patients  
8 per hospital. Finally, we divided the total costs of the programme per hospital by the number of  
9 patients per hospital to yield an average cost for the programme per patient of \$540 (standard  
10 deviation, 120). Appendix Table C contains additional details of this calculation, including the  
11 uncertainty ranges incorporated into the estimate. based on published estimates and the  
12 American Hospital Association’s Annual Survey of Hospitals, yielding \$540 per patient (see the  
13 appendix for details of this calculation)-[34 35]

14 All costs were adjusted to 2013 US dollars using the Consumer Price Index for medical  
15 care services. Recurring costs were discounted by 3% annually. In separate sensitivity analyses,  
16 we examined the effect of not discounting costs and of discounting costs by 5%.

## Effectiveness

17  
18 We based our estimate of the programme’s effectiveness on a cluster randomised  
19 controlled trial that found an 81% reduction in CLABSI rates comparing programme ICUs to  
20 control ICUs (incidence rate ratio, 0.19; 95% confidence interval, 0.06–0.57).[13] We used the  
21 confidence interval of this point estimate, a measure of uncertainty in the programme’s  
22 effectiveness, to derive a standard deviation of the estimate for probabilistic sensitivity analysis.  
23 This effectiveness parameter was measured at the ICU level but in our model we assumed that it  
24 applied to individual patients ~~(considering all patients together)~~. This ecological assumption was



## Probabilistic sensitivity analyses

We conducted a probabilistic sensitivity analysis to account for uncertainty in the model's input parameters. We used Monte Carlo simulation to perform 10,000 iterations of the model, simultaneously sampling each parameter from an underlying distribution that reflects the degree of uncertainty in the parameter estimate. Uncertainty in parameter estimates was obtained from the confidence intervals or standard deviations published with the point estimates. Table 1 presents the modelled distributions, point estimates, and standard deviations uncertainty ranges applied to for the key model parameters. All analyses were performed using Microsoft Excel (Microsoft Corporation; Redmond, WA) with @Risk (Palisade Corporation; Ithaca, NY).

## RESULTS

Table 3 compares programme and non-programme ICU costs and outcomes for CLABSIs prevented and deaths averted. The quality improvement programme ~~reduces-prevents 42 CLABSIs per 1,000 patients~~ and averts 6 deaths per 1,000 patients at no additional cost in the base case analysis, ~~and-representing~~ ings a dominant strategy when compared with current practice. ~~Table 3 compares programme and non-programme costs and outcomes for prevented and deaths prevented.~~

**Table 3 | Comparison of costs and outcomes between programme and non-programme intensive care units (ICUs)**

|                   | Mean    | Median  | 2.5 <sup>th</sup> – 97.5 <sup>th</sup> Percentile |
|-------------------|---------|---------|---------------------------------------------------|
| Non-programme ICU |         |         |                                                   |
| <u>CLABSIs</u>    | 52      | 52      | 39 – 66                                           |
| Deaths            | 8       | 8       | 2 – 14                                            |
| Costs (S)*        | 987,000 | 937,000 | 488,000 – 1,760,000                               |
| Programme ICU     |         |         |                                                   |

|                                              |                                       |          |                     |
|----------------------------------------------|---------------------------------------|----------|---------------------|
| <u>CLABSIs</u>                               | 10                                    | 9        | 3 – 29              |
| Deaths                                       | 2                                     | 1        | 0 – 5               |
| Costs (\$)*                                  | 738,000                               | 710,000  | 453,000 – 1,190,000 |
| Benefit of programme <sup>†</sup>            |                                       |          |                     |
| <u>CLABSIs</u> prevented                     | 42                                    | 42       | 23 – 58             |
| Deaths <u>averted</u>                        | 6                                     | 6        | 2 – 12              |
| Net costs (\$)                               | -249,000                              | -221,000 | -976,000 – 300,000  |
| Incremental cost effectiveness ratio (Prob.) |                                       |          |                     |
| Cost per <u>CLABSI</u> prevented             | Strongly dominant (0.80) <sup>‡</sup> |          |                     |
| Cost per death prevented                     | Strongly dominant (0.80) <sup>‡</sup> |          |                     |

CLABSI = central line-associated bloodstream infection

Mean, median, 2.5% and 97.5% centile estimates for outputs from probabilistic sensitivity analysis of 10,000 model runs representing uncertainty in epidemiologic and economic parameters are reported. All mean, median, and percentile values are expressed per 1,000 patients to make the scale easier to interpret. Values have been rounded to 3 significant digits at most.

\*Costs are not presented separately for each outcome (CLABSI and death) because no additional cost was assumed to occur for death; discounted at 3%.

<sup>†</sup>Benefit of programme determined by subtracting programme ICU estimates from non-programme ICU estimates within the model

<sup>‡</sup>Probability that the programme is more effective and less costly than current practice

Figure 2 and online supplementary Figure S1 show the cost effectiveness planes comparing the joint density of incremental costs and incremental effects for 10,000 model iterations. Incremental refers to the difference in costs or effects between programme and non-programme ICUs. The X-axis represents the incremental level of effectiveness of an outcome and the Y-axis represents the additional total cost of achieving this outcome. Each data point in the scatterplot represents an estimated incremental cost effectiveness ratio for the outcome; as such, the scatterplot illustrates the distribution of incremental cost effectiveness ratios over a sample population. Points falling to the right of the Y-axis demonstrate that the programme is effective for preventing CLABSIs and averting deaths. Points falling above the X-axis represent the additional costs of the programme and points falling below the X-axis represent the economic cost savings from the programme. In Figure 2, because 80% of the points fall below the X-axis, there is an 80% probability that the programme reduces bloodstream infections and the infections'





1  
2  
3 ellipses cross the horizontal axis, indicating less than 95% confidence that the intervention is  
4  
5  
6 dominant.  
7

8 Online supplementary figures S~~24~~ and S~~35~~ display tornado diagrams of the results of the  
9 probabilistic sensitivity analysis. The opportunity cost of CLABSIs exerted the largest influence  
10 on the cost effectiveness of the programme for preventing CLABSIs and deaths. As such,  
11 hospitals implementing the programme should know the opportunity costs they face due to  
12 CLABSIs. The opportunity cost is calculated as the potential incremental net revenue  
13 opportunity per prevented CLABSI. We provide an example of how to perform this calculation  
14 in the appendix. Discounting CLABSIs or deaths at 3% in addition to costs, does not change the  
15 interpretation of our results. Similarly, discounting costs at 0% or 5% does not change the  
16 interpretation of our findings (see supplementary appendix Table D).  
17  
18  
19  
20  
21  
22  
23  
24  
25  
26  
27  
28  
29  
30

## 31 **DISCUSSION**

32 This study represents the first formal cost effectiveness analysis of a nationally  
33 implemented quality improvement programme (the Keystone ICU project) in the US to decrease  
34 CLABSIs in critically ill patients. One of the few large scale quality improvement projects to  
35 demonstrate long term sustainability, this programme has the potential to reduce CLABSIs and  
36 deaths at no additional cost to US hospitals.  
37  
38  
39

### 40 **Comparison with other studies**

41 Previous studies highlight both the importance and difficulty of developing a business  
42 case for quality improvement. A business case exists if healthcare organisations investing in an  
43 intervention reap a return on their investment.[37] Many prevention initiatives have suffered  
44 from a lack of evidence supporting a positive return on investment for hospitals and payers.[38]  
45  
46  
47  
48  
49  
50  
51  
52  
53  
54  
55  
56  
57  
58  
59  
60

1  
2  
3 Incentive misalignment results in hospitals incurring costs to implement quality improvement  
4 programmes while payers accrue the subsequent cost savings. A financial analysis of a  
5 replication of the Keystone ICU project in one tertiary hospital in Hawaii demonstrated that  
6 reducing CLABSIs actually resulted in lower profit margins, thus creating a perverse incentive to  
7 provide a lower quality of care.[39] A different study calculated that, for every CLABSI  
8 prevented, the programme costs \$5,404,[29] and suggested that it is cost saving when compared  
9 to the cost of an infection (which ranges from \$6,000 to over \$56,000[4 6 33 40 41]). However,  
10 both studies used inaccurate cost analyses that focused on the financial rather than the economic  
11 costs of CLABSIs. These studies also did not account for uncertainty in the cost or effect  
12 estimates.

13  
14 Our evaluation offers several improvements to these existing studies. First, whenever  
15 possible we used nationally representative data to determine provider salary and compensation  
16 costs, so as to increase the ability to generalise our findings. Second, we performed a  
17 probabilistic sensitivity analysis to quantify the uncertainty in our cost effectiveness estimates.  
18 Third, we considered the opportunity costs of CLABSIs rather than financial costs. Our estimate  
19 of the cost of a CLABSI is based on the foregone hospital revenue that results whenever an  
20 infection occurs. From the perspective of the hospital, reducing the cost of CLABSIs is  
21 tantamount to reducing this foregone revenue by redeploying ICU beds for new admissions.  
22 Finally, we extended the evaluation to consider deaths prevented as an additional outcome  
23 because of its interest to clinicians and patients.

### 24 25 26 27 28 29 30 31 32 33 34 35 36 37 38 39 40 41 42 43 44 45 46 47 48 49 50 51 52 53 **Limitations of the study** 54 55 56 57 58 59 60

1  
2  
3  
4  
5  
6  
7  
8  
9  
10  
11  
12  
13  
14  
15  
16  
17  
18  
19  
20  
21  
22  
23  
24  
25  
26  
27  
28  
29  
30  
31  
32  
33  
34  
35  
36  
37  
38  
39  
40  
41  
42  
43  
44  
45  
46  
47  
48  
49  
50  
51  
52  
53  
54  
55  
56  
57  
58  
59  
60

This evaluation has several limitations. First, the impact of patient heterogeneity, such as demographics and clinical characteristics on baseline risk, treatment effect, or resource utilisation was not fully explored.[42] This evaluation sought instead to represent an average ICU experience, in part because the data needed to explore subgroups are not available, but more importantly because the intervention applies to patients irrespective of these differences. It would be impractical—and possibly unethical—to only use this programme in subgroups of patients for whom greater benefit is expected. The programme is based on evidence-based practices for inserting central venous catheters—practices that should apply equally to all patients. Second, we did not evaluate costs outside the acute hospital setting, such as rehabilitation costs or productivity losses for delays returning to work incurred by patients suffering CLABSIs. However, doing so would further support the cost effectiveness of the programme. We chose to examine costs from the perspective of the hospital because hospitals bear the greatest burden of nosocomial infection costs in the prospective payer system and demonstrating a business case is important for the dissemination of effective quality improvement programmes. Finally, this evaluation did not explore the use of antimicrobial catheters as an comparator because systematic reviews have come to differing conclusions about the extent of their effectiveness in preventing CLABSIs, and many of the trials have been small and of a low quality.[43 44] In addition, the choice facing hospital decision makers is not necessarily a mutually exclusive choice between the Keystone ICU project or the use of antimicrobial catheters. The results of Keystone ICU project already reflect the use of various types of catheters because the programme itself did not specify catheter type. The parameter estimate for effectiveness of the programme used in this evaluation was derived from a cluster randomised controlled trial. In this setting it can be expected that the utilisation of antimicrobial catheters should be balanced between the

1  
2  
3 intervention and control arms of the trial (though this was not explicitly measured), and the  
4 effectiveness estimate is attributable to the quality improvement programme itself. The  
5  
6  
7  
8  
9  
10  
11  
12  
13  
14  
15  
16  
17  
18  
19  
20  
21  
22  
23  
24  
25  
26  
27  
28  
29  
30  
31  
32  
33  
34  
35  
36  
37  
38  
39  
40  
41  
42  
43  
44  
45  
46  
47  
48  
49  
50  
51  
52  
53  
54  
55  
56  
57  
58  
59  
60

intervention and control arms of the trial (though this was not explicitly measured), and the effectiveness estimate is attributable to the quality improvement programme itself. The Keystone ICU project quality improvement programme is also a complex social intervention. Comparing it directly to technology or a device understates its broader effects, which may include reductions in sepsis and ventilator-associated pneumonia or reduced staff turnover resulting from an improved safety culture.[21] Data for these effects are limited in comparison to the data available for [CLABSIs](#), but recent evidence suggests that the Keystone ICU project significantly reduced rates of ventilator associated pneumonia in Michigan ICUs.[9] Inclusion of these additional beneficial effects for the same set of costs would further support the cost effectiveness of the programme.

### Conclusions and implications of study findings

These findings have important implications for health care. Broad implementation of the Keystone ICU project in the US healthcare system could substantially reduce the morbidity and mortality associated with [CLABSIs](#) and their economic costs to hospitals. Although the Centers for Disease Control and Prevention has demonstrated that significant reductions in [CLABSIs](#) are indeed being realised for intensive care patients in the US,[45] 800 medium and large hospitals continue to have high [CLABSIs](#) rates.[46] Further dissemination of cost effective quality improvement programmes is needed. Although our analysis adopted a hospital perspective, payers also stand to benefit from the programme and can support dissemination efforts. Hospitals and payers should partner to reform the incentive structure facing hospitals in order to better support patient safety and quality. Payer support, such as covering or funding some intervention costs and imposing financial penalties on hospitals when patients develop [CLABSIs](#), could encourage uptake and dissemination of the programme. Future evaluations of this quality

1  
2  
3 improvement programme in non-US settings can incorporate country specific costs or extend the  
4  
5 evaluation to consider additional outcomes, such as cases of ventilator-associated pneumonia  
6  
7 prevented. As more data and evidence emerges regarding the long-term costs and outcomes for  
8  
9 patients with CLABSI and other healthcare associated infections,[47] future economic  
10  
11 evaluations can incorporate this information to gauge the cost effectiveness of prevention and  
12  
13 quality improvement efforts.  
14  
15

16  
17 To conclude, this multifaceted quality improvement programme, currently being  
18  
19 implemented by thousands of hospitals in the US, likely reduces unnecessary morbidity,  
20  
21 mortality, and economic costs associated with CLABSIs.  
22  
23  
24  
25  
26  
27  
28  
29  
30  
31  
32  
33  
34  
35  
36  
37  
38  
39  
40  
41  
42  
43  
44  
45  
46  
47  
48  
49  
50  
51  
52  
53  
54  
55  
56  
57  
58  
59  
60

1  
2  
3 **Acknowledgements:** We thank Susan M. Turley for her assistance in editing the manuscript.  
4  
5  
6

7  
8 **Contributors:** KRH is the guarantor and had full access to all of the data in the study and takes  
9 responsibility for the integrity of the data and the accuracy of the data analysis. All the authors  
0 were involved in preparing this manuscript. KRH was responsible for the overall study design,  
1 data analysis, and interpretation of data, and wrote the initial draft of the manuscript. All other  
2 authors contributed to the study design, analysis and interpretation of data, and critical revision  
3 of the manuscript. LN, DOC, WJW, and PJP also provided supervision.  
4  
5  
6  
7  
8  
9  
20  
21  
22  
23

24 The study guarantor affirms that the manuscript is an honest, accurate, and transparent account of  
25 the study being reported; that no important aspects of the study have been omitted; and that any  
26 discrepancies from the study as planned (and, if relevant, registered) have been explained.  
27  
28  
29  
0

1 **Funding:** This study was conducted as part of KRH's doctoral training at the Johns Hopkins  
2 Bloomberg School of Public Health. KRH is supported by the Harry S. Truman Scholarship  
3 Foundation and by a training grant from the National Institutes of Health under award number  
4 T32 GM007309. The content is solely the responsibility of the authors and does not necessarily  
5 represent the official views of the National Institutes of Health. All of the researchers were  
6 independent of the sponsors, and neither sponsor had any influence over the study design;  
7 collection, analysis, or interpretation of the data; writing of the manuscript; or decision to submit  
8 it for publication.  
9  
40  
41  
42  
43  
44  
45  
46  
47  
48  
49  
50  
51  
52  
53  
54  
55  
56  
57  
58  
59  
6

1  
2  
3 **Role of the Sponsors:** The Truman Scholarship Foundation and the National Institutes of  
4 Health had played no direct role in any aspect of this study. The researchers were independent of  
5 the sponsors and neither sponsor had any influence over the study design, collection, analysis or  
6 interpretation of the data, writing of the manuscript, or decision to submit it for publication.  
7  
8  
9  
0  
1

2  
3  
4  
5 **Competing interests:** All authors have completed the Unified Competing Interest form at  
6 [www.icmje.org/coi\\_disclosure.pdf](http://www.icmje.org/coi_disclosure.pdf) (available on request from the corresponding author) and  
7 declare that they had (1) No financial support for the submitted work. (2) PJP reports: receiving  
8 grant or contract support from the Agency for Healthcare Research and Quality, the Gordon and  
9 Betty Moore Foundation (research related to patient safety and quality of care), the National  
20 Institutes of Health (acute lung injury research), and the American Medical Association Inc.  
21 (improve blood pressure control); honoraria from various healthcare organizations for speaking  
22 on patient safety and quality (the Leigh Bureau manages most of these engagements); and book  
23 royalties from the Penguin Group for his book *Safe Patients, Smart Hospitals*. Dr. Pronovost is a  
24 paid strategic advisor to the Gordon and Betty Moore Foundation; receives stock and fees to  
25 serve as a director for Cantel Medical; and is a founder of *Patient Doctor Technologies*, a startup  
26 company that seeks to enhance the partnership between patients and clinicians with an  
27 application called Doctella; (3) No spouses, partners, or children with relationships with  
28 commercial entities that might have an interest in the submitted work and (4) No non-financial  
29 interests that may be relevant to the submitted work.  
30  
31  
32  
33  
34  
35  
36  
37  
38  
39  
40  
41  
42  
43  
44  
45  
46  
47  
48  
49  
50  
51  
52

53 **Ethics approval:** Not required.  
54  
55  
56  
57  
58  
59  
60





## Figure legends

Figure 1 | Decision tree model. Decision tree model depicting programme versus no programme and its effects on outcomes in intensive care unit (ICU) patients. “Bloodstream infections” refers to central line-associated bloodstream infection.

Figure 2 | Cost effectiveness plane for central line-associated bloodstream infections prevented with 95% confidence ellipses. Values on both axes have been multiplied by 1,000 to yield incremental costs and effects expressed per 1,000 patients to aid interpretation. Incremental refers to the difference in costs or effects between programme and non-programme intensive care units. Cost values in US dollars. Boxes in the plot region display the percentage of the distribution of incremental cost-effectiveness ratios falling above or below \$0. The 95% confidence ellipses overlaid on the figure are calculated assuming a bivariate normal distribution and display the uncertainty in the incremental costs effectiveness ratios.

## References

1. Mermel LA. Prevention of intravascular catheter-related infections. *Ann Intern Med* 2000;132(5):391-402.
2. Burke JP. Infection control - a problem for patient safety. *N Engl J Med* 2003;348(7):651-6. doi: 10.1056/NEJMhpr020557.
3. Klevens RM, Edwards JR, Richards CL, Jr., *et al.* Estimating health care-associated infections and deaths in U.S. hospitals, 2002. *Public Health Rep* 2007;122(2):160-6.
4. O'Grady NP, Alexander M, Dellinger EP, *et al.* Guidelines for the prevention of intravascular catheter-related infections. *Infect Control Hosp Epidemiol* 2002;23(12):759-69. doi: 10.1086/502007.
5. Digiovine B, Chenoweth C, Watts C, *et al.* The attributable mortality and costs of primary nosocomial bloodstream infections in the intensive care unit. *Am J Respir Crit Care Med* 1999;160(3):976-81. doi: 10.1164/ajrccm.160.3.9808145.
6. Pittet D, Tarara D, Wenzel RP. Nosocomial bloodstream infection in critically ill patients. Excess length of stay, extra costs, and attributable mortality. *JAMA* 1994;271(20):1598-601.
7. Pronovost P, Needham D, Berenholtz S, *et al.* An intervention to decrease catheter-related bloodstream infections in the ICU. *N Engl J Med* 2006;355(26):2725-32. doi: 10.1056/NEJMoa061115.
8. Berenholtz SM, Pronovost PJ, Lipsett PA, *et al.* Eliminating catheter-related bloodstream infections in the intensive care unit. *Crit Care Med* 2004;32(10):2014-20. doi: 10.1097/01.ccm.0000142399.70913.2f.

- 1  
2  
3  
4  
5  
6  
7  
8  
9  
0  
1  
2  
3  
4  
5  
6  
7  
8  
9  
20  
21  
22  
23  
24  
25  
26  
27  
28  
29  
0  
3  
2  
3  
3  
5  
6  
7  
8  
9  
40  
41  
42  
43  
44  
45  
46  
47  
48  
49  
50  
51  
52  
53  
54  
55  
56  
57  
58  
59  
6  
9. Berenholtz SM, Pham JC, Thompson DA, *et al.* Collaborative cohort study of an intervention to reduce ventilator-associated pneumonia in the intensive care unit. *Infect Control Hosp Epidemiol* 2011;32(4):305-14. doi: 10.1086/658938.
10. Lin DM, Weeks K, Bauer L, *et al.* Eradicating central line-associated bloodstream infections statewide: the Hawaii experience. *Am J Med Qual* 2012;27(2):124-9. doi: 10.1177/1062860611414299.
11. Lipitz-Snyderman A, Steinwachs D, Needham DM, *et al.* Impact of a statewide intensive care unit quality improvement initiative on hospital mortality and length of stay: retrospective comparative analysis. *BMJ* 2011;342:d219. doi: 10.1136/bmj.d219.
12. Bion J, Richardson A, Hibbert P, *et al.* 'Matching Michigan': a 2-year stepped interventional programme to minimise central venous catheter-blood stream infections in intensive care units in England. *BMJ Qual Saf* 2013;22(2):110-23. doi: 10.1136/bmjqs-2012-001325.
13. Marsteller JA, Sexton JB, Hsu YJ, *et al.* A multicenter, phased, cluster-randomized controlled trial to reduce central line-associated bloodstream infections in intensive care units. *Crit Care Med* 2012;40(11):2933-9. doi: 10.1097/CCM.0b013e31825fd4d8.
14. Niessen LW, Grijseels EW, Rutten FF. The evidence-based approach in health policy and health care delivery. *Soc Sci Med* 2000;51(6):859-69.
15. Grimshaw JM, Thomas RE, MacLennan G, *et al.* Effectiveness and efficiency of guideline dissemination and implementation strategies. *Health Technol Assess* 2004;8(6):iii-iv, 1-72.
16. Hoomans T, Evers SM, Ament AJ, *et al.* The methodological quality of economic evaluations of guideline implementation into clinical practice: a systematic review of

- 1  
2  
3 empiric studies. *Value Health* 2007;10(4):305-16. doi: 10.1111/j.1524-  
4  
5 4733.2007.00175.x.  
6  
7
- 8 17. Graves N, Harbarth S, Beyersmann J, *et al.* Estimating the cost of health care-associated  
9 infections: mind your p's and q's. *Clin Infect Dis* 2010;50(7):1017-21. doi:  
0  
1 10.1086/651110.  
2  
3
- 4 18. Veenstra DL, Saint S, Sullivan SD. Cost-effectiveness of antiseptic-impregnated central  
5 venous catheters for the prevention of catheter-related bloodstream infection. *JAMA*  
6  
7 1999;282(6):554-60.  
8  
9
- 10 19. Halton KA, Cook DA, Whitby M, *et al.* Cost effectiveness of antimicrobial catheters in the  
11 intensive care unit: addressing uncertainty in the decision. *Crit Care* 2009;13(2):R35.  
12  
13 doi: 10.1186/cc7744.  
14  
15
- 16 20. Needham DM, Scales DC, Laupacis A, *et al.* A systematic review of the Charlson  
17 comorbidity index using Canadian administrative databases: a perspective on risk  
18  
19 adjustment in critical care research. *J Crit Care* 2005;20(1):12-9.  
20  
21
- 22 21. Pronovost PJ, Berenholtz SM, Goeschel C, *et al.* Improving patient safety in intensive care  
23 units in Michigan. *J Crit Care* 2008;23(2):207-21. doi: 10.1016/j.jcrc.2007.09.002.  
24  
25
- 26 22. Pronovost PJ, Berenholtz SM, Needham DM. Translating evidence into practice: a model for  
27 large scale knowledge translation. *BMJ* 2008;337:a1714. doi: 10.1136/bmj.a1714.  
28  
29
- 30 23. Fletcher S. Catheter-related bloodstream infection. *Contin Educ Anaesth Crit Care Pain*  
31 2005;5(2):49-51. doi: 10.1093/bjaceaccp/mki011.  
32  
33
- 34 24. Brun-Buisson C. New technologies and infection control practices to prevent intravascular  
35 catheter-related infections. *Am J Respir Crit Care Med* 2001;164(9):1557-8. doi:  
36  
37 10.1164/ajrccm.164.9.2109051.  
38  
39  
40  
41  
42  
43  
44  
45  
46  
47  
48  
49  
50  
51  
52  
53  
54  
55  
56  
57  
58  
59  
60

- 1  
2  
3  
4  
5  
6  
7  
8  
9  
0  
1  
2  
3  
4  
5  
6  
7  
8  
9  
20  
21  
22  
23  
24  
25  
26  
27  
28  
29  
0  
3  
2  
3  
3  
5  
6  
7  
8  
9  
40  
41  
42  
43  
44  
45  
46  
47  
48  
49  
50  
51  
52  
53  
54  
55  
56  
57  
58  
59  
6
25. Veenstra DL, Saint S, Saha S, *et al.* Efficacy of antiseptic-impregnated central venous catheters in preventing catheter-related bloodstream infection: a meta-analysis. *JAMA* 1999;281(3):261-7.
26. Martin MA, Pfaller MA, Wenzel RP. Coagulase-negative staphylococcal bacteremia. Mortality and hospital stay. *Ann Intern Med* 1989;110(1):9-16.
27. Smith RL, Meixler SM, Simberkoff MS. Excess mortality in critically ill patients with nosocomial bloodstream infections. *Chest* 1991;100(1):164-7.
28. Arnow PM, Quimosing EM, Beach M. Consequences of intravascular catheter sepsis. *Clin Infect Dis* 1993;16(6):778-84.
29. Waters HR, Korn R, Jr., Colantuoni E, *et al.* The business case for quality: economic analysis of the Michigan Keystone Patient Safety Program in ICUs. *Am J Med Qual* 2011;26(5):333-9. doi: 10.1177/1062860611410685.
30. Graves N, Weinhold D, Tong E, *et al.* Effect of healthcare-acquired infection on length of hospital stay and cost. *Infect Control Hosp Epidemiol* 2007;28(3):280-92. doi: 10.1086/512642.
31. Graves N. Economics and preventing hospital-acquired infection. *Emerg Infect Dis* 2004;10(4):561-6. doi: 10.3201/eid1004.020754.
32. Society of Critical Care Medicine. *Compensation of Critical Care Professionals*: Society of Critical Care Medicine, 2009.
33. Warren DK, Quadir WW, Hollenbeak CS, *et al.* Attributable cost of catheter-associated bloodstream infections among intensive care patients in a nonteaching hospital. *Crit Care Med* 2006;34(8):2084-9. doi: 10.1097/01.CCM.0000227648.15804.2D.

- 1  
2  
3  
4  
5  
6  
7  
8  
9  
10  
11  
12  
13  
14  
15  
16  
17  
18  
19  
20  
21  
22  
23  
24  
25  
26  
27  
28  
29  
30  
31  
32  
33  
34  
35  
36  
37  
38  
39  
40  
41  
42  
43  
44  
45  
46  
47  
48  
49  
50  
51  
52  
53  
54  
55  
56  
57  
58  
59  
60
34. American Hospital Association. *AHA Hospital Statistics. 2013 ed*: American Hospital Association, 2012.
  35. Wunsch H, Angus DC, Harrison DA, *et al*. Variation in critical care services across North America and Western Europe. *Crit Care Med* 2008;36(10):2787-93, e1-9. doi: 10.1097/CCM.0b013e318186aec8.
  36. Pronovost PJ, Goeschel CA, Colantuoni E, *et al*. Sustaining reductions in catheter related bloodstream infections in Michigan intensive care units: observational study. *BMJ* 2010;340:c309. doi: 10.1136/bmj.c309.
  37. Leatherman S, Berwick D, Iles D, *et al*. The business case for quality: case studies and an analysis. *Health Aff (Millwood)* 2003;22(2):17-30.
  38. Galvin RS, Delbanco S, Milstein A, *et al*. Has the leapfrog group had an impact on the health care market? *Health Aff (Millwood)* 2005;24(1):228-33. doi: 10.1377/hlthaff.24.1.228.
  39. Hsu E, Lin D, Evans SJ, *et al*. Doing well by doing good: assessing the cost savings of an intervention to reduce central line-associated bloodstream infections in a Hawaii hospital. *Am J Med Qual* 2014;29(1):13-9. doi: 10.1177/1062860613486173.
  40. Halton K, Graves N. Economic evaluation and catheter-related bloodstream infections. *Emerg Infect Dis* 2007;13(6):815-23. doi: 10.3201/eid1306.070048.
  41. Dimick JB, Pronovost PJ, Heitmiller RF, *et al*. Intensive care unit physician staffing is associated with decreased length of stay, hospital cost, and complications after esophageal resection. *Crit Care Med* 2001;29(4):753-8.
  42. Grutters JP, Sculpher M, Briggs AH, *et al*. Acknowledging patient heterogeneity in economic evaluation : a systematic literature review. *Pharmacoeconomics* 2013;31(2):111-23. doi: 10.1007/s40273-012-0015-4.

- 1  
2  
3  
4  
5  
6  
7  
8  
9  
0  
1  
2  
3  
4  
5  
6  
7  
8  
9  
20  
21  
22  
23  
24  
25  
26  
27  
28  
29  
0  
3  
2  
3  
3  
5  
6  
7  
8  
9  
40  
41  
42  
43  
44  
45  
46  
47  
48  
49  
50  
51  
52  
53  
54  
55  
56  
57  
58  
59  
6
43. Niel-Weise BS, Stijnen T, van den Broek PJ. Anti-infective-treated central venous catheters: a systematic review of randomized controlled trials. *Intensive Care Med* 2007;33(12):2058-68. doi: 10.1007/s00134-007-0897-3.
44. Hockenhull JC, Dwan K, Boland A, *et al.* The clinical effectiveness and cost-effectiveness of central venous catheters treated with anti-infective agents in preventing bloodstream infections: a systematic review and economic evaluation. *Health Technol Assess* 2008;12(12):iii-iv, xi-xii, 1-154.
45. Center for Disease Control and Prevention. *National and State Healthcare Association Infections Progress Report*. Atlanta, 2014.
46. Wise ME, Scott RD, 2nd, Baggs JM, *et al.* National estimates of central line-associated bloodstream infections in critical care patients. *Infect Control Hosp Epidemiol* 2013;34(6):547-54. doi: 10.1086/670629.
47. Dick A, Liu H, Zwanziger J, *et al.* Long-term survival and healthcare utilization outcomes attributable to sepsis and pneumonia. *BMC Health Serv Res* 2012;12:432. doi: 10.1186/1472-6963-12-432.

1  
2  
3  
4  
5  
6  
7  
8  
9  
0  
1  
2  
3  
4  
5  
6  
7  
8  
9  
20  
21  
22  
23  
24  
25  
26  
27  
28  
29  
0  
3  
2  
3  
3  
5  
6  
7  
8  
9  
40  
41  
42  
43  
44  
45  
46  
47  
48  
49  
50  
51  
52  
53  
54  
55  
56  
57  
58  
59  
6

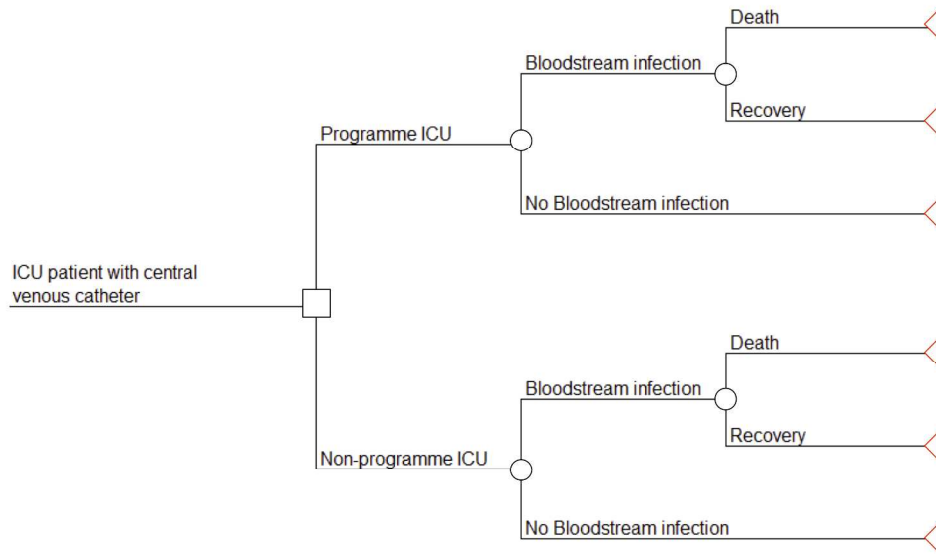

Figure 1 | Decision tree model. Decision tree model depicting programme versus no programme and its effects on outcomes in intensive care unit (ICU) patients. "Bloodstream infections" refers to central line-associated bloodstream infection.  
254x190mm (300 x 300 DPI)

For peer review only



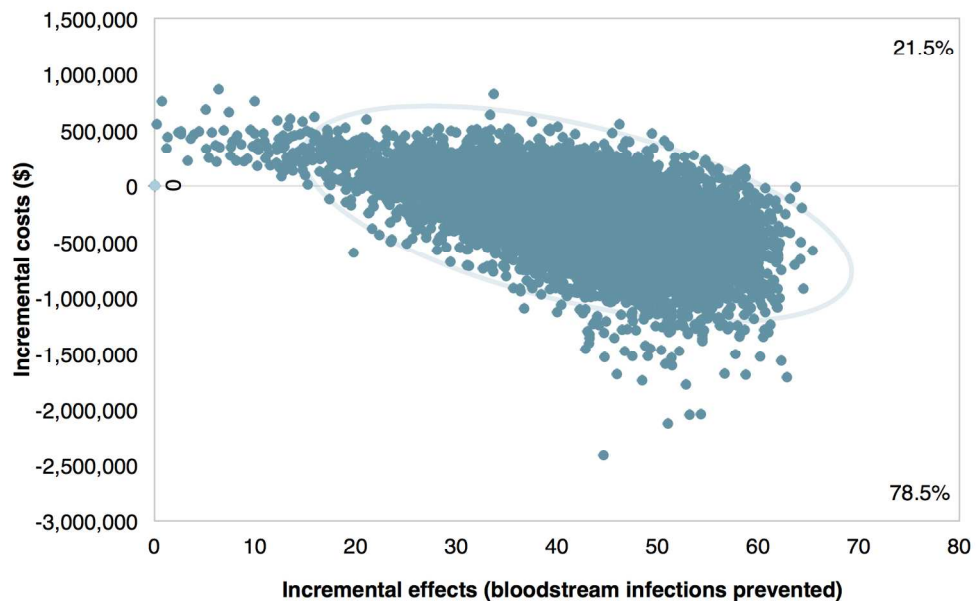

Figure 2 | Cost effectiveness plane for central line-associated bloodstream infections prevented with 95% confidence ellipses. Values on both axes have been multiplied by 1,000 to yield incremental costs and effects expressed per 1,000 patients to aid interpretation. Incremental refers to the difference in costs or effects between programme and non-programme intensive care units. Cost values in US dollars. Boxes in the plot region display the percentage of the distribution of incremental cost-effectiveness ratios falling above or below \$0. The 95% confidence ellipses overlaid on the figure are calculated assuming a bivariate normal distribution and display the uncertainty in the incremental costs effectiveness ratios.  
164x113mm (300 x 300 DPI)

## Web only appendices and tables

### Calculation of the economic cost of a bloodstream infection

As described in the main text, determining the economic cost of a bloodstream infection requires estimating the opportunity costs and variable costs associated with infection.[1] In this analysis, we do not consider the variable costs (e.g., medications and supplies) because they contribute less to the total economic cost than do the opportunity costs. In addition, the probabilistic sensitivity analysis accounts for the variability in the economic cost over a wide range.

The follow steps were taken to estimate the opportunity cost of bloodstream infection. Based on a recent meta analysis, the average attributable excess hospital length of stay for bloodstream infections is 10.4 days.[2] Dividing by the average length of stay for all discharges in acute care hospitals in the United States yields the potential incremental case throughput. Multiplying this potential case throughput per infection prevented by the national average net revenue per equivalent discharge results in a point estimate of \$19,617 (Table A). Using an economic interpretation, this represents the opportunity cost of lost revenue for a single infection. The results of the probabilistic analysis incorporating uncertainty in several of the parameters are displayed in Table 2. We then calculated the 5-year discounted cost of a bloodstream infection, which is the value used in the decision tree model described in the main text.

**Table A. Calculation of economic (opportunity) cost of a bloodstream infection**

|                                                                                                                                                                 | Value  | Calculation      | Uncertainty                                                                      | Source                   |
|-----------------------------------------------------------------------------------------------------------------------------------------------------------------|--------|------------------|----------------------------------------------------------------------------------|--------------------------|
| Average length of stay—all discharges (days)                                                                                                                    | 4.8    | A                |                                                                                  | CDC—NHDS                 |
| Excess total average length of stay attributable to bloodstream infection, i.e., the potential reduction in total length of stay per prevented infection (days) | 10.4   | B                | 6.9 to 15.2                                                                      | Zimlichman               |
| Potential incremental case throughput                                                                                                                           | 2.17   | $C = B/A$        |                                                                                  |                          |
| Median net revenue per equivalent discharge (\$)                                                                                                                | 9,054  | D                | 7,896 to 10,327 (25 <sup>th</sup> and 75 <sup>th</sup> percentile, respectively) | Cleverley and Associates |
| Potential incremental net revenue opportunity per prevented infection, i.e., economic opportunity cost per infection (\$)                                       | 19,617 | $E = C \times D$ |                                                                                  |                          |

**Table B. Results of probabilistic analysis**

|                    |        |
|--------------------|--------|
| Mean               | 19,951 |
| Standard Deviation | 5,978  |

Abbreviations: CDC=Centers for Disease Control and Prevention, NHDS=National Hospital Discharge Survey

## Approach for estimating an average per patient cost of the quality improvement programme

Given that the Keystone ICU project is implemented at the ICU level—and its costs have been estimated at the intensive care unit level—but the decision tree model is implemented at a patient level, a per patient cost of the programme must be determined. Ultimately, this depends on the cost of the programme to a hospital and the number of intensive care unit patients receiving central venous catheters in that hospital (patients who represent the population that stands to benefit from the bloodstream infection prevention effort). It can be argued that all intensive care unit patients in a hospital stand to benefit (regardless of whether they receive a central venous catheter or not) because of the culture change components of the programme, but the approach used here is more conservative.

We estimated a per patient cost of the programme by first deriving a national annual cohort of intensive care unit patients exposed to central venous catheters. To do this, we multiplied 4.85 million estimated annual intensive care unit admissions in the US by an estimate of the proportion of patients admitted to an intensive care unit who receive a central venous catheter,[3] yielding 1.8 million patients who had catheters. We then divided the estimate of 1.8 million patients by the number of hospitals that reported having adult intensive care units in the American Hospital Association Annual Survey of Hospitals.[4] This provided an average number of “exposed” patients per hospital (Table 3). Finally, we divided total costs of the programme per hospital by the number of patients per hospital to yield an average cost for the programme per patient.

**Table C. Calculation of the average number of ICU patients with CVCs**

|                                                                       | <b>Base case</b> | <b>Low value<sup>†</sup></b> | <b>High value<sup>†</sup></b> |
|-----------------------------------------------------------------------|------------------|------------------------------|-------------------------------|
| Number of annual ICU admissions in US                                 | 4,850,000*       | 4,000,000                    | 5,700,000                     |
| <b>X</b> % of ICU admissions receiving CVCs                           | 38%              | 17%                          | 48%                           |
| <b>= Number of ICU patients receiving CVCs</b>                        | <b>1,843,000</b> |                              |                               |
| Number of US hospitals with adult ICUs                                | 4,355            |                              |                               |
| <b>Average number of ICU patients with CVCs per hospital per year</b> | <b>423</b>       |                              |                               |

\*Midpoint between the lowest and highest values identified in the literature

<sup>†</sup>The low value and the high value were used in the probabilistic model to capture the uncertainty in the calculation.

Abbreviation: ICU—intensive care unit, CVC—central venous catheter

Based on this calculation there is an average of 423 intensive care unit patients with central venous catheters per hospital per year in the United States (the average does not distinguish between small hospitals or large hospitals). Multiplying this by 5 to reflect the 5-year period used in this cost effectiveness analysis yields 2,115 patients. Dividing this by the discounted cost of the quality improvement programme for a single hospital over 5 years (\$990,340) results in a per patient cost of the programme of \$468. For the main analysis presented in the paper, we implemented these calculations using Monte Carlo simulation to capture the uncertainty in the

1  
2  
3 base case parameter values. Doing so results in different estimates than the basic arithmetic used  
4 here. As such, we calculated that the mean per patient cost of the programme was \$540 with a  
5 standard deviation of \$120 and we applied a distribution that was lognormal based on normal  
6 mean.  
7

8  
9 This approach has several limitations. First, deriving a patient cost estimate of the programme  
0 was limited by a lack of appropriate individual-based national data on central line utilisation  
1 among intensive care unit patients. We consulted experts to inquire about less apparent sources  
2 of data to aid in the estimation of this parameter but consensus emerged that we would need to  
3 make several assumptions to derive this estimate. These assumptions were based on published  
4 data in the critical care literature and reputable national surveys.[4 5] To address the uncertainty  
5 in our estimate we tested a large standard deviation for the parameter in the probabilistic  
6 sensitivity analysis. The estimate is intended to reflect an average. It is likely that hospitals with  
7 more intensive care unit beds benefit from economies of scale when implementing the  
8 programme, providing a lower programme cost per patient.  
9  
20  
21  
22  
23  
24  
25  
26  
27  
28  
29  
0  
3  
2  
3  
3  
5  
6  
3  
8  
9  
40  
41  
42  
43  
44  
45  
46  
47  
48  
49  
50  
51  
52  
53  
54  
55  
56  
57  
58  
59  
6

Table D. Results from sensitivity analyses

| Model                                          | Incremental cost effectiveness ratio |         |                  |                   |                |                |
|------------------------------------------------|--------------------------------------|---------|------------------|-------------------|----------------|----------------|
|                                                | Mean                                 | Median  | 2.5th Percentile | 97.5th Percentile | Prob. Negative | Prob. Positive |
| <b>Sensitivity Analyses</b>                    |                                      |         |                  |                   |                |                |
| Bloodstream infections discounted              | -3,866                               | -5,442  | -20,912          | 10,921            | 0.79           | 0.21           |
| Deaths discounted                              | -38,191                              | -36,784 | -220,378         | 92,979            | 0.79           | 0.21           |
| 0% discounting of costs, infections prevented  | -5,019                               | -5,578  | -21,467          | 10,923            | 0.79           | 0.21           |
| 0% discounting of costs, deaths prevented      | -40,289                              | -36,855 | -216,212         | 93,041            | 0.79           | 0.21           |
| 5% discounting of costs, infections prevented* | -4,503                               | -4,821  | -19,512          | 10,268            | 0.78           | 0.22           |
| 5% discounting of costs, deaths prevented*     | -32,925                              | -32,605 | -196,368         | 80,484            | 0.79           | 0.21           |

\*The average of the 5-year stream of discounted costs was used.

## References

1. Graves N, Halton K, Lairson D. Economics and preventing hospital-acquired infection: broadening the perspective. *Infect Control Hosp Epidemiol* 2007;28(2):178-84. doi: 10.1086/510787.
2. Zimlichman E, Henderson D, Tamir O, *et al.* Health care-associated infections: a meta-analysis of costs and financial impact on the US health care system. *JAMA Intern Med* 2013;173(22):2039-46. doi: 10.1001/jamainternmed.2013.9763.
3. Warren DK, Quadir WW, Hollenbeak CS, *et al.* Attributable cost of catheter-associated bloodstream infections among intensive care patients in a nonteaching hospital. *Crit Care Med* 2006;34(8):2084-9. doi: 10.1097/01.CCM.0000227648.15804.2D.
4. American Hospital Association. *AHA Hospital Statistics. 2013 ed*: American Hospital Association, 2012.
5. Wunsch H, Angus DC, Harrison DA, *et al.* Comparison of medical admissions to intensive care units in the United States and United Kingdom. *Am J Respir Crit Care Med* 2011;183(12):1666-73. doi: 10.1164/rccm.201012-1961OC.

Web only figures

Figure S1 | Cost effectiveness plane for deaths averted due to bloodstream infections prevented

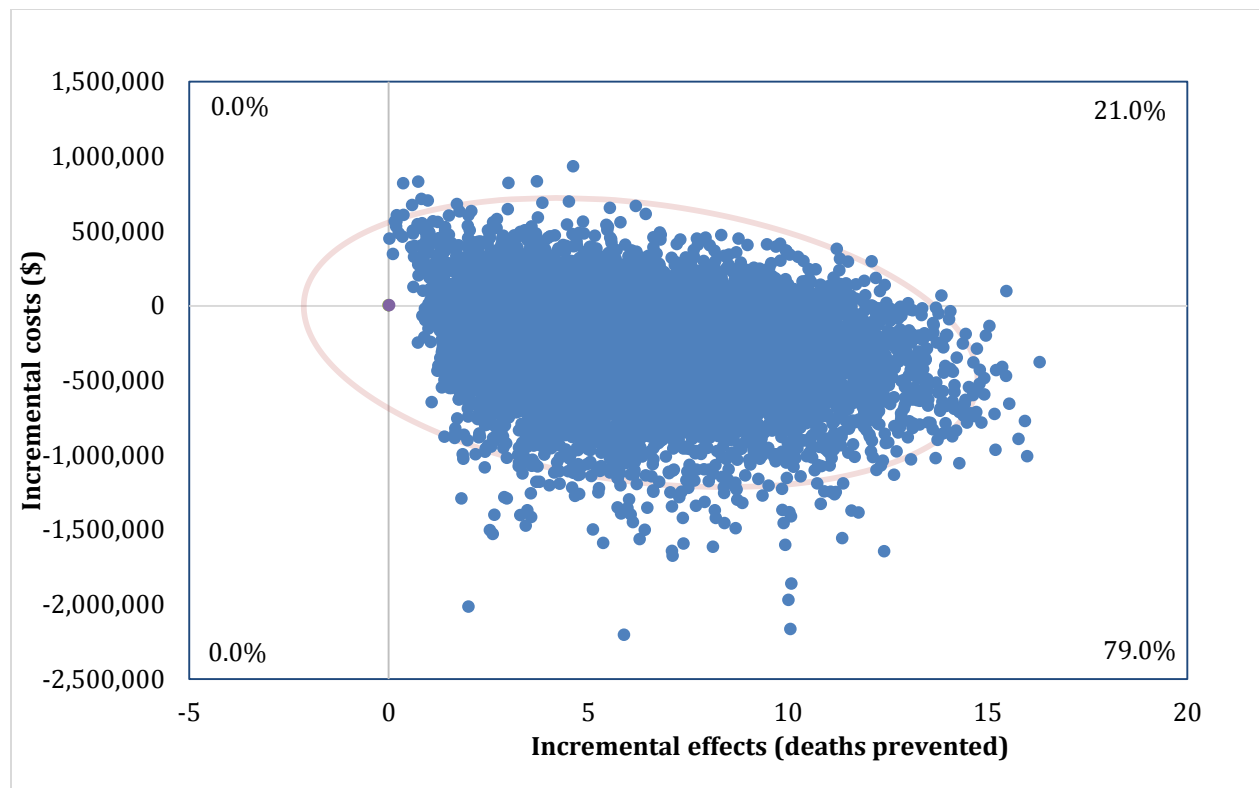

Cost effectiveness plane for deaths averted due to bloodstream infections prevented with 95% confidence ellipses. Values on both axes have been multiplied by 1,000 to yield incremental costs and effects expressed per 1,000 patients to aid interpretation. Incremental refers to the difference in costs or effects between programme and non-programme intensive care units. Cost values in US dollars. Boxes in the plot region display the percentage of the distribution of incremental cost effectiveness ratios falling in each quadrant.

Figure S2 | Tornado diagram for bloodstream infections prevented

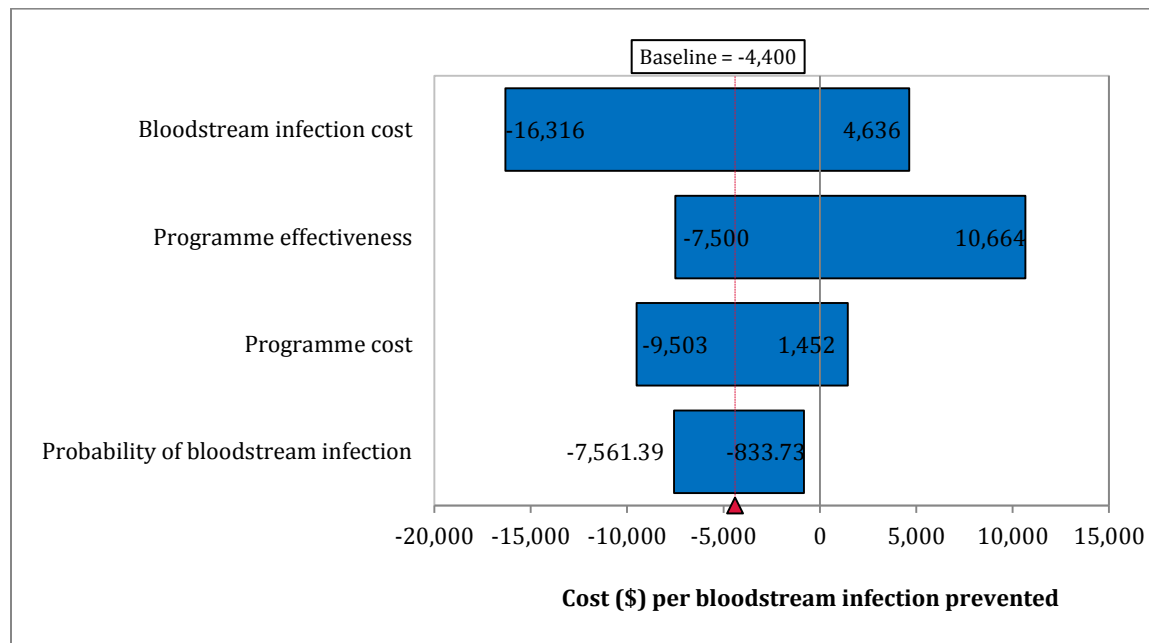

Tornado diagram of model inputs ranked by effect on the mean cost per bloodstream infection prevented. Each parameter was simultaneously sampled 10,000 times from an underlying distribution that reflects uncertainty in the parameter estimate. Cost values are in US dollars.



Figure S3 | Tornado diagram for deaths averted due to bloodstream infections prevented

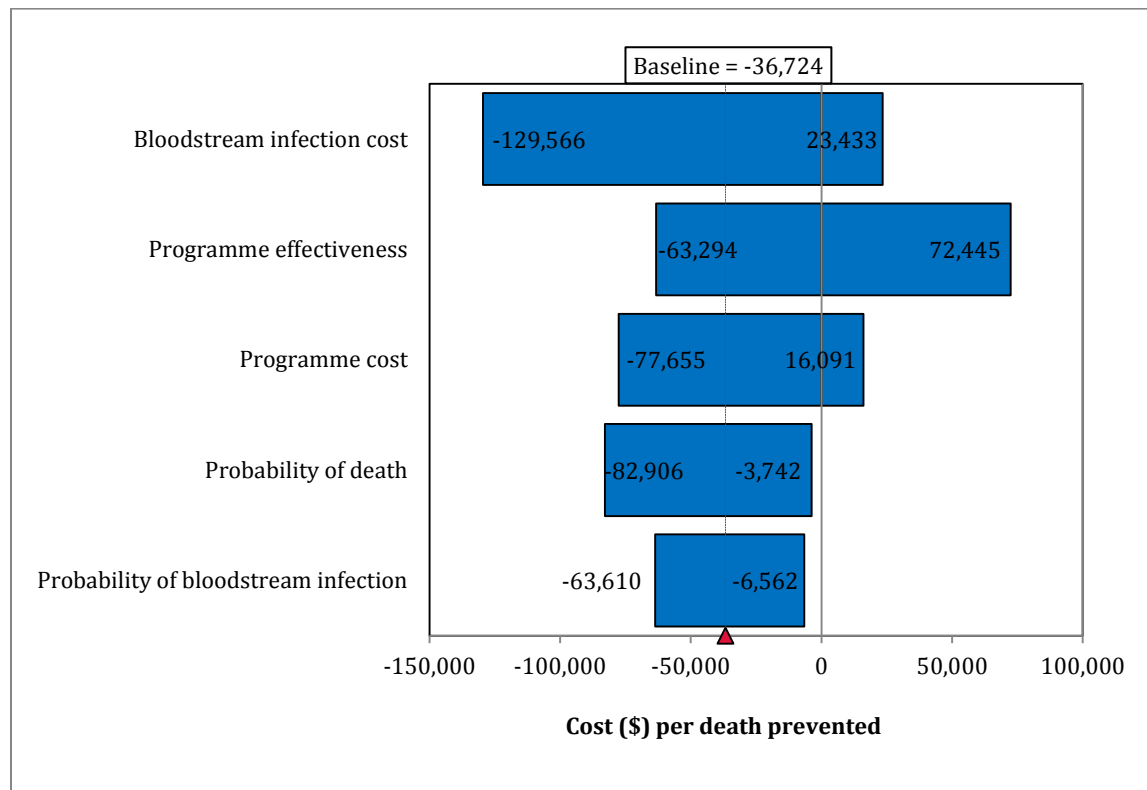

Tornado diagram of model inputs ranked by effect on the mean cost per death prevented. Each parameter was simultaneously sampled 10,000 times from an underlying distribution that reflects uncertainty in the parameter estimate. Cost values are in US dollars.

## Table

Table 1 | CHEERS checklist—Items to include when reporting economic evaluations of health interventions Nos. refer to pages

| Section/item                                           | Item No | Recommendation                                                                                                                                                                                                                                                                                                                                        | Reported on page No/line No |
|--------------------------------------------------------|---------|-------------------------------------------------------------------------------------------------------------------------------------------------------------------------------------------------------------------------------------------------------------------------------------------------------------------------------------------------------|-----------------------------|
| <b>Title and abstract</b>                              |         |                                                                                                                                                                                                                                                                                                                                                       |                             |
| Title                                                  | 1       | Identify the study as an economic evaluation or use more specific terms such as “cost-effectiveness analysis”, and describe the interventions compared.                                                                                                                                                                                               | 1                           |
| Abstract                                               | 2       | Provide a structured summary of objectives, perspective, setting, methods (including study design and inputs), results (including base case and uncertainty analyses), and conclusions.                                                                                                                                                               | 3                           |
| <b>Introduction</b>                                    |         |                                                                                                                                                                                                                                                                                                                                                       |                             |
| Background and objectives                              | 3       | Provide an explicit statement of the broader context for the study.                                                                                                                                                                                                                                                                                   | 5–6                         |
|                                                        |         | Present the study question and its relevance for health policy or practice decisions.                                                                                                                                                                                                                                                                 | 5–6                         |
| <b>Methods</b>                                         |         |                                                                                                                                                                                                                                                                                                                                                       |                             |
| Target population and subgroups                        | 4       | Describe characteristics of the base case population and subgroups analysed, including why they were chosen.                                                                                                                                                                                                                                          | 7                           |
| Setting and location                                   | 5       | State relevant aspects of the system(s) in which the decision(s) need(s) to be made.                                                                                                                                                                                                                                                                  | 7                           |
| Study perspective                                      | 6       | Describe the perspective of the study and relate this to the costs being evaluated.                                                                                                                                                                                                                                                                   | 7                           |
| Comparators                                            | 7       | Describe the interventions or strategies being compared and state why they were chosen.                                                                                                                                                                                                                                                               | 6                           |
| Time horizon                                           | 8       | State the time horizon(s) over which costs and consequences are being evaluated and say why appropriate.                                                                                                                                                                                                                                              | 7                           |
| Discount rate                                          | 9       | Report the choice of discount rate(s) used for costs and outcomes and say why appropriate.                                                                                                                                                                                                                                                            | 11, 12                      |
| Choice of health outcomes                              | 10      | Describe what outcomes were used as the measure(s) of benefit in the evaluation and their relevance for the type of analysis performed.                                                                                                                                                                                                               | 12                          |
| Measurement of effectiveness                           | 11a     | <i>Single study-based estimates</i> : Describe fully the design features of the single effectiveness study and why the single study was a sufficient source of clinical effectiveness data.                                                                                                                                                           | 11                          |
|                                                        | 11b     | <i>Synthesis-based estimates</i> : Describe fully the methods used for identification of included studies and synthesis of clinical effectiveness data.                                                                                                                                                                                               |                             |
| Measurement and valuation of preference based outcomes | 12      | If applicable, describe the population and methods used to elicit preferences for outcomes.                                                                                                                                                                                                                                                           | NA                          |
| Estimating resources and costs                         | 13a     | <i>Single study-based economic evaluation</i> : Describe approaches used to estimate resource use associated with the alternative interventions. Describe primary or secondary research methods for valuing each resource item in terms of its unit cost. Describe any adjustments made to approximate to opportunity costs.                          |                             |
|                                                        | 13b     | <i>Model-based economic evaluation</i> : Describe approaches and data sources used to estimate resource use associated with model health states. Describe primary or secondary research methods for valuing each resource item in terms of its unit cost. Describe any adjustments made to approximate to opportunity costs.                          | 8–11                        |
| Currency, price date, and conversion                   | 14      | Report the dates of the estimated resource quantities and unit costs. Describe methods for adjusting estimated unit costs to the year of reported costs if necessary. Describe methods for converting costs into a common currency base and the exchange rate.                                                                                        | 11                          |
| Choice of model                                        | 15      | Describe and give reasons for the specific type of decision-analytical model used. Providing a figure to show model structure is strongly recommended.                                                                                                                                                                                                | 6; Fig                      |
| Assumptions                                            | 16      | Describe all structural or other assumptions underpinning the decision-analytical model.                                                                                                                                                                                                                                                              | 6                           |
| Analytical methods                                     | 17      | Describe all analytical methods supporting the evaluation. This could include methods for dealing with skewed, missing, or censored data; extrapolation methods; methods for pooling data; approaches to validate or make adjustments (such as half cycle corrections) to a model; and methods for handling population heterogeneity and uncertainty. | 12                          |
| <b>Results</b>                                         |         |                                                                                                                                                                                                                                                                                                                                                       |                             |
| Study parameters                                       | 18      | Report the values, ranges, references, and, if used, probability distributions for all parameters. Report reasons or sources for distributions used to represent uncertainty where appropriate. Providing a table to show the input values is strongly recommended.                                                                                   | 8                           |
| Incremental costs and outcomes                         | 19      | For each intervention, report mean values for the main categories of estimated costs and outcomes of interest, as well as mean differences between the comparator groups. If applicable, report incremental cost-effectiveness ratios.                                                                                                                | 13–15                       |
| Characterising uncertainty                             | 20a     | <i>Single study-based economic evaluation</i> : Describe the effects of sampling uncertainty for the estimated incremental cost and incremental effectiveness parameters, together with the impact of methodological assumptions (such as discount rate, study perspective).                                                                          |                             |

RESEARCH METHODS & REPORTING

(continued)

| Section/Item                                                                                                     | Item No | Recommendation                                                                                                                                                                                                                                                             | Reported on page No/line No |
|------------------------------------------------------------------------------------------------------------------|---------|----------------------------------------------------------------------------------------------------------------------------------------------------------------------------------------------------------------------------------------------------------------------------|-----------------------------|
|                                                                                                                  | 20b     | <i>Model-based economic evaluation:</i> Describe the effects on the results of uncertainty for all input parameters, and uncertainty related to the structure of the model and assumptions.                                                                                | 13–15                       |
| Characterising heterogeneity                                                                                     | 21      | If applicable, report differences in costs, outcomes, or cost-effectiveness that can be explained by variations between subgroups of patients with different baseline characteristics or other observed variability in effects that are not reducible by more information. | NA                          |
| <b>Discussion</b>                                                                                                |         |                                                                                                                                                                                                                                                                            |                             |
| Study findings, limitations, generalisability, and current knowledge                                             | 22      | Summarise key study findings and describe how they support the conclusions reached. Discuss limitations and the generalisability of the findings and how the findings fit with current knowledge.                                                                          | 15–19                       |
| <b>Other</b>                                                                                                     |         |                                                                                                                                                                                                                                                                            |                             |
| Source of funding                                                                                                | 23      | Describe how the study was funded and the role of the funder in the identification, design, conduct, and reporting of the analysis. Describe other non-monetary sources of support.                                                                                        | 20                          |
| Conflicts of interest                                                                                            | 24      | Describe any potential for conflict of interest of study contributors in accordance with journal policy. In the absence of a journal policy, we recommend authors comply with International Committee of Medical Journal Editors recommendations.                          | 21                          |
| For consistency, the CHEERS statement checklist format is based on the format of the CONSORT statement checklist |         |                                                                                                                                                                                                                                                                            |                             |

For peer review only

1  
2  
3  
4  
5  
6  
7  
8  
9  
0  
1  
2  
3  
4  
5  
6  
7  
8  
9  
0  
1  
2  
3  
4  
5  
6  
7  
8  
9  
0  
1  
2  
3  
4  
5  
6  
7  
8  
9  
0  
1  
2  
3  
4  
5  
6  
7  
8  
9  
0  
1  
2  
3  
4  
5  
6  
7  
8  
9  
0  
1  
2  
3  
4  
5  
6  
7  
8  
9  
0
